# Supplementary material for: Visible-light promoted de Mayo reaction by zirconium catalysis
Source: Royal Society of Chemistry journal article supplement (doi:10.1039/d2cc05029c), 2022-01-01

## Supporting Information

# Visible-Light Promoted De Mayo Reaction by Zirconium Catalysis

Wenzhao Zhang, and Sanzhong Luo\*

Center of Basic Molecular Science (CBMS), Department of Chemistry, Tsinghua University, Beijing 100084 (China)

## Table of Contents

|                              |     |
|------------------------------|-----|
| Experimental Procedures..... | S2  |
| Products data.....           | S5  |
| Reference.....               | S16 |
| NMR spectra.....             | S17 |

## Experimental Procedures

**General information:** Commercial reagents were purified prior to use following the guidelines of Perrin and Armarego.<sup>1</sup> All solvents were purified according to the method of Grubbs.<sup>2</sup> Nuclear magnetic resonance (NMR) spectra were recorded using Bruker AV-400 and Bruker AV-500 spectrometers. <sup>1</sup>H and <sup>13</sup>C NMR spectra were measured on a NMR instrument (400 or 500 MHz for <sup>1</sup>H NMR, 101 or 126 MHz for <sup>13</sup>C NMR). Tetramethyl silane (TMS) served as the internal standard for <sup>1</sup>H NMR, and CDCl<sub>3</sub> served as the internal standard for <sup>13</sup>C NMR. HRMS was recorded on a commercial instrument (ESI and APCI Source). UV-Visible spectra were recorded using a PerkinElmer Lambda 950 UV/VIS/NIR spectrophotometer.

**Materials:** The 1,3-dicarbonyl compounds **1a**, **1g**, **1k** and alkenes **2a-2l**, **2o**, **2r**, **5c-5e**, **5h-5k** were commercially available. The alkenes **2m**, **2n**, **2p**, **2t**, **5a**, **5b**, **5f**, **5g**, **5l-5p** were prepared by Wittig reaction from corresponding ketones.<sup>3</sup> The alkene **2q** was prepared from acetophenone.<sup>4</sup> The alkene **2s** was prepared from **2t**.<sup>5</sup> The 1,3-diketones **1b-1f**, **1h-1j** were prepared by Claisen condensation of corresponding substituted hyponone and esters.<sup>6</sup> The  $\beta$ -keto amides **1i-1n** were prepared from corresponding substituted  $\beta$ -keto esters.<sup>7</sup>

### Experimental section:

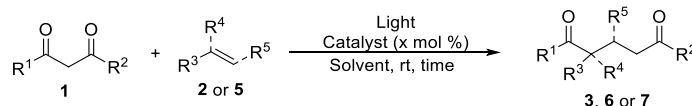

**General procedure:** An oven-dried 10 mL Schlenk tube was charged with **1** (0.1 mmol, 1.0 equiv) and catalyst. The tube was purged with a stream of nitrogen, then substrate **2** or **5** was dissolved in dry solvent and added into the tube *via* syringe. The resulted mixture was degassed three times, and placed approximately 1 cm to 10W 440nm LED and stirred for 6 hours (or given time in Table 2) at room temperature. The reaction solution was concentrated and the residue was purified directly by silica gel column to give the target products **3/6/7** as major product.

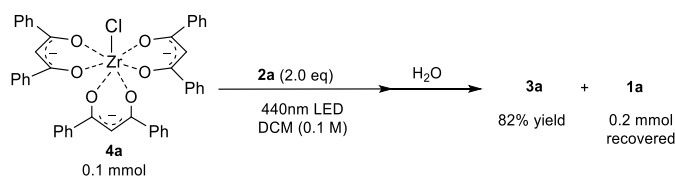

**Stoichiometric experiment:** An oven-dried 10 mL Schlenk tube was charged with **4a** (0.1 mmol, 1.0 equiv) and purged with a stream of nitrogen. Then substrate **2a** was dissolved in dry solvent and added into the tube *via* syringe. The resultant mixture was degassed three times, and placed approximately 1 cm to 10W 440nm LED and stirred at room temperature for 6 h. Then 0.1 mL of H<sub>2</sub>O was added, and stirred for another 0.5 hour at room temperature. The reaction solution was concentrated and the residue was purified directly by silica gel column to give the target products **3a** as major product.

**UV-Visible spectra experiments:** UV-Visible spectra were recorded in DCM using a 1 cm path quartz cuvette contain corresponding compounds under the corresponding concentration with PerkinElmer Lambda 950 UV/VIS/NIR spectrophotometer at room temperature. All the solutions are freshly prepared in degassed DCM for UV analysis.

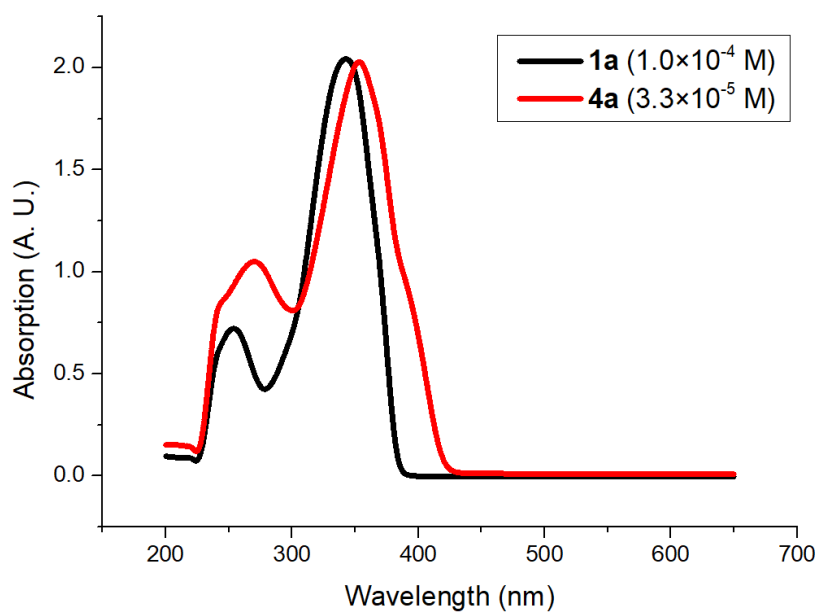

**Figure S1** (Spectra in Scheme 1)<sup>a</sup> UV-Visible spectra of **1a** and **4a** (low concentration)

<sup>a</sup>Optical absorption spectra of **1a** and **4a**, recorded in DCM in 1 cm path quartz cuvettes, [**1a**] =  $1.0 \times 10^{-4}$  mol/L, [**4a**] =  $3.3 \times 10^{-5}$  mol/L.

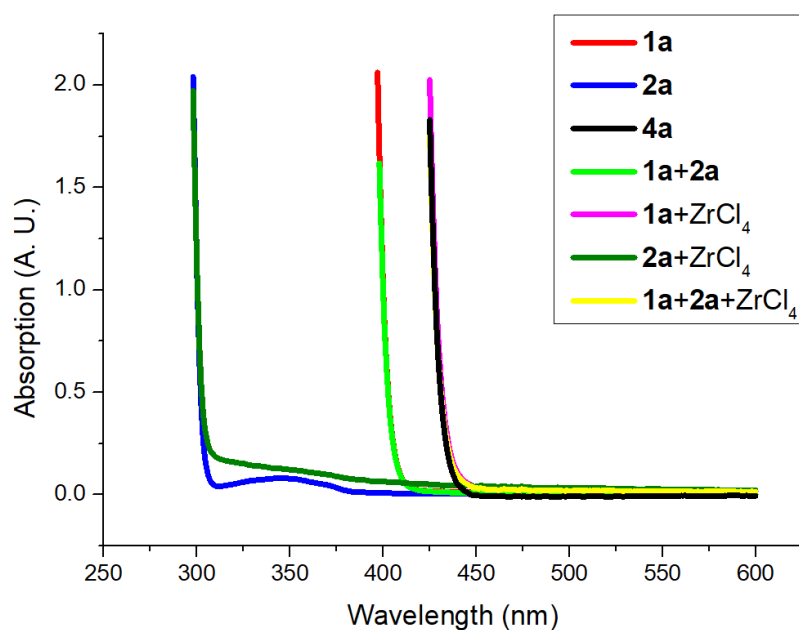

**Figure S2.**<sup>a</sup> UV-Visible spectra of reaction system and **4a** (high concentration)

<sup>a</sup>Optical absorption spectra of **1a**, **2a** and **4a**, recorded in DCM in 1 cm path quartz cuvettes, [**1a**] = 0.1 mol/L, [**2a**] = 0.2 mol/L, [**ZrCl<sub>4</sub>**] =  $2.0 \times 10^{-3}$  mol/L, [**4a**] =  $2.0 \times 10^{-3}$  mol/L.

A) Symmetric diketones

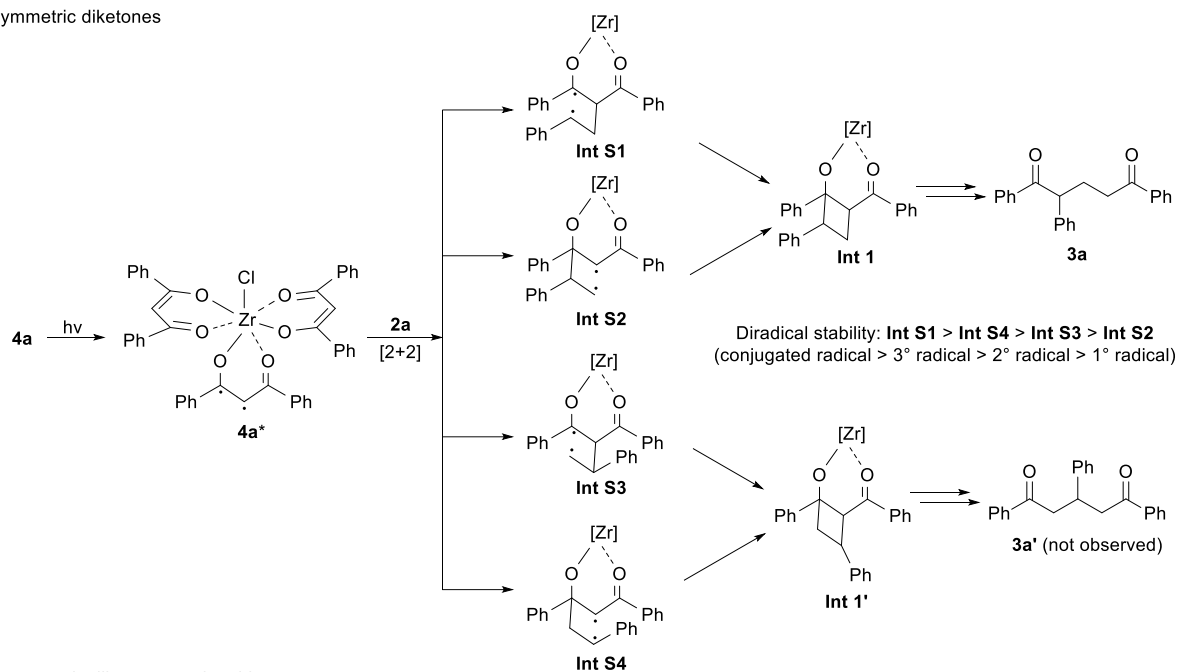

B) Asymmetric diketones and amides

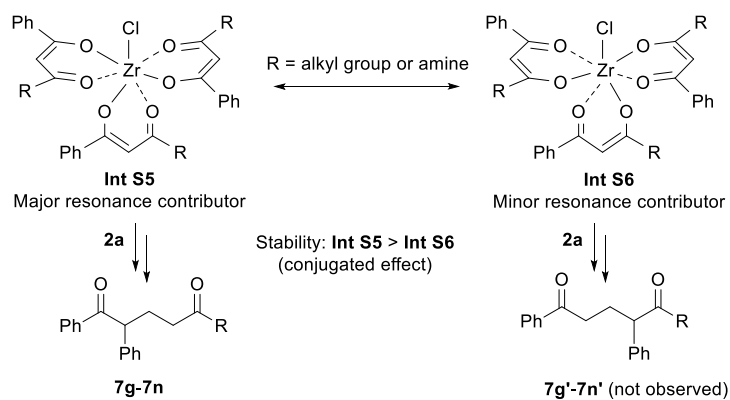

**Scheme S1** Plausible explanation of regioselectivity

## Products data

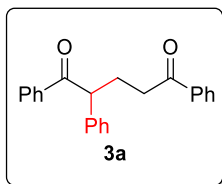

**3a:** 95% yield.  $^1\text{H NMR}$  (400 MHz, Chloroform-*d*)  $\delta$  8.01 – 7.97 (m, 2H), 7.94 – 7.88 (m, 2H), 7.53 (d,  $J = 7.4$  Hz, 1H), 7.50 – 7.36 (m, 5H), 7.35 – 7.25 (m, 4H), 7.24 – 7.19 (m, 1H), 4.79 (t,  $J = 7.3$  Hz, 1H), 2.98 (qt,  $J = 17.2, 6.9$  Hz, 2H), 2.60 (dq,  $J = 14.3, 7.2$  Hz, 1H), 2.39 – 2.21 (m, 1H).  $^{13}\text{C NMR}$  (101 MHz, Chloroform-*d*)  $\delta$  199.85, 199.57, 139.11, 136.77, 136.59, 132.99, 132.88, 129.00, 128.73, 128.51, 128.47, 128.28, 127.98, 127.18, 52.40, 35.93, 28.26. IR (thin film,  $\text{cm}^{-1}$ ) 3060, 3026, 2933, 1681, 1597, 1580, 1492, 447, 1409, 1367, 1275, 1222, 1178, 1001, 980, 751, 734, 698, 568, 518. HRMS (APCI) calcd for  $\text{C}_{23}\text{H}_{21}\text{O}_2$ : 329.1539, found 325.1539.

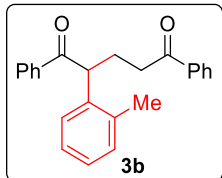

**3b:** 81% yield.  $^1\text{H NMR}$  (400 MHz, Chloroform-*d*)  $\delta$  7.93 (dd,  $J = 8.3, 1.4$  Hz, 2H), 7.85 (dd,  $J = 8.4, 1.3$  Hz, 2H), 7.57 – 7.51 (m, 1H), 7.43 (dd,  $J = 8.6, 7.1$  Hz, 3H), 7.35 (dd,  $J = 8.4, 7.0$  Hz, 2H), 7.20 (d,  $J = 6.9$  Hz, 1H), 7.15 – 7.06 (m, 3H), 4.93 (dd,  $J = 8.8, 5.3$  Hz, 1H), 3.12 (dt,  $J = 17.3, 6.7$  Hz, 1H), 3.01 (dt,  $J = 17.3, 7.0$  Hz, 1H), 2.55 (m, 4H), 2.18 (dtd,  $J = 14.1, 7.1, 5.3$  Hz, 1H).  $^{13}\text{C NMR}$  (101 MHz, Chloroform-*d*)  $\delta$  200.33, 200.07, 137.96, 136.95, 136.82, 135.38, 133.02, 132.80, 131.12, 128.55, 128.50, 128.43, 128.03, 127.28, 127.10, 126.63, 48.69, 36.26, 27.63, 19.76. IR (thin film,  $\text{cm}^{-1}$ ) 3345, 3062, 3025, 2962, 2930, 1722, 1683, 1597, 1580, 1490, 1448, 1409, 1365, 1261, 1222, 1180, 1100, 1027, 799, 750, 731, 690, 600, 553, 454. HRMS (APCI) calcd for  $\text{C}_{24}\text{H}_{23}\text{O}_2$ : 343.1693, found 343.1694.

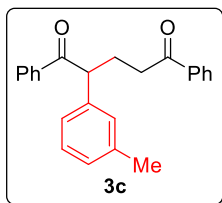

**3c:** 91% yield.  $^1\text{H NMR}$  (400 MHz, Chloroform-*d*)  $\delta$  8.02 – 7.95 (m, 2H), 7.94 – 7.86 (m, 2H), 7.58 – 7.35 (m, 6H), 7.17 (d,  $J = 7.8$  Hz, 1H), 7.10 (d,  $J = 5.9$  Hz, 2H), 7.02 (d,  $J = 7.5$  Hz, 1H), 4.73 (t,  $J = 7.3$  Hz, 1H), 3.02 (dt,  $J = 17.1, 7.2$  Hz, 1H), 2.92 (dt,  $J = 17.1, 6.7$  Hz, 1H), 2.58 (dd,  $J = 14.1, 7.1$  Hz, 1H), 2.29 (m, 4H).  $^{13}\text{C NMR}$  (101 MHz, Chloroform-*d*)  $\delta$  200.00, 199.69, 139.08, 138.75, 136.91, 136.75, 133.03, 132.90, 128.90, 128.85, 128.81, 128.57, 128.52, 128.06, 128.05, 125.52, 52.45, 36.06, 28.39, 21.42. IR (thin film,  $\text{cm}^{-1}$ ) 3059, 3026, 2930, 2861, 1681, 1597, 1580, 1489, 1448, 1366, 1261, 1213, 1180, 1094, 1074, 1057, 1002, 982, 796, 748, 126, 692. HRMS (APCI) calcd for  $\text{C}_{24}\text{H}_{23}\text{O}_2$ : 343.1693, found 343.1695.

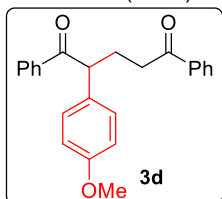

**3d:** 77% yield.  $^1\text{H NMR}$  (400 MHz, Chloroform-*d*)  $\delta$  8.02 – 7.96 (m, 2H), 7.94 – 7.86 (m, 2H), 7.56 – 7.50 (m, 1H), 7.42 (dt,  $J = 18.7, 7.7$  Hz, 5H), 7.22 (d,  $J = 8.4$  Hz, 2H), 6.96 – 6.74 (m, 2H), 4.73 (t,  $J = 7.4$  Hz, 1H), 3.74 (s, 3H), 3.16 – 2.85 (m, 2H), 2.56 (dd,  $J = 14.0, 7.1$  Hz, 1H), 2.27 (dt,  $J = 14.0, 7.0$  Hz, 1H).  $^{13}\text{C NMR}$  (101 MHz, Chloroform-*d*)  $\delta$  199.94, 199.79, 158.67, 136.78, 136.61, 132.98, 132.81, 131.00, 129.33, 128.70, 128.50, 128.45, 127.98, 114.40, 55.13, 51.48, 35.90, 28.22. IR (thin film,  $\text{cm}^{-1}$ ) 3343, 3060, 3002, 2955, 2933, 2836, 1682, 1608, 1597, 1581, 1511, 1449, 1367, 1303, 1178, 1111, 1075, 1034, 11001, 981, 828, 750, 733, 690, 563, 532. HRMS (APCI) calcd for  $\text{C}_{24}\text{H}_{23}\text{O}_3$ : 359.1642, found 359.1643.

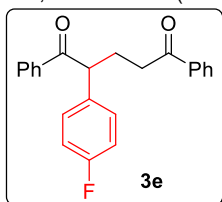

**3e:** 88% yield.  $^1\text{H NMR}$  (400 MHz, Chloroform-*d*)  $\delta$  8.03 – 7.94 (m, 2H), 7.95 – 7.84 (m, 2H), 7.59 – 7.50 (m, 1H), 7.50 – 7.46 (m, 1H), 7.45 – 7.36 (m, 4H), 7.28 (ddd,  $J = 9.7, 5.9, 3.2$  Hz, 2H), 6.98 (t,  $J = 8.6$  Hz, 2H), 4.80 (t,  $J = 7.4$  Hz, 1H), 3.16 – 2.81 (m, 2H), 2.59 (dd,  $J = 14.1, 7.1$  Hz, 1H), 2.27 (dt,  $J = 14.0, 6.9$  Hz, 1H).  $^{13}\text{C NMR}$  (101 MHz, Chloroform-*d*)  $\delta$  198.27, 197.98, 166.93 (d,  $J = 17.3$  Hz), 164.40 (d,  $J = 17.6$  Hz), 138.97, 133.23 (d,  $J = 3.0$  Hz), 132.96 (d,  $J = 2.9$  Hz), 131.46 (d,  $J = 9.3$  Hz), 130.68 (d,  $J = 9.3$  Hz),

129.19, 128.26, 127.41, 115.78 (d,  $J = 2.3$  Hz), 115.56 (d,  $J = 2.2$  Hz), 52.44, 35.82, 28.26.  $^{19}\text{F}$  NMR (377 MHz, Chloroform- $d$ )  $\delta$  -115.15. IR (thin film,  $\text{cm}^{-1}$ ) 3347, 3064, 2932, 2857, 1967, 1898, 1683, 1597, 1580, 1507, 1448, 1417, 1367, 1277, 1224, 1179, 1158, 1098, 1074, 1001, 979, 960, 832, 752, 731, 690, 556, 516. HRMS (APCI) calcd for  $\text{C}_{23}\text{H}_{20}\text{O}_2\text{F}$ : 347.1442, found 347.1443.

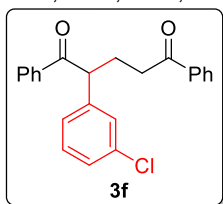

**3f**: >99% yield.  $^1\text{H}$  NMR (400 MHz, Chloroform- $d$ )  $\delta$  8.02 – 7.95 (m, 2H), 7.94 – 7.87 (m, 2H), 7.51 (dd,  $J = 15.3, 7.4$  Hz, 2H), 7.41 (dt,  $J = 10.5, 7.6$  Hz, 4H), 7.35 (d,  $J = 2.3$  Hz, 1H), 7.21 (d,  $J = 3.8$  Hz, 3H), 4.80 (t,  $J = 7.3$  Hz, 1H), 2.98 (qt,  $J = 17.4, 6.8$  Hz, 2H), 2.59 (dq,  $J = 14.3, 7.1$  Hz, 1H), 2.27 (dq,  $J = 13.9, 6.9$  Hz, 1H).  $^{13}\text{C}$  NMR (101 MHz, Chloroform- $d$ )  $\delta$  199.56, 198.98, 141.08, 136.63, 136.27, 134.73, 133.15, 133.08, 130.19, 128.68, 128.58, 128.53, 128.28, 127.92, 127.46, 126.53, 51.75, 35.72, 28.19. IR (thin film,  $\text{cm}^{-1}$ ) 3345, 3060, 2959, 2932, 2872, 1967, 1812, 1723, 1683, 1596, 1580, 1473, 1448, 1431, 1367, 1276, 1222, 1180, 1124, 1080, 1001, 980, 884, 842, 783, 755, 718, 689, 595, 569, 548, 491. HRMS (APCI) calcd for  $\text{C}_{23}\text{H}_{20}\text{O}_2\text{Cl}$ : 363.1146, found 363.1148.

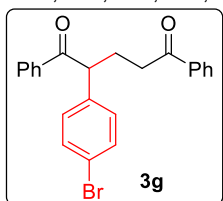

**3g**: 97% yield.  $^1\text{H}$  NMR (400 MHz, Chloroform- $d$ )  $\delta$  7.97 (d,  $J = 7.7$  Hz, 2H), 7.90 (d,  $J = 7.8$  Hz, 2H), 7.58 – 7.46 (m, 2H), 7.40 (dt,  $J = 12.7, 7.8$  Hz, 6H), 7.20 (d,  $J = 8.2$  Hz, 2H), 4.79 (t,  $J = 7.4$  Hz, 1H), 2.97 (dt,  $J = 10.2, 6.9$  Hz, 2H), 2.59 (dd,  $J = 14.1, 7.1$  Hz, 1H), 2.34 – 2.19 (m, 1H).  $^{13}\text{C}$  NMR (101 MHz, Chloroform- $d$ )  $\delta$  199.54, 199.13, 138.07, 136.60, 136.25, 133.08, 133.05, 132.05, 129.97, 128.63, 128.53, 128.50, 127.89, 121.18, 51.52, 35.66, 28.03. IR (thin film,  $\text{cm}^{-1}$ ) 3346, 3060, 2959, 2932, 1967, 1773, 1683, 1596, 1580, 1487, 1448, 1405, 1367, 1275, 1222, 1199, 1178, 1074, 1011, 1001, 978, 810, 754, 703, 689, 530. HRMS (APCI) calcd for  $\text{C}_{23}\text{H}_{20}\text{O}_2\text{Br}$ : 407.0641, found 407.0643.

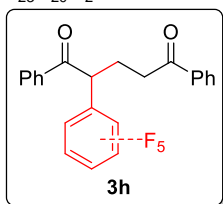

**3h**: 88% yield.  $^1\text{H}$  NMR (400 MHz, Chloroform- $d$ )  $\delta$  7.92 (t,  $J = 8.7$  Hz, 4H), 7.61 – 7.50 (m, 2H), 7.44 (q,  $J = 8.2$  Hz, 4H), 5.04 (t,  $J = 7.3$  Hz, 1H), 3.09 (t,  $J = 6.8$  Hz, 2H), 2.78 (dq,  $J = 14.0, 7.0$  Hz, 1H), 2.30 (dq,  $J = 14.0, 6.9$  Hz, 1H).  $^{13}\text{C}$  NMR (101 MHz, Chloroform- $d$ )  $\delta$  198.86, 196.05, 136.53, 135.61, 133.42, 133.29, 128.82, 128.64, 128.24, 127.91, 42.63, 35.65, 24.40.  $^{19}\text{F}$  NMR (377 MHz, Chloroform- $d$ )  $\delta$  -140.83 – -140.98 (m), -154.31 (t,  $J = 20.9$  Hz), -160.87 (td,  $J = 22.1, 7.9$  Hz). IR (thin film,  $\text{cm}^{-1}$ ) 3359, 3062, 2936, 2641, 2422, 1967, 1688, 1655, 1597, 1581, 1522, 1501, 1149, 1273, 1221, 1182, 1124, 1001, 970, 948, 864, 847, 723, 700, 661. HRMS (APCI) calcd for  $\text{C}_{23}\text{H}_{16}\text{O}_2\text{F}_5$ : 419.1065, found 419.1064.

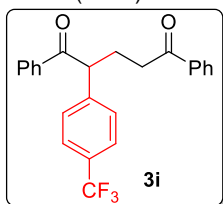

**3i**: 92% yield.  $^1\text{H}$  NMR (400 MHz, Chloroform- $d$ )  $\delta$  8.06 – 7.96 (m, 2H), 7.94 – 7.88 (m, 2H), 7.61 – 7.51 (m, 4H), 7.43 (ddd,  $J = 17.7, 8.9, 6.6$  Hz, 6H), 4.91 (t,  $J = 7.3$  Hz, 1H), 2.99 (q,  $J = 6.9$  Hz, 2H), 2.63 (dq,  $J = 14.2, 7.1$  Hz, 1H), 2.29 (dq,  $J = 13.8, 6.8$  Hz, 1H).  $^{13}\text{C}$  NMR (101 MHz, Chloroform- $d$ )  $\delta$  199.53, 199.01, 143.19, 136.65, 136.28, 133.30, 133.18, 129.67, 129.34, 128.71, 128.59, 127.95, 125.94 (q,  $J = 3.8$  Hz), 123.98 (d,  $J = 272.0$  Hz), 51.92, 35.69, 28.21. IR (thin film,  $\text{cm}^{-1}$ ) 3349, 3062, 2934, 1922, 1811, 1683, 1617, 1597, 1581, 1449, 1419, 1367, 1325, 1277, 11223, 1166, 1124, 1069, 1017, 1001, 977, 831, 752, 728, 699, 666, 610, 569, 528. HRMS (APCI) calcd for  $\text{C}_{24}\text{H}_{20}\text{O}_2\text{F}_3$ : 397.1410, found 397.1411.

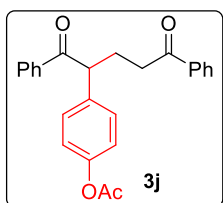

**3j:** >99% yield.  $^1\text{H NMR}$  (400 MHz, Chloroform-*d*)  $\delta$  7.98 (d,  $J = 7.6$  Hz, 2H), 7.90 (d,  $J = 7.5$  Hz, 2H), 7.58 – 7.45 (m, 2H), 7.41 (dt,  $J = 14.8, 7.5$  Hz, 4H), 7.33 (d,  $J = 8.2$  Hz, 2H), 7.03 (d,  $J = 8.3$  Hz, 2H), 4.82 (t,  $J = 7.4$  Hz, 1H), 3.08 – 2.87 (m, 2H), 2.58 (dd,  $J = 14.1, 7.1$  Hz, 1H), 2.34 – 2.19 (m, 4H).  $^{13}\text{C NMR}$  (101 MHz, Chloroform-*d*)  $\delta$  199.85, 199.57, 169.32, 149.82, 136.77, 136.59, 136.52, 133.14, 129.34, 128.80, 128.64, 128.62, 128.05, 122.11, 51.57, 35.89, 28.40, 21.15. IR (thin film,  $\text{cm}^{-1}$ ) 3341, 3085, 3060, 3036, 2928, 2872, 2360, 2341, 1756, 1677, 1596, 1580, 1504, 1447, 1367, 1275, 1195, 1166, 1001, 977, 959, 911, 836, 751, 688, 553. HRMS (APCI) calcd for  $\text{C}_{25}\text{H}_{22}\text{O}_4$ : 386.1518, found 386.1514.

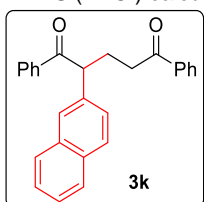

**3k:** >99% yield.  $^1\text{H NMR}$  (400 MHz, Chloroform-*d*)  $\delta$  8.07 – 8.00 (m, 2H), 7.95 – 7.88 (m, 2H), 7.85 – 7.72 (m, 4H), 7.58 – 7.32 (m, 9H), 4.98 (t,  $J = 7.3$  Hz, 1H), 3.02 (qt,  $J = 17.3, 6.9$  Hz, 2H), 2.71 (dt,  $J = 14.1, 7.1$  Hz, 1H), 2.43 (dt,  $J = 14.0, 6.9$  Hz, 1H).  $^{13}\text{C NMR}$  (101 MHz, Chloroform-*d*)  $\delta$  199.95, 199.63, 136.89, 136.73, 136.71, 133.68, 133.07, 132.99, 132.60, 128.95, 128.84, 128.58, 128.06, 127.81, 127.67, 127.32, 126.28, 125.97, 52.59, 36.00, 28.35. IR (thin film,  $\text{cm}^{-1}$ ) 3342, 3056, 2931, 2872, 2360, 2341, 1677, 1596, 1579, 1507, 1447, 1364, 1275, 1262, 1195, 1180, 978, 861, 815, 749, 722, 687, 478. HRMS (APCI) calcd for  $\text{C}_{27}\text{H}_{22}\text{O}_2$ : 378.1620, found 378.1613.

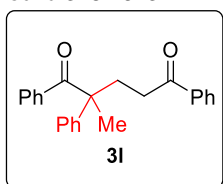

**3l:** 73% yield.  $^1\text{H NMR}$  (400 MHz, Chloroform-*d*)  $\delta$  7.85 – 7.79 (m, 2H), 7.55 – 7.48 (m, 3H), 7.42 – 7.35 (m, 7H), 7.30 (s, 1H), 7.27 – 7.20 (m, 2H), 2.84 (ddd,  $J = 14.5, 9.8, 6.0$  Hz, 2H), 2.49 (dt,  $J = 10.1, 5.8$  Hz, 2H), 1.67 (s, 3H).  $^{13}\text{C NMR}$  (101 MHz, Chloroform-*d*)  $\delta$  203.06, 199.90, 143.67, 136.64, 136.28, 132.92, 131.88, 129.59, 129.06, 128.48, 128.06, 128.04, 127.11, 126.22, 54.15, 34.74, 34.08, 24.33. IR (thin film,  $\text{cm}^{-1}$ ) 3337, 3059, 1025, 2974, 1934, 1967, 1679, 1597, 1580, 1496, 1447, 1366, 1317, 1281, 1244, 1180, 1077, 1029, 1002, 166, 846, 761, 742, 715, 702, 690, 572. HRMS (ESI) calcd for  $\text{C}_{24}\text{H}_{22}\text{O}_2\text{Na}^+$ : 365.1512, found 365.1515.

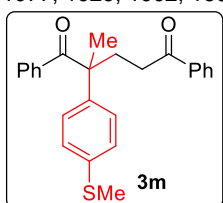

**3m:** >99% yield.  $^1\text{H NMR}$  (400 MHz, Chloroform-*d*)  $\delta$  7.87 – 7.77 (m, 2H), 7.57 – 7.46 (m, 3H), 7.46 – 7.33 (m, 3H), 7.32 – 7.16 (m, 6H), 2.98 – 2.67 (m, 2H), 2.56 – 2.39 (m, 5H), 1.64 (s, 3H).  $^{13}\text{C NMR}$  (101 MHz, Chloroform-*d*)  $\delta$  203.00, 199.86, 140.43, 137.45, 136.72, 136.32, 132.99, 131.98, 129.62, 128.54, 128.17, 128.09, 126.98, 126.78, 53.82, 34.75, 34.11, 24.37, 15.61. IR (thin film,  $\text{cm}^{-1}$ ) 3338, 3058, 2979, 2921, 2360, 2341, 1902, 1673, 1596, 1578, 1559, 1492, 1446, 1365, 1276, 1240, 1179, 1100, 965, 822, 748, 689, 659, 571. HRMS (APCI) calcd for  $\text{C}_{25}\text{H}_{24}\text{O}_2\text{S}$ : 388.1497, found 388.1491.

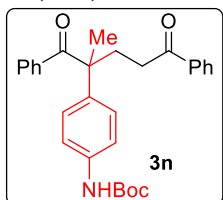

**3n:** 79% yield.  $^1\text{H NMR}$  (400 MHz, Chloroform-*d*)  $\delta$  7.94 – 7.77 (m, 2H), 7.61 – 7.47 (m, 3H), 7.47 – 7.36 (m, 5H), 7.34 – 7.19 (m, 4H), 6.63 (s, 1H), 2.84 (ddd,  $J = 13.4, 8.9, 6.9$  Hz, 2H), 2.47 (ddd,  $J = 9.3, 6.6, 2.0$  Hz, 2H), 1.65 (s, 3H), 1.54 (s, 9H).  $^{13}\text{C NMR}$  (101 MHz, Chloroform-*d*)  $\delta$  203.26, 200.02, 152.73, 137.97, 137.50, 136.71, 136.42, 132.97, 131.90, 129.62, 128.53, 128.13, 128.10, 126.92, 118.92, 80.69, 53.69, 34.78, 34.14, 28.35, 24.30. IR (thin film,  $\text{cm}^{-1}$ ) 3340, 2977, 2931, 2361, 2341, 2294, 1723, 1672, 1594, 121, 1448, 1407, 1366, 1261, 12333, 1155, 1052, 977, 906, 838, 765, 749, 737, 689, 574. HRMS (APCI) calcd for  $\text{C}_{29}\text{H}_{31}\text{NO}_4$ : 457.2253, found 457.2242.

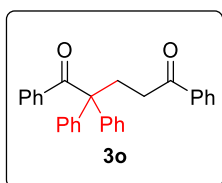

**3o**: 49% yield.  $^1\text{H}$  NMR (400 MHz, Chloroform-*d*)  $\delta$  7.77 – 7.72 (m, 2H), 7.59 (d,  $J$  = 7.8 Hz, 2H), 7.52 – 7.44 (m, 1H), 7.42 (d,  $J$  = 7.8 Hz, 4H), 7.38 – 7.28 (m, 7H), 7.24 (t,  $J$  = 7.3 Hz, 2H), 7.17 (t,  $J$  = 7.7 Hz, 2H), 2.89 – 2.81 (m, 2H), 2.76 (dt,  $J$  = 10.4, 4.1 Hz, 2H).  $^{13}\text{C}$  NMR (101 MHz, Chloroform-*d*)  $\delta$  201.29, 199.91, 141.39, 137.22, 136.78, 132.81, 131.68, 129.90, 129.20, 128.45, 128.39, 127.96, 127.78, 127.06, 64.12, 36.00, 35.20. IR (thin film,  $\text{cm}^{-1}$ ) 3337, 3058, 3032, 2979, 1967, 1683, 1597, 1580, 1495, 147, 1364, 1281, 1224, 1180, 1377, 1094, 1001, 990, 968, 845, 753, 701, 653, 587. HRMS (APCI) calcd for  $\text{C}_{29}\text{H}_{25}\text{O}_2$ : 405.1849, found 405.1852.

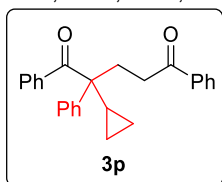

**3p**: 68% yield.  $^1\text{H}$  NMR (400 MHz, Chloroform-*d*)  $\delta$  7.84 – 7.76 (m, 2H), 7.62 – 7.56 (m, 2H), 7.52 (d,  $J$  = 7.4 Hz, 1H), 7.46 – 7.37 (m, 3H), 7.37 – 7.30 (m, 4H), 7.29 – 7.23 (m, 3H), 3.14 (ddd,  $J$  = 16.0, 11.8, 4.2 Hz, 1H), 2.62 (ddd,  $J$  = 16.0, 11.8, 4.2 Hz, 1H), 2.49 (ddd,  $J$  = 13.6, 11.8, 4.2 Hz, 1H), 2.20 (ddd,  $J$  = 13.5, 11.8, 4.2 Hz, 1H), 1.69 (ddd,  $J$  = 8.6, 5.7, 2.8 Hz, 1H), 0.76 – 0.65 (m, 1H), 0.48 – 0.31 (m, 2H), 0.17 – 0.04 (m, 1H).  $^{13}\text{C}$  NMR (101 MHz, Chloroform-*d*)  $\delta$  201.79, 199.94, 141.29, 136.76, 136.36, 132.92, 131.96, 130.02, 128.50, 128.47, 128.17, 128.05, 128.02, 127.25, 57.33, 34.17, 30.85, 18.03, 3.87, 0.15. IR (thin film,  $\text{cm}^{-1}$ ) 3060, 3023, 2924, 2853, 2361, 2341, 1676, 1597, 1579, 1493, 1447, 1277, 1237, 1179, 1002, 972, 846, 790, 751, 704, 690, 581. HRMS (APCI) calcd for  $\text{C}_{26}\text{H}_{24}\text{O}_2$ : 368.1776, found 368.1768.

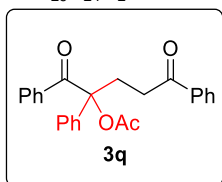

**3q**: 74% yield.  $^1\text{H}$  NMR (400 MHz, Chloroform-*d*)  $\delta$  7.78 (dd,  $J$  = 8.4, 1.4 Hz, 2H), 7.73 – 7.67 (m, 2H), 7.58 (dd,  $J$  = 8.4, 1.3 Hz, 2H), 7.51 (t,  $J$  = 7.4 Hz, 1H), 7.46 – 7.31 (m, 6H), 7.25 (dd,  $J$  = 8.4, 7.1 Hz, 2H), 3.15 (ddd,  $J$  = 14.5, 9.1, 6.1 Hz, 1H), 2.96 – 2.68 (m, 3H), 1.99 (s, 3H).  $^{13}\text{C}$  NMR (101 MHz, Chloroform-*d*)  $\delta$  198.98, 196.24, 169.17, 137.34, 136.75, 135.29, 132.96, 132.15, 129.11, 128.91, 128.52, 128.37, 128.08, 128.01, 125.04, 88.50, 32.54, 31.81, 21.17. IR (thin film,  $\text{cm}^{-1}$ ) 3351, 3087, 3059, 3027, 2959, 2845, 2360, 2341, 1740, 1680, 1492, 1447, 1368, 1255, 1216, 1182, 1101, 1002, 881, 848, 748, 699, 689, 660, 635, 606, 578, 522. HRMS (APCI) calcd for  $\text{C}_{25}\text{H}_{22}\text{O}_4$ : 386.1518, found 386.1508.

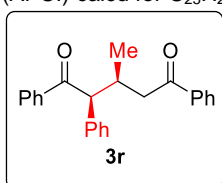

**3r**: 75% yield, 3.5:1 *d.r.* from *Z*-**2v**; 68% yield, 9.0:1 *d.r.* from *E*-**2v**. Major diastereoisomer:  $^1\text{H}$  NMR (400 MHz, Chloroform-*d*)  $\delta$  8.14 – 7.11 (m, 15H), 4.61 (d,  $J$  = 9.5 Hz, 1H), 3.27 (dd,  $J$  = 15.1, 3.7 Hz, 1H), 3.10 (dtt,  $J$  = 9.8, 6.4, 3.3 Hz, 1H), 2.74 (dd,  $J$  = 15.1, 9.2 Hz, 1H), 0.83 (d,  $J$  = 6.8 Hz, 3H).  $^{13}\text{C}$  NMR (101 MHz, Chloroform-*d*)  $\delta$  199.97, 199.82, 137.45, 137.08, 136.94, 132.97, 128.99, 128.82, 128.62, 128.55, 128.42, 128.33, 127.98, 127.29, 59.06, 44.34, 33.54, 17.39. IR (thin film,  $\text{cm}^{-1}$ ) 3337, 3060, 3057, 2965, 2933, 1966, 1680, 1597, 1580, 1492, 1517, 1363, 1278, 1214, 1179, 1074, 1001, 94, 894, 837, 751, 698, 658, 526. HRMS (APCI) calcd for  $\text{C}_{24}\text{H}_{23}\text{O}_2$ : 343.1693, found 343.1692.

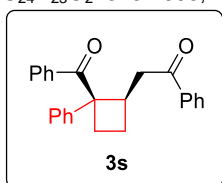

**3s**: 57% yield.  $^1\text{H}$  NMR (400 MHz, Chloroform-*d*)  $\delta$  8.08 – 7.99 (m, 2H), 7.96 – 7.85 (m, 2H), 7.61 – 7.16 (m, 11H), 5.40 (s, 1H), 3.26 (d,  $J$  = 17.3 Hz, 1H), 2.98 (d,  $J$  = 17.3 Hz, 1H), 0.81 – 0.53 (m, 3H), 0.50 – 0.33 (m, 1H).  $^{13}\text{C}$  NMR (101 MHz, Chloroform-*d*)  $\delta$  199.78, 199.72, 137.50, 137.36, 137.05, 133.07, 132.88, 129.84, 128.89, 128.72, 128.58, 128.55, 128.01, 127.37, 54.84, 45.33, 18.72, 9.18, 8.30. IR (thin film,  $\text{cm}^{-1}$ ) 3350, 3061, 3005, 2924, 2361, 2341, 1680, 1596, 1580, 1447, 1358, 1274, 1208, 1179, 1077, 1023, 978, 833, 751, 689, 652, 599, 513. HRMS (APCI) calcd for  $\text{C}_{25}\text{H}_{22}\text{O}_2$ : 354.1620, found 354.1612.



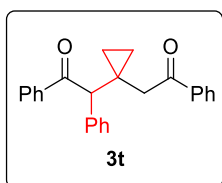

**3t:** 48% yield.  $^1\text{H NMR}$  (400 MHz, Chloroform-*d*)  $\delta$  8.10 – 7.99 (m, 2H), 7.91 (d,  $J = 7.5$  Hz, 2H), 7.54 (t,  $J = 7.4$  Hz, 1H), 7.49 (t,  $J = 7.3$  Hz, 1H), 7.40 (ddd,  $J = 22.0, 10.7, 7.2$  Hz, 6H), 7.30 (t,  $J = 7.3$  Hz, 2H), 7.26 (d,  $J = 7.0$  Hz, 1H), 5.40 (s, 1H), 3.26 (d,  $J = 17.2$  Hz, 1H), 2.99 (d,  $J = 17.3$  Hz, 1H), 0.68 (t,  $J = 6.2$  Hz, 1H), 0.64 – 0.57 (m, 2H), 0.50 – 0.35 (m, 1H).  $^{13}\text{C NMR}$  (101 MHz, Chloroform-*d*)  $\delta$  199.70, 199.64, 137.52, 137.38, 137.01, 132.96, 132.78, 129.78, 128.80, 128.50, 128.47, 127.95, 127.30, 54.84, 45.22, 18.73, 9.16, 8.28. IR (thin film,  $\text{cm}^{-1}$ ) 3060, 3005, 2918, 236, 2341, 1680, 1596, 1580, 1596, 1580, 1491, 1447, 1358, 1266, 1208, 1178, 1001, 833, 797, 751, 733, 688, 651, 599, 512. HRMS (APCI) calcd for  $\text{C}_{25}\text{H}_{22}\text{O}_2$ : 354.1620, found 354.1612.

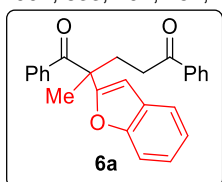

**6a:** 77% yield.  $^1\text{H NMR}$  (400 MHz, Chloroform-*d*)  $\delta$  7.86 – 7.80 (m, 2H), 7.62 (dd,  $J = 8.2, 1.4$  Hz, 2H), 7.59 – 7.55 (m, 1H), 7.50 (d,  $J = 7.4$  Hz, 1H), 7.38 (td,  $J = 10.0, 8.9, 6.9$  Hz, 4H), 7.29 – 7.21 (m, 4H), 6.74 (s, 1H), 3.04 (ddd,  $J = 16.1, 10.8, 5.0$  Hz, 1H), 2.87 (ddd,  $J = 16.4, 10.7, 5.4$  Hz, 1H), 2.75 – 2.51 (m, 2H), 1.75 (s, 3H).  $^{13}\text{C NMR}$  (101 MHz, Chloroform-*d*)  $\delta$  200.21, 199.41, 159.97, 154.66, 136.73, 136.57, 133.00, 132.20, 128.75, 128.54, 128.34, 128.28, 128.08, 124.19, 123.00, 120.94, 111.40, 103.06, 51.51, 33.90, 32.76, 23.12. IR (thin film,  $\text{cm}^{-1}$ ) 3085, 3060, 2981, 2933, 2360, 2341, 1679, 1596, 1578, 1449, 1365, 1251, 1239, 1212, 1169, 965, 941, 883, 750, 738, 689, 570. HRMS (APCI) calcd for  $\text{C}_{26}\text{H}_{22}\text{O}_3$ : 382.1569, found 382.1564.

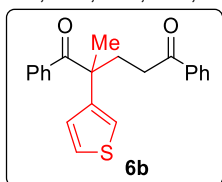

**6b:** 87% yield.  $^1\text{H NMR}$  (400 MHz, Chloroform-*d*)  $\delta$  7.86 – 7.76 (m, 2H), 7.55 – 7.48 (m, 3H), 7.40 (t,  $J = 7.6$  Hz, 3H), 7.33 (dd,  $J = 5.0, 2.9$  Hz, 1H), 7.26 (t,  $J = 7.8$  Hz, 2H), 7.21 (dd,  $J = 3.0, 1.4$  Hz, 1H), 6.96 (dd,  $J = 5.0, 1.4$  Hz, 1H), 2.85 (ddd,  $J = 26.6, 10.2, 5.9$  Hz, 2H), 2.50 (ddd,  $J = 10.3, 7.3, 5.5$  Hz, 2H), 1.66 (s, 3H).  $^{13}\text{C NMR}$  (101 MHz, Chloroform-*d*)  $\delta$  202.97, 199.81, 144.99, 136.85, 136.74, 132.99, 131.90, 129.20, 128.55, 128.16, 128.09, 126.76, 126.64, 120.46, 52.14, 34.48, 34.10, 24.57. IR (thin film,  $\text{cm}^{-1}$ ) 3062, 3025, 2974, 2931, 2360, 2341, 1673, 1596, 1579, 1447, 1365, 1280, 1242, 1211, 1179, 977, 929, 749, 714, 689, 666. HRMS (APCI) calcd for  $\text{C}_{22}\text{H}_{20}\text{O}_2\text{S}$ : 348.1184, found 348.1182.

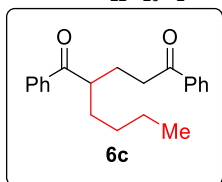

**6c:** 62% yield.  $^1\text{H NMR}$  (400 MHz, Chloroform-*d*)  $\delta$  8.03 – 7.95 (m, 2H), 7.95 – 7.86 (m, 2H), 7.60 – 7.49 (m, 2H), 7.44 (dt,  $J = 15.5, 7.6$  Hz, 4H), 3.60 (dtd,  $J = 8.6, 6.5, 4.8$  Hz, 1H), 3.17 – 2.98 (m, 1H), 2.85 (ddd,  $J = 17.1, 8.3, 6.6$  Hz, 1H), 2.34 – 2.14 (m, 1H), 2.14 – 1.96 (m, 1H), 1.86 – 1.73 (m, 1H), 1.53 (dd,  $J = 14.6, 6.7$  Hz, 1H), 1.29 (dq,  $J = 7.3, 3.9, 3.2$  Hz, 4H), 0.85 (q,  $J = 5.1, 3.6$  Hz, 3H).  $^{13}\text{C NMR}$  (101 MHz, Chloroform-*d*)  $\delta$  204.04, 199.92, 137.26, 136.79, 133.02, 132.99, 128.69, 128.53, 128.24, 128.00, 45.12, 35.91, 32.27, 29.51, 26.09, 22.81, 13.87. IR (thin film,  $\text{cm}^{-1}$ ) 3350, 3061, 2956, 2930, 2858, 173, 1683, 1597, 1580, 1448, 1345, 1270, 1224, 1180, 1124, 1074, 1001, 972, 752, 705, 689. HRMS (APCI) calcd for  $\text{C}_{21}\text{H}_{25}\text{O}_2$ : 309.1849, found 309.1851.

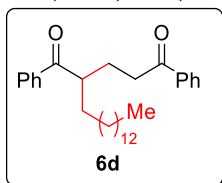

**6d:** 60% yield.  $^1\text{H NMR}$  (400 MHz, Chloroform-*d*)  $\delta$  7.97 (d,  $J = 7.7$  Hz, 2H), 7.90 (d,  $J = 7.7$  Hz, 2H), 7.54 (d,  $J = 9.3$  Hz, 2H), 7.47 – 7.33 (m, 4H), 3.60 (t,  $J = 6.7$  Hz, 1H), 3.05 (dd,  $J = 16.3, 8.0$  Hz, 1H), 2.92 – 2.77 (m, 1H), 2.31 – 2.13 (m, 1H), 2.02 (dd,  $J = 13.8, 6.9$  Hz, 1H), 1.80 (dd,  $J = 14.1, 7.2$  Hz, 1H), 1.51 (dt,  $J = 13.8, 6.7$  Hz, 1H), 1.23 (d,  $J = 13.0$  Hz, 24H), 0.88 (d,  $J = 6.4$  Hz, 3H).  $^{13}\text{C NMR}$  (101 MHz, Chloroform-*d*)  $\delta$  204.09, 199.97, 137.28, 136.81, 133.05, 133.03, 128.72, 128.57, 128.28, 128.04, 45.19, 35.96, 32.60, 31.94, 29.77, 29.70, 29.66, 29.63, 29.57, 29.43, 29.38, 27.38, 26.10, 22.71, 14.14. IR (thin film,  $\text{cm}^{-1}$ ) 2922, 2852, 2360, 2341, 1680, 1597, 1580, 1448, 1275, 1261, 1220, 972, 763, 689. HRMS (APCI) calcd for  $\text{C}_{31}\text{H}_{44}\text{O}_2$ : 448.3341, found 448.3340.

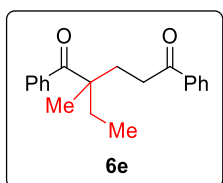

**6e:** >99% yield.  $^1\text{H NMR}$  (400 MHz, Chloroform-*d*)  $\delta$  7.88 (dd,  $J = 8.3, 1.4$  Hz, 2H), 7.81 – 7.67 (m, 2H), 7.57 – 7.50 (m, 1H), 7.47 (d,  $J = 7.4$  Hz, 1H), 7.45 – 7.36 (m, 4H), 2.90 (td,  $J = 10.4, 5.4$  Hz, 2H), 2.38 (ddd,  $J = 14.3, 10.8, 5.4$  Hz, 1H), 2.15 – 1.91 (m, 2H), 1.74 (dd,  $J = 14.3, 7.3$  Hz, 1H), 1.32 (s, 3H), 0.87 (t,  $J = 7.5$  Hz, 3H).  $^{13}\text{C NMR}$  (101 MHz, Chloroform-*d*)  $\delta$  208.28, 199.85, 139.16, 136.72, 133.08, 131.22, 128.59, 128.35, 128.08, 127.56, 51.31, 33.99, 33.37, 32.41, 22.34, 8.88. IR (thin film,  $\text{cm}^{-1}$ ) 3060, 2968, 2933, 2361, 2341, 1672, 1597, 1579, 1447, 1366, 1277, 1213, 1178, 1002, 970, 744, 717, 689, 655, 568. HRMS (APCI) calcd for  $\text{C}_{20}\text{H}_{22}\text{O}_2$ : 294.1620, found 294.1613.

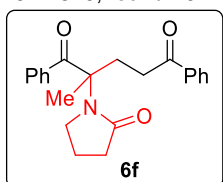

**6f:** 72% yield.  $^1\text{H NMR}$  (400 MHz, Chloroform-*d*)  $\delta$  7.93 (ddd,  $J = 8.5, 6.2, 1.8$  Hz, 4H), 7.44 (ddt,  $J = 36.3, 15.5, 7.3$  Hz, 6H), 3.84 – 3.60 (m, 2H), 3.21 – 2.95 (m, 2H), 2.48 (t,  $J = 7.5$  Hz, 2H), 2.28 – 2.01 (m, 4H), 1.61 (s, 3H).  $^{13}\text{C NMR}$  (101 MHz, Chloroform-*d*)  $\delta$  199.78, 198.32, 175.29, 136.61, 135.78, 133.14, 132.11, 128.58, 128.29, 128.16, 127.87, 65.16, 44.21, 33.83, 31.28, 31.12, 22.36, 18.76. IR (thin film,  $\text{cm}^{-1}$ ) 3350, 2983, 2920, 2360, 2341, 1675, 1596, 1579, 1447, 1411, 1276, 1261, 1179, 1147, 969, 745, 707, 690, 583, 483. HRMS (APCI) calcd for  $\text{C}_{22}\text{H}_{23}\text{NO}_3$ : 349.1678, found 349.1476.

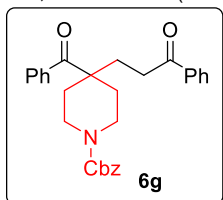

**6g:** 60% yield.  $^1\text{H NMR}$  (400 MHz, Chloroform-*d*)  $\delta$  8.10 – 7.84 (m, 2H), 7.82 – 7.70 (m, 2H), 7.67 – 7.48 (m, 2H), 7.44 (td,  $J = 7.6, 1.5$  Hz, 4H), 7.40 – 7.30 (m, 5H), 5.13 (s, 2H), 3.91 (s, 2H), 3.25 – 2.81 (m, 4H), 2.57 – 2.29 (m, 4H), 1.62 (s, 2H).  $^{13}\text{C NMR}$  (101 MHz, Chloroform-*d*)  $\delta$  206.71, 198.95, 155.27, 138.42, 136.78, 136.53, 133.30, 131.84, 128.65, 128.58, 128.51, 128.01, 127.88, 127.72, 67.10, 50.14, 41.12, 34.03, 32.96. IR (thin film,  $\text{cm}^{-1}$ ) 3058, 2923, 2872, 2360, 2341, 2278, 1684, 1597, 1430, 1360, 1277, 1215, 1146, 1092, 961, 733, 692, 456. HRMS (APCI) calcd for  $\text{C}_{29}\text{H}_{29}\text{NO}_4$ : 455.2097, found 455.2095.

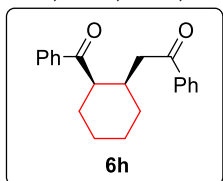

**6h:** 41% yield.  $^1\text{H NMR}$  (500 MHz, Chloroform-*d*)  $\delta$  7.91 (dd,  $J = 8.3, 1.4$  Hz, 2H), 7.80 (dd,  $J = 8.3, 1.4$  Hz, 2H), 7.57 – 7.52 (m, 1H), 7.46 (dt,  $J = 21.2, 7.5$  Hz, 3H), 7.35 (t,  $J = 7.8$  Hz, 2H), 3.71 (dt,  $J = 8.3, 4.3$  Hz, 1H), 3.09 (dd,  $J = 16.9, 8.5$  Hz, 1H), 2.93 (dd,  $J = 16.9, 5.1$  Hz, 1H), 2.73 (dd,  $J = 7.3, 3.9$  Hz, 1H), 1.92 (ddd,  $J = 14.4, 7.3, 3.8$  Hz, 2H), 1.76 (dd,  $J = 7.5, 3.8$  Hz, 1H), 1.63 (d,  $J = 9.0$  Hz, 3H), 1.56 – 1.37 (m, 2H).  $^{13}\text{C NMR}$  (126 MHz, Chloroform-*d*)  $\delta$  203.60, 199.76, 137.06, 136.79, 132.94, 132.88, 128.71, 128.49, 128.23, 128.05, 46.50, 38.76, 33.57, 29.25, 25.74, 23.71, 22.79. IR (thin film,  $\text{cm}^{-1}$ ) 3337, 3059, 29930, 2856, 1680, 1597, 1580, 1448, 1370, 1324, 1280, 1253, 1214, 1178, 1010, 981, 946, 854, 752, 700, 691, 662, 567. HRMS (APCI) calcd for  $\text{C}_{21}\text{H}_{23}\text{O}_2$ : 307.1693, found 307.1695.

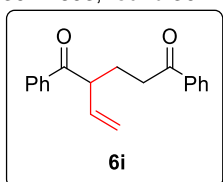

**6i:** 68% yield.  $^1\text{H NMR}$  (400 MHz, Chloroform-*d*)  $\delta$  8.12 – 7.98 (m, 2H), 7.98 – 7.85 (m, 2H), 7.69 – 7.51 (m, 2H), 7.51 – 7.37 (m, 4H), 5.94 (ddd,  $J = 17.1, 10.3, 8.7$  Hz, 1H), 5.34 – 5.09 (m, 2H), 4.25 (td,  $J = 8.4, 6.6$  Hz, 1H), 3.37 – 3.06 (m, 1H), 2.99 (ddd,  $J = 17.4, 7.2, 6.0$  Hz, 1H), 2.37 (dd,  $J = 13.9, 6.8$  Hz, 1H), 2.12 – 1.97 (m, 1H).  $^{13}\text{C NMR}$  (101 MHz, Chloroform-*d*)  $\delta$  200.64, 199.75, 136.91, 136.48, 133.16, 133.09, 129.26, 128.64, 128.61, 128.19, 128.02, 118.53, 50.58, 35.51, 26.19. IR (thin film,  $\text{cm}^{-1}$ ) 3060, 2922, 2852, 2360, 2341, 1678, 1634, 1596, 1579, 1447, 1364, 1276, 1278, 1179, 992, 924, 751, 699, 568. HRMS (APCI) calcd for  $\text{C}_{19}\text{H}_{18}\text{O}_2$ : 278.1307, found 278.1298.

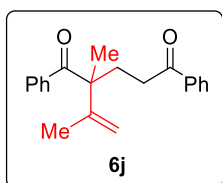

**6j**: 82% yield.  $^1\text{H NMR}$  (400 MHz, Chloroform-*d*)  $\delta$  8.08 – 7.96 (m, 2H), 7.88 – 7.79 (m, 2H), 7.58 – 7.47 (m, 2H), 7.47 – 7.29 (m, 4H), 5.14 (dt,  $J = 5.2, 1.1$  Hz, 2H), 2.94 – 2.72 (m, 2H), 2.32 (dddd,  $J = 47.6, 14.2, 11.0, 5.2$  Hz, 2H), 1.78 (s, 3H), 1.42 (s, 3H).  $^{13}\text{C NMR}$  (101 MHz, Chloroform-*d*)  $\delta$  203.44, 200.01, 148.00, 136.94, 136.83, 132.97, 132.33, 128.96, 128.56, 128.26, 128.07, 112.62, 55.67, 33.92, 31.63, 22.76, 20.67. IR (thin film,  $\text{cm}^{-1}$ ) 34743061, 2972, 2923, 2854, 2361, 2341, 1675, 1636, 1597, 1579, 1447, 1380, 1277, 1260, 1237, 1209, 1179, 966, 896, 747, 689, 578. HRMS (APCI) calcd for  $\text{C}_{21}\text{H}_{22}\text{O}_2$ : 306.1620, found 306.1613.

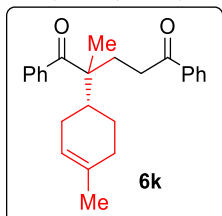

**6k**: >99% yield. 1.3:1 *d.r.*. Major diastereoisomer:  $^1\text{H NMR}$  (400 MHz, Chloroform-*d*)  $\delta$  7.91 – 7.85 (m, 2H), 7.84 – 7.80 (m, 2H), 7.57 – 7.47 (m, 2H), 7.44 – 7.38 (m, 4H), 5.38 (dt,  $J = 5.5, 1.9$  Hz, 1H), 3.01 – 2.83 (m, 2H), 2.51 – 2.25 (m, 2H), 2.23 – 1.83 (m, 5H), 1.62 (d,  $J = 2.2$  Hz, 3H), 1.53 – 1.32 (m, 2H), 1.24 (s, 3H).  $^{13}\text{C NMR}$  (101 MHz, Chloroform-*d*)  $\delta$  208.78, 199.87 (d,  $J = 7.6$  Hz), 139.49, 136.70, 134.10, 133.10, 131.16, 128.58, 128.37, 128.08, 127.59, 120.41, 54.09, 40.59, 33.98, 31.14, 26.24, 25.26, 23.32, 18.19. IR (thin film,  $\text{cm}^{-1}$ ) 3057, 2927, 2360, 2341, 1679, 1597, 1449, 1379, 1277, 1260, 1212, 1179, 976, 958, 746, 689, 591, 567, 430, 413. HRMS (APCI) calcd for  $\text{C}_{25}\text{H}_{28}\text{O}_2$ : 360.2089, found 360.2085.

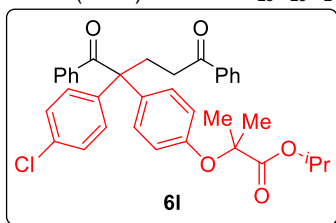

**6l**: 81% yield.  $^1\text{H NMR}$  (400 MHz, Chloroform-*d*)  $\delta$  7.77 – 7.70 (m, 2H), 7.58 – 7.46 (m, 3H), 7.39 – 7.17 (m, 11H), 6.81 (d,  $J = 8.8$  Hz, 2H), 5.04 (p,  $J = 6.3$  Hz, 1H), 2.90 – 2.65 (m, 4H), 1.59 (s, 6H), 1.14 (t,  $J = 6.9$  Hz, 6H).  $^{13}\text{C NMR}$  (101 MHz, Chloroform-*d*)  $\delta$  201.03, 199.67, 173.49, 154.70, 140.39, 137.11, 136.72, 133.88, 132.99, 132.95, 131.86, 130.62, 129.82, 128.56, 128.50, 127.98, 127.93, 118.55, 79.12, 68.99, 63.11, 35.73, 35.08, 25.44, 25.32, 21.55, 21.51. IR (thin film,  $\text{cm}^{-1}$ ) 3059, 298, 2933, 2360, 2341, 1906, 1727, 1677, 1597, 1579, 1507, 1491, 1447, 13117, 1280, 1246, 1178, 1149, 1100, 1002, 972, 930, 820, 744, 691, 585. HRMS (APCI) calcd for  $\text{C}_{36}\text{H}_{35}\text{ClO}_5$ : 582.2173, found 582.2168.

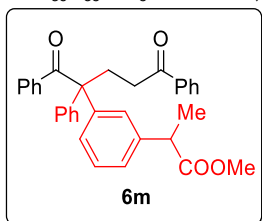

**6m**: >99% yield, 1.2:1 *d.r.*. Major diastereoisomer:  $^1\text{H NMR}$  (400 MHz, Chloroform-*d*)  $\delta$  7.79 – 7.73 (m, 2H), 7.57 (d,  $J = 7.8$  Hz, 2H), 7.53 – 7.40 (m, 3H), 7.39 – 7.23 (m, 9H), 7.24 – 7.12 (m, 3H), 3.66 (q,  $J = 7.0$  Hz, 1H), 3.55 (s, 3H), 2.90 – 2.70 (m, 4H), 1.41 (d,  $J = 7.2$  Hz, 3H).  $^{13}\text{C NMR}$  (101 MHz, Chloroform-*d*)  $\delta$  201.25, 199.89, 174.68, 141.76, 141.29, 140.72, 140.62, 137.31, 136.89, 132.86, 131.68, 129.95, 129.22, 129.02, 128.77, 128.55, 128.45, 128.02, 127.80, 127.21, 126.06, 64.32, 51.95, 45.46, 45.36, 35.22, 18.50. IR (thin film,  $\text{cm}^{-1}$ ) 3057, 2982, 2937, 2360, 2341, 1733, 1676, 1597, 1580, 1489, 1434, 1263, 1222, 1168, 1068, 969, 750, 734, 700, 572. HRMS (APCI) calcd for  $\text{C}_{33}\text{H}_{30}\text{O}_4$ : 490.2144, found 490.2140.

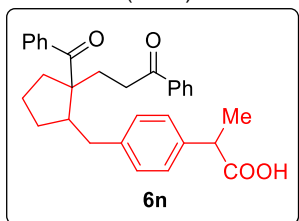

**6n**: 93% yield, 3.0:1 *d.r.*. Major diastereoisomer:  $^1\text{H NMR}$  (400 MHz, Chloroform-*d*)  $\delta$  7.89 (d,  $J = 7.6$  Hz, 2H), 7.79 (d,  $J = 7.2$  Hz, 2H), 7.57 – 7.35 (m, 6H), 7.18 (d,  $J = 8.0$  Hz, 2H), 7.08 (d,  $J = 7.9$  Hz, 2H), 3.71 – 3.62 (m, 4H), 3.08 – 2.83 (m, 2H), 2.70 – 2.50 (m, 3H), 2.40 (t,  $J = 12.5$  Hz, 1H), 2.25 – 2.04 (m, 1H), 1.71 (dddd,  $J = 68.5, 12.4, 9.6, 6.6$  Hz, 4H), 1.47 (dd,  $J = 7.2, 2.0$  Hz, 3H).  $^{13}\text{C NMR}$  (101 MHz, Chloroform-*d*)  $\delta$  206.86, 199.91, 175.14, 140.10, 138.12, 137.91, 136.69, 133.13, 131.49, 129.14, 128.61, 128.38,

128.10, 128.01, 127.43, 61.11, 52.02, 48.81, 45.01, 35.85, 35.08, 29.93, 27.94, 22.43, 18.61. IR (thin film,  $\text{cm}^{-1}$ ) 3056, 2949, 2874, 2360, 2341, 1734, 1669, 1596, 1579, 1512, 1435, 1260, 1207, 1165, 1066, 1001, 970, 859, 748, 690, 567, 538. HRMS (APCI) calcd for  $\text{C}_{31}\text{H}_{32}\text{O}_4$ : 468.2301, found 468.2236.

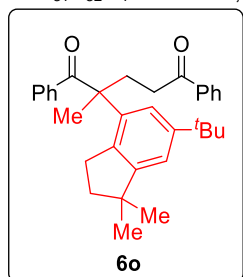

**6o**: >99% yield.  $^1\text{H}$  NMR (400 MHz, Chloroform-*d*)  $\delta$  7.85 – 7.73 (m, 2H), 7.60 – 7.54 (m, 2H), 7.54 – 7.46 (m, 1H), 7.41 – 7.33 (m, 4H), 7.20 (dd,  $J = 8.3, 7.4$  Hz, 2H), 7.10 (d,  $J = 1.7$  Hz, 1H), 2.83 (ddd,  $J = 9.6, 5.9, 4.8$  Hz, 2H), 2.63 – 2.42 (m, 4H), 1.76 – 1.64 (m, 5H), 1.38 (s, 9H), 1.11 (d,  $J = 16.9$  Hz, 6H).  $^{13}\text{C}$  NMR (101 MHz, Chloroform-*d*)  $\delta$  203.57, 200.16, 154.09, 150.56, 139.14, 137.86, 136.79, 136.38, 132.90, 132.10, 129.19, 128.51, 128.06, 128.00, 117.61, 117.61, 54.39, 43.15, 41.39, 34.96, 33.99, 32.79, 31.71, 29.28, 28.39, 23.94. IR (thin film,  $\text{cm}^{-1}$ ) 3086, 3062, 2953, 2862, 2360, 2341, 1676, 1597, 1589, 1447, 1361, 1277, 1259, 1236, 1179, 976, 953, 749, 716, 689, 605. HRMS (APCI) calcd for  $\text{C}_{31}\text{H}_{38}\text{O}_2$ : 466.2872, found 466.2866.

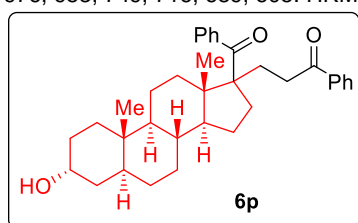

**6p**: 49% yield.  $^1\text{H}$  NMR (400 MHz, Chloroform-*d*)  $\delta$  7.85 (d,  $J = 8.0$  Hz, 2H), 7.62 (d,  $J = 7.7$  Hz, 2H), 7.55 – 7.29 (m, 6H), 4.02 (d,  $J = 7.8$  Hz, 1H), 2.79 – 2.46 (m, 3H), 2.17 – 1.09 (m, 23H), 1.00 (s, 3H), 0.84 – 0.71 (m, 4H).  $^{13}\text{C}$  NMR (101 MHz, Chloroform-*d*)  $\delta$  208.27, 200.03, 140.71, 136.54, 133.01, 131.41, 128.51, 128.49, 128.29, 127.96, 66.50, 66.08, 53.56, 51.26, 48.19, 39.04, 36.89, 36.05, 35.85, 35.19, 34.56, 32.09, 31.99, 30.79, 28.96, 28.51, 25.17, 20.92, 16.73, 16.34, 11.17. IR (thin film,  $\text{cm}^{-1}$ ) 3368, 2921, 2853, 2360, 2341, 1681, 1660, 1597, 1447, 1262, 1210, 1178, 1009, 966, 748, 691. HRMS (APCI) calcd for  $\text{C}_{35}\text{H}_{44}\text{O}_3$ : 512.3290, found 512.3280.

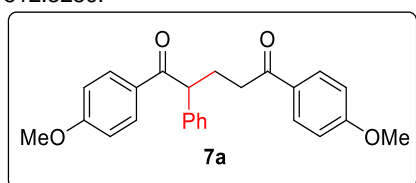

**7a**: >99% yield.  $^1\text{H}$  NMR (400 MHz, Chloroform-*d*)  $\delta$  8.04 – 7.94 (m, 2H), 7.94 – 7.84 (m, 2H), 7.34 – 7.25 (m, 4H), 7.23 – 7.16 (m, 1H), 6.94 – 6.81 (m, 4H), 4.72 (t,  $J = 7.3$  Hz, 1H), 3.82 (d,  $J = 16.9$  Hz, 6H), 3.04 – 2.93 (m, 1H), 2.86 (dt,  $J = 16.7, 6.7$  Hz, 1H), 2.58 (dt,  $J = 14.0, 7.2$  Hz, 1H), 2.25 (dt,  $J = 13.9, 6.9$  Hz, 1H).  $^{13}\text{C}$  NMR (101 MHz, Chloroform-*d*)  $\delta$  198.53, 198.13, 163.36, 163.28, 139.65, 131.03, 130.28, 129.92, 129.64, 128.90, 128.22, 127.02, 113.64, 113.62, 55.38, 55.34, 52.10, 35.71, 28.61. IR (thin film,  $\text{cm}^{-1}$ ) 3061, 2962, 2935, 2839, 1671, 1600, 1574, 1510, 1454, 1419, 1363, 1313, 1259, 1163, 1114, 1029, 982, 837, 752, 702. HRMS (APCI) calcd for  $\text{C}_{25}\text{H}_{25}\text{O}_4$ : 389.1747, found 389.1750.

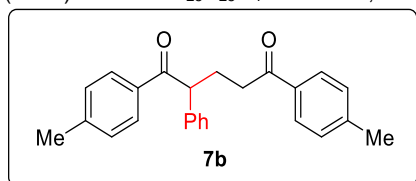

**7b**: 87% yield.  $^1\text{H}$  NMR (400 MHz, Chloroform-*d*)  $\delta$  7.89 (d,  $J = 8.2$  Hz, 2H), 7.81 (d,  $J = 8.1$  Hz, 2H), 7.35 – 7.27 (m, 4H), 7.24 – 7.15 (m, 5H), 4.76 (t,  $J = 7.3$  Hz, 1H), 3.05 – 2.82 (m, 2H), 2.59 (dt,  $J = 14.1, 7.2$  Hz, 1H), 2.39 (s, 3H), 2.34 (s, 3H), 2.32 – 2.22 (m, 1H).  $^{13}\text{C}$  NMR (101 MHz, Chloroform-*d*)  $\delta$  199.56, 199.21, 143.72, 143.66, 139.41, 134.35, 134.13, 129.18, 129.16, 128.93, 128.87, 128.27, 128.12, 127.07, 52.29, 35.89, 28.38, 21.56, 21.52. IR (thin film,  $\text{cm}^{-1}$ ) 3337, 3060, 3029, 2925, 1923, 1679, 1606, 1572, 1492, 1453, 1408, 1365, 1277, 1227, 1179, 1119, 1072, 102, 977, 842, 790, 750, 701, 566, 519. HRMS (APCI) calcd for  $\text{C}_{25}\text{H}_{25}\text{O}_2$ : 357.1849, found 357.1852.

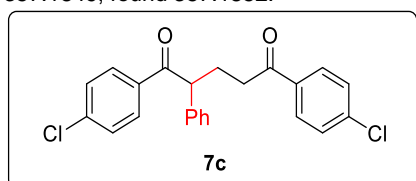

**7c:** 76% yield.  $^1\text{H NMR}$  (400 MHz, Chloroform-*d*)  $\delta$  7.92 (d,  $J = 8.4$  Hz, 2H), 7.85 (d,  $J = 8.4$  Hz, 2H), 7.42 (d,  $J = 8.4$  Hz, 2H), 7.36 (d,  $J = 8.6$  Hz, 2H), 7.32 – 7.22 (m, 5H), 4.71 (t,  $J = 7.3$  Hz, 1H), 3.06 – 2.82 (m, 2H), 2.58 (dd,  $J = 14.1, 7.1$  Hz, 1H), 2.27 (dd,  $J = 14.0, 6.9$  Hz, 1H).  $^{13}\text{C NMR}$  (101 MHz, Chloroform-*d*)  $\delta$  198.58, 198.27, 139.53, 139.39, 138.72, 135.04, 134.80, 130.17, 129.42, 129.18, 128.88, 128.83, 128.21, 127.43, 52.44, 35.79, 28.06. IR (thin film,  $\text{cm}^{-1}$ ) 3350, 3062, 3028, 2959, 2933, 1684, 1588, 1570, 1489, 1399, 1366, 1276, 1221, 1175, 1093, 1013, 984, 827, 766, 748, 700, 569, 533, 517. HRMS (APCI) calcd for  $\text{C}_{23}\text{H}_{19}\text{O}_2\text{Cl}_2$ : 397.0757, found 397.0760.

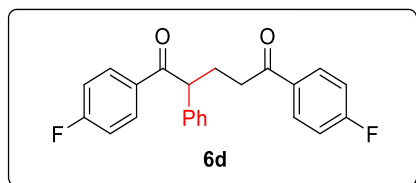

**6d:** 85% yield.  $^1\text{H NMR}$  (400 MHz, Chloroform-*d*)  $\delta$  8.02 – 7.92 (m, 2H), 7.92 – 7.82 (m, 2H), 7.25 (d,  $J = 6.4$  Hz, 4H), 7.20 – 7.15 (m, 1H), 7.03 (dt,  $J = 21.6, 8.7$  Hz, 4H), 4.68 (t,  $J = 7.3$  Hz, 1H), 3.05 – 2.77 (m, 2H), 2.53 (dq,  $J = 14.3, 7.2$  Hz, 1H), 2.23 (dt,  $J = 13.9, 7.0$  Hz, 1H).  $^{13}\text{C NMR}$  (101 MHz, Chloroform-*d*)  $\delta$  198.27, 197.98, 166.93 (d,  $J = 17.3$  Hz), 164.40 (d,  $J = 17.6$  Hz), 138.97, 133.23 (d,  $J = 3.0$  Hz), 132.96 (d,  $J = 2.9$  Hz), 131.46 (d,  $J = 9.3$  Hz), 130.68 (d,  $J = 9.3$  Hz), 129.19, 128.26, 127.41, 115.78 (d,  $J = 2.3$  Hz), 115.56 (d,  $J = 2.2$  Hz), 52.44, 35.82, 28.26.  $^{19}\text{F NMR}$  (377 MHz, Chloroform-*d*)  $\delta$  -105.15, -105.19. IR (thin film,  $\text{cm}^{-1}$ ) 3345, 3064, 3029, 2933, 1683, 1597, 1506, 1454, 1409, 1367, 1272, 1230, 1156, 1099, 1012, 985, 842, 752, 702, 606, 566, 521. HRMS (APCI) calcd for  $\text{C}_{23}\text{H}_{19}\text{O}_2\text{F}_2$ : 365.1348, found 365.1348.

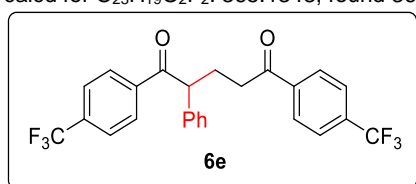

**6e:** 82% yield.  $^1\text{H NMR}$  (400 MHz, Chloroform-*d*)  $\delta$  8.04 (d,  $J = 8.1$  Hz, 2H), 7.98 (d,  $J = 8.0$  Hz, 2H), 7.68 (d,  $J = 8.1$  Hz, 2H), 7.62 (d,  $J = 8.1$  Hz, 2H), 7.27 (dq,  $J = 15.4, 7.7$  Hz, 5H), 4.74 (t,  $J = 7.3$  Hz, 1H), 2.98 (q,  $J = 7.0$  Hz, 2H), 2.58 (dq,  $J = 14.2, 7.1$  Hz, 1H), 2.30 (dt,  $J = 14.0, 7.0$  Hz, 1H).  $^{13}\text{C NMR}$  (101 MHz, Chloroform-*d*)  $\delta$  198.79, 198.48, 139.35, 139.18, 138.28, 134.51 (d,  $J = 25.0$  Hz), 134.18 (d,  $J = 25.2$  Hz), 129.37, 129.11, 128.37, 128.28, 127.69, 125.65 (q,  $J = 3.7$  Hz), 125.69 (q,  $J = 3.7$  Hz), 123.57 (d,  $J = 272.7$  Hz), 123.51 (d,  $J = 272.7$  Hz), 52.80, 36.07, 27.86.  $^{19}\text{F NMR}$  (377 MHz, Chloroform-*d*)  $\delta$  -63.14, -63.21. IR (thin film,  $\text{cm}^{-1}$ ) 3064, 3029, 2936, 1689, 1600, 1582, 1512, 1454, 1410, 1326, 1275, 1221, 1169, 1130, 1067, 1016, 987, 856, 833, 746, 725, 600. HRMS (APCI) calcd for  $\text{C}_{25}\text{H}_{19}\text{O}_2\text{F}_6$ : 465.1284, found 465.1288.

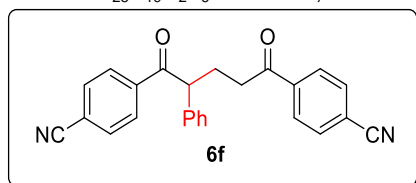

**6f:** 72% yield.  $^1\text{H NMR}$  (400 MHz, Chloroform-*d*)  $\delta$  8.02 (d,  $J = 8.1$  Hz, 2H), 7.98 (d,  $J = 8.1$  Hz, 2H), 7.74 (d,  $J = 8.1$  Hz, 2H), 7.67 (d,  $J = 8.2$  Hz, 2H), 7.31 (t,  $J = 7.1$  Hz, 2H), 7.24 (dd,  $J = 9.8, 7.9$  Hz, 3H), 4.71 (t,  $J = 7.3$  Hz, 1H), 2.98 (td,  $J = 6.8, 3.5$  Hz, 2H), 2.57 (dd,  $J = 14.1, 7.1$  Hz, 1H), 2.29 (dd,  $J = 14.1, 7.1$  Hz, 1H).  $^{13}\text{C NMR}$  (101 MHz, Chloroform-*d*)  $\delta$  198.27, 197.99, 139.51, 139.40, 137.83, 132.49, 132.37, 129.42, 129.10, 128.37, 128.19, 127.80, 117.81, 117.78, 116.44, 116.17, 52.76, 35.94, 27.60. IR (thin film,  $\text{cm}^{-1}$ ) 3359, 3062, 2930, 2230, 1688, 1606, 1566, 1491, 1453, 1404, 1368, 1312, 1272, 1219, 1175, 1113, 1031, 987, 834, 739, 703, 576, 546. HRMS (APCI) calcd for  $\text{C}_{25}\text{H}_{19}\text{O}_2\text{N}_2$ : 379.1441, found 379.1445.

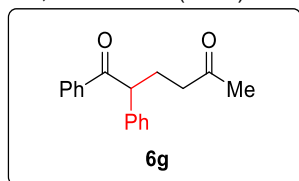

**6g:** 90% yield (400 nm).  $^1\text{H NMR}$  (400 MHz, Chloroform-*d*)  $\delta$  8.01 – 7.93 (m, 2H), 7.51 – 7.44 (m, 1H), 7.37 (dd,  $J = 8.3, 6.8$  Hz, 2H), 7.33 – 7.24 (m, 4H), 7.24 – 7.17 (m, 1H), 4.70 – 4.59 (m, 1H), 2.47 – 2.31 (m, 3H), 2.18 – 2.09 (m, 1H), 2.08 (s, 3H).  $^{13}\text{C NMR}$  (101 MHz, Chloroform-*d*)  $\delta$  208.38, 199.47, 138.96, 136.57, 132.89, 128.98, 128.68, 128.48, 128.24, 127.19, 52.18, 40.91, 29.92, 27.60. IR (thin film,  $\text{cm}^{-1}$ ) 3084, 3027, 2961, 2933, 1714, 1680, 1597, 1490, 1368, 1269, 1176, 1159, 1072, 756, 699. HRMS (APCI) calcd for  $\text{C}_{18}\text{H}_{19}\text{O}_2$ : 267.1380, found 267.1382.

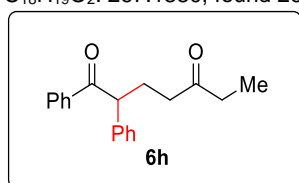

**6h**: 89% yield (400 nm).  $^1\text{H}$  NMR (400 MHz, Chloroform-*d*)  $\delta$  7.95 (dd,  $J$  = 8.4, 1.4 Hz, 2H), 7.50 – 7.44 (m, 1H), 7.37 (dd,  $J$  = 8.3, 6.9 Hz, 2H), 7.28 (d,  $J$  = 5.6 Hz, 4H), 7.20 (td,  $J$  = 5.6, 3.1 Hz, 1H), 4.67 (dd,  $J$  = 8.0, 6.0 Hz, 1H), 2.56 – 2.28 (m, 5H), 2.22 – 2.03 (m, 1H), 1.02 (t,  $J$  = 7.3 Hz, 3H).  $^{13}\text{C}$  NMR (101 MHz, Chloroform-*d*)  $\delta$  211.15, 199.61, 139.08, 136.71, 132.91, 129.01, 128.73, 128.52, 128.33, 127.21, 52.30, 39.59, 35.93, 27.75, 7.82. IR (thin film,  $\text{cm}^{-1}$ ) 3361, 3184, 3061, 2972, 2921, 2851, 2361, 2341, 1710, 1678, 1597, 1492, 1447, 1371, 1342, 1262, 1176, 1160, 1115, 1073, 982, 955, 832, 756, 666, 570, 517. HRMS (APCI) calcd for  $\text{C}_{19}\text{H}_{20}\text{O}_2$ : 280.1463, found 280.1458.

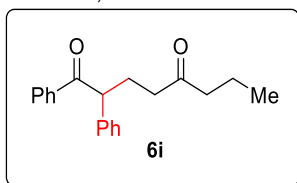

**6i**: 80% yield (400 nm).  $^1\text{H}$  NMR (400 MHz, Chloroform-*d*)  $\delta$  8.02 – 7.88 (m, 2H), 7.49 – 7.42 (m, 1H), 7.37 (dd,  $J$  = 8.4, 6.9 Hz, 2H), 7.28 (d,  $J$  = 5.5 Hz, 4H), 7.23 – 7.09 (m, 1H), 4.72 – 4.61 (m, 1H), 2.49 – 2.34 (m, 3H), 2.31 (t,  $J$  = 7.3 Hz, 2H), 2.11 (d,  $J$  = 7.2 Hz, 1H), 1.56 (q,  $J$  = 7.4 Hz, 2H), 0.87 (t,  $J$  = 7.4 Hz, 3H).  $^{13}\text{C}$  NMR (101 MHz, Chloroform-*d*)  $\delta$  210.74, 199.63, 139.08, 136.73, 132.91, 129.00, 128.73, 128.52, 128.33, 127.21, 52.28, 44.77, 40.00, 27.71, 17.28, 13.72. IR (thin film,  $\text{cm}^{-1}$ ) 3360, 3184, 2960, 2921, 2851, 2361, 2341, 1708, 1678, 1597, 1447, 1261, 1159, 1126, 959, 753, 697, 570, 517. HRMS (APCI) calcd for  $\text{C}_{20}\text{H}_{22}\text{O}_2$ : 294.1620, found 294.1611.

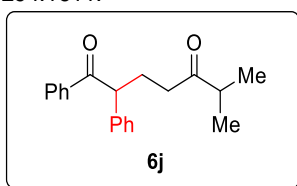

**6j**: 90% yield (400 nm).  $^1\text{H}$  NMR (400 MHz, Chloroform-*d*)  $\delta$  8.05 – 7.88 (m, 2H), 7.52 – 7.43 (m, 1H), 7.37 (ddd,  $J$  = 8.2, 6.7, 1.4 Hz, 2H), 7.28 (d,  $J$  = 5.0 Hz, 4H), 7.20 (ddd,  $J$  = 6.5, 4.7, 3.4 Hz, 1H), 4.69 (t,  $J$  = 7.2 Hz, 1H), 2.73 – 2.30 (m, 4H), 2.12 (dd,  $J$  = 7.0, 5.6 Hz, 1H), 1.03 (dd,  $J$  = 7.0, 6.0 Hz, 6H).  $^{13}\text{C}$  NMR (101 MHz, Chloroform-*d*)  $\delta$  214.41, 199.72, 139.09, 136.76, 132.90, 128.97, 128.73, 128.52, 128.36, 127.19, 52.19, 40.83, 37.55, 27.70, 18.29, 18.23. IR (thin film,  $\text{cm}^{-1}$ ) 3360, 3184, 2964, 2921, 2851, 2361, 2340, 1707, 1678, 1597, 1468, 1447, 1324, 1274, 1176, 1073, 1011, 957, 753, 697, 582, 515. HRMS (APCI) calcd for  $\text{C}_{20}\text{H}_{22}\text{O}_2$ : 294.1620, found 194.1613

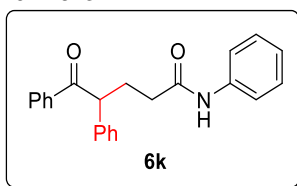

**6k**: 49% yield.  $^1\text{H}$  NMR (500 MHz, Chloroform-*d*)  $\delta$  7.87 (d,  $J$  = 7.7 Hz, 2H), 7.38 (t,  $J$  = 7.9 Hz, 3H), 7.32 – 7.18 (m, 9H), 7.13 (dq,  $J$  = 6.2, 2.7 Hz, 1H), 7.01 (t,  $J$  = 7.4 Hz, 1H), 4.69 (t,  $J$  = 7.2 Hz, 1H), 2.53 – 2.41 (m, 1H), 2.31 – 2.15 (m, 3H).  $^{13}\text{C}$  NMR (126 MHz, Chloroform-*d*)  $\delta$  198.71, 169.69, 137.85, 136.80, 135.47, 132.02, 128.05, 127.95, 127.77, 127.53, 127.32, 126.28, 123.22, 118.84, 51.34, 33.87, 28.31. IR (thin film,  $\text{cm}^{-1}$ ) 3084, 3027, 2961, 2933, 1713, 1680, 1597, 1580, 1490, 1369, 1269, 1176, 1160, 1072, 1001, 756, 699. HRMS (APCI) calcd for  $\text{C}_{23}\text{H}_{21}\text{NO}_2$ : 343.1572, found 343.1564.

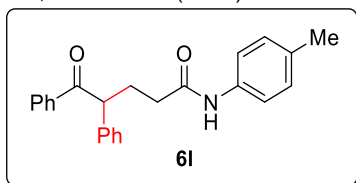

**6l**: 39% yield.  $^1\text{H}$  NMR (400 MHz, Chloroform-*d*)  $\delta$  8.06 – 7.87 (m, 2H), 7.50 – 7.43 (m, 1H), 7.41 – 7.26 (m, 8H), 7.21 (dq,  $J$  = 7.8, 2.7 Hz, 1H), 7.10 (d,  $J$  = 7.9 Hz, 3H), 4.77 (t,  $J$  = 7.0 Hz, 1H), 2.54 (d,  $J$  = 7.2 Hz, 1H), 2.44 – 2.15 (m, 6H).  $^{13}\text{C}$  NMR (101 MHz, Chloroform-*d*)  $\delta$  199.74, 170.52, 138.93, 136.61, 135.24, 133.93, 133.00, 129.48, 129.07, 128.80, 128.55, 128.39, 127.30, 120.00, 52.39, 34.90, 29.40, 20.84. IR (thin film,  $\text{cm}^{-1}$ ) 3305, 3124, 3060, 2923, 2854, 2361, 2341, 1678, 1659, 1598, 1531, 1448, 1405, 1311, 1260, 1178, 968, 817, 750, 698, 573, 507. HRMS (APCI) calcd for  $\text{C}_{24}\text{H}_{23}\text{NO}_2$ : 357.1729, found 357.1722.

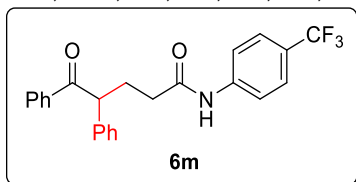

**6m**: 58% yield.  $^1\text{H}$  NMR (400 MHz, Chloroform-*d*)  $\delta$  8.01 – 7.94 (m, 2H), 7.69 – 7.56 (m, 4H), 7.55 – 7.46 (m, 2H), 7.40 (dd,  $J$  = 8.4, 7.1 Hz, 2H), 7.32 (d,  $J$  = 4.4 Hz, 4H), 7.25 (q,  $J$  = 4.5 Hz, 1H), 4.78 (t,  $J$  = 7.1 Hz, 1H), 2.60 – 2.50 (m, 1H), 2.41 (dt,  $J$  = 10.4, 6.8 Hz, 2H), 2.34 – 2.25 (m, 1H).  $^{13}\text{C}$  NMR (101 MHz, Chloroform-*d*)  $\delta$  199.71, 170.99, 140.90, 138.80, 136.47, 133.15, 129.16, 128.80, 128.60, 128.28, 127.43, 126.28, 126.24, 119.31, 52.50, 35.13, 29.70, 29.26. IR (thin film,  $\text{cm}^{-1}$ ) 3307, 3063, 2924, 2854, 1359, 2341,

1667, 1604, 1533, 1448, 1408, 1320, 1259, 1162, 1112, 1066, 1016, 841, 750, 697, 594, 509, 414. HRMS (APCI) calcd for  $C_{24}H_{20}F_3NO_2$ : 411.1446, found 411.1438.

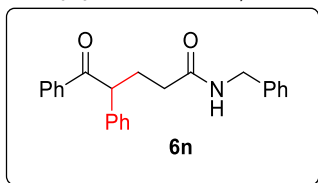

**6n**: 79% yield.  $^1H$  NMR (400 MHz, Chloroform-*d*)  $\delta$  7.96 (d,  $J = 7.5$  Hz, 2H), 7.49 (d,  $J = 7.6$  Hz, 1H), 7.40 (t,  $J = 7.7$  Hz, 2H), 7.35 – 7.27 (m, 9H), 7.25 – 7.20 (m, 1H), 5.71 (d,  $J = 6.3$  Hz, 1H), 4.75 (t,  $J = 6.7$  Hz, 1H), 4.44 (dd,  $J = 8.9, 5.7$  Hz, 2H), 2.50 (dd,  $J = 9.1, 4.9$  Hz, 1H), 2.35 – 2.09 (m, 3H).  $^{13}C$  NMR (101 MHz, Chloroform-*d*)  $\delta$  199.76, 172.27, 139.07, 138.44, 136.78, 133.09, 129.15, 128.90, 128.87, 128.67, 128.50, 128.00, 127.69, 127.37, 52.49, 43.77, 34.10, 29.68. IR (thin film,  $cm^{-1}$ ) 3292, 3062, 3005, 2922, 2853, 2361, 2340, 1676, 1644, 1597, 1579, 1539, 1493, 1448, 1356, 1301, 1275, 1260, 1228, 1158, 1077, 1029, 750, 695, 573, 504. HRMS (APCI) calcd for  $C_{24}H_{23}NO_2$ : 357.1729, found 357.1720.

## References

- [1] D. D. Perrin, W. L. F. Armarego, *Purification of Laboratory Chemicals*; 3<sup>rd</sup>ed., Pergamon Press, Oxford, **1988**
- [2] A. B. Pangborn, M. A. Giardello, R. H. Grubbs, R. K. Rosen, F. J. Timmers, *Organometallics*, **1996**, *15*, 1518.
- [3] B. R. William, D. A. Watson. *Org. Lett.* **2018**, *20*, 6832.
- [4] T. W. Liwosz, S. R. Chemler, *J. Am. Chem. Soc.* **2012**, *134*, 2020.
- [5] Z. An, Y. Liu, Y. Sun, R. Yan, *Chem. Asian. J.* **2020**, *15*, 3812–3815.
- [6] R. Martinez-Haya, L. Marzo, B. König, *Chem. Commun.* **2018**, *54*, 11602.
- [7] J. K. Vandavasi, C.-T. Hsiao, W.-P. Hu, S. S. K. Boominathan, J.-J. Wang, *Eur. J. Org. Chem.* **2015**, 3171.



# NMR spectra

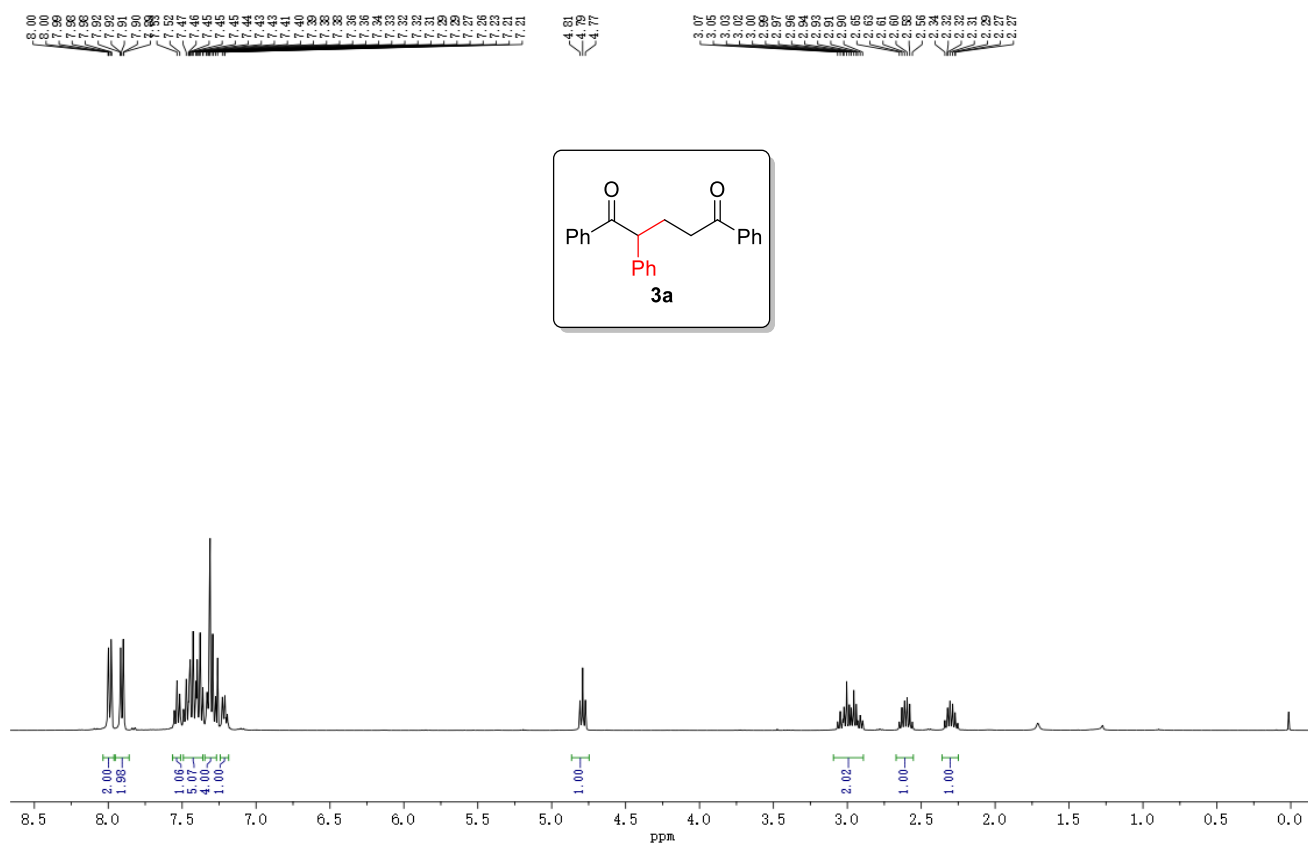

199.85  
199.57

139.11  
136.77  
136.59  
132.99  
132.88  
132.79  
129.19  
128.51  
128.47  
128.28  
127.98  
127.18

77.32  
77.00  
76.88

52.40

35.93

28.26

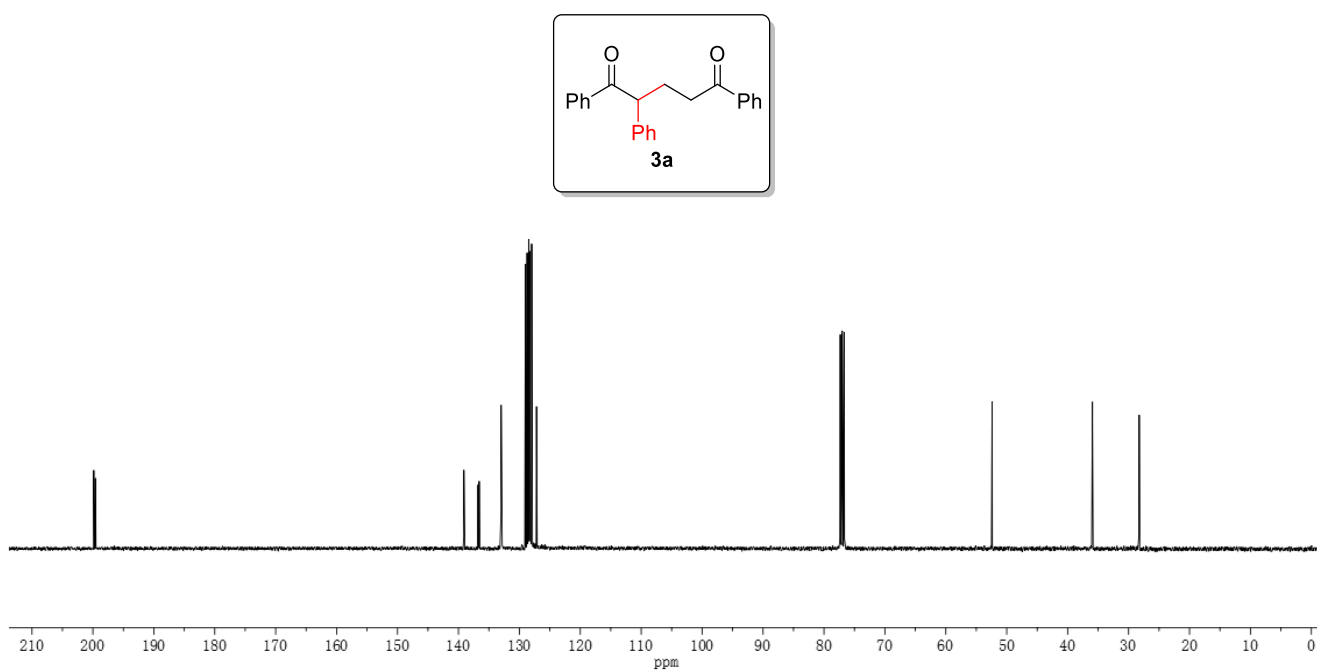



7.59  
7.57  
7.51  
7.01  
7.00  
6.99  
6.99  
6.94  
6.94  
6.92  
6.92  
6.46  
6.46  
6.42  
6.42  
6.41  
6.40  
6.38  
6.38  
6.32  
6.36  
6.26  
6.18  
6.16  
6.11  
6.10  
6.03  
6.01

4.75  
4.73  
4.71

2.06  
2.04  
2.02  
2.02  
2.00  
2.00  
1.95  
1.94  
1.92  
1.92  
1.91  
1.89  
1.89  
1.60  
1.59  
1.57  
1.55  
1.55  
1.39  
1.39

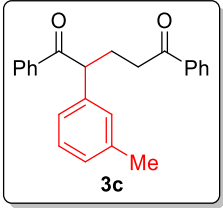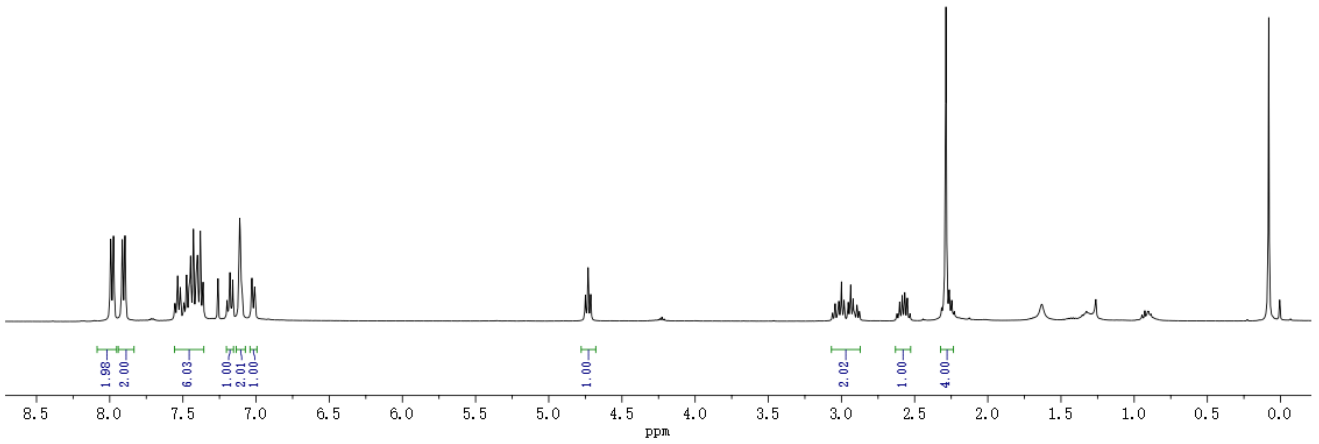

200.00  
196.69

139.08  
138.50  
138.50  
136.75  
133.03  
132.50  
128.90  
128.81  
128.57  
128.52  
128.06  
128.05  
126.52

77.07  
77.05  
76.73

52.45

35.06

28.39

21.42

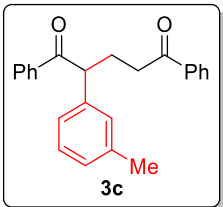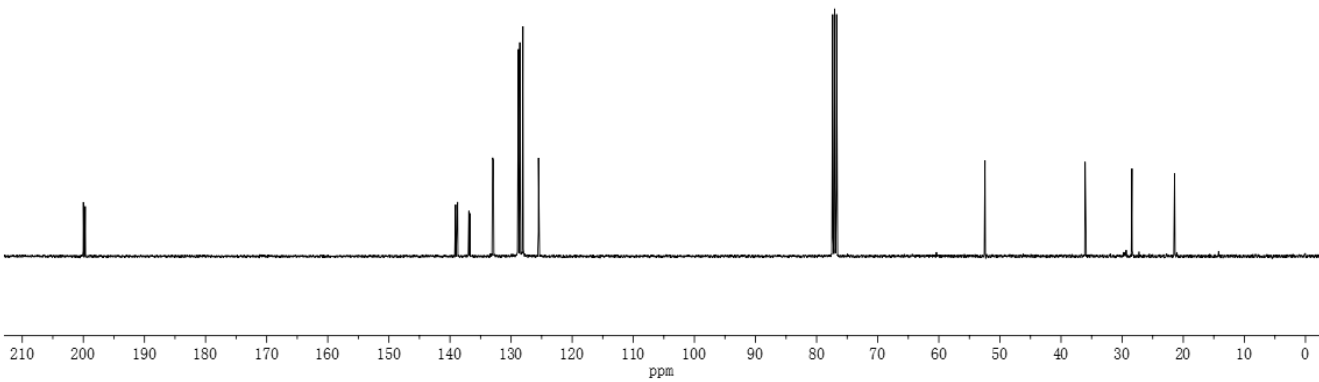

7.89  
7.87  
7.97  
7.91  
7.90  
7.89  
7.52  
7.52  
7.51  
7.51  
7.49  
7.47  
7.47  
7.45  
7.44  
7.44  
7.41  
7.40  
7.40  
7.38  
7.38  
7.26  
7.23  
7.22  
7.21  
6.83  
6.82  
6.81

4.75  
4.73  
4.71

3.74  
3.03  
3.01  
2.99  
2.97  
2.96  
2.94  
2.93  
2.92  
2.90  
2.89  
2.87  
2.85  
2.84  
2.83  
2.82

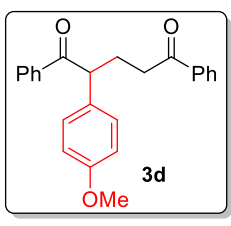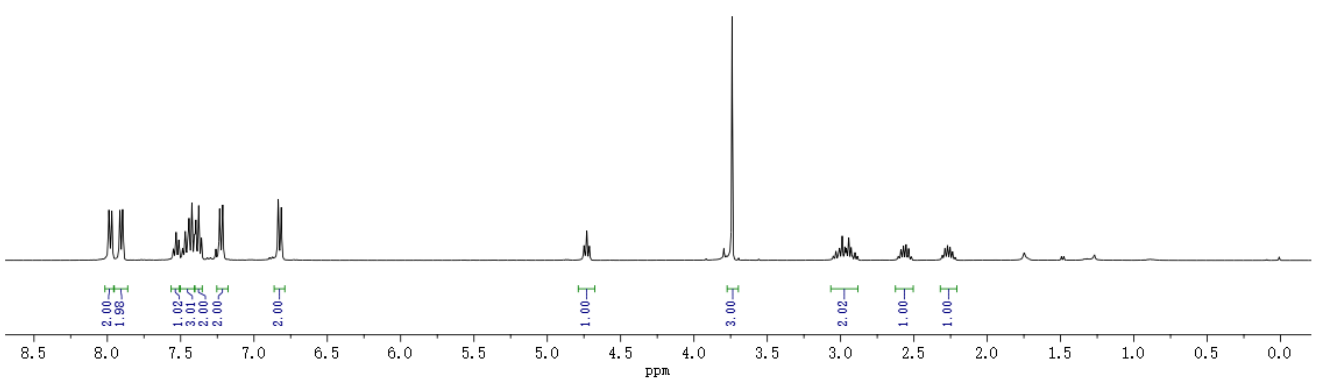

199.94  
199.79

158.87

136.85  
136.61  
132.88  
132.81  
131.00  
129.33  
128.50  
128.45  
127.98

114.40

77.32  
77.00  
76.88

55.13  
51.48

35.90

28.22

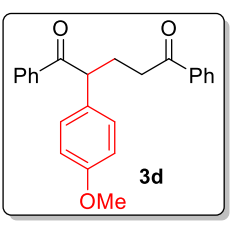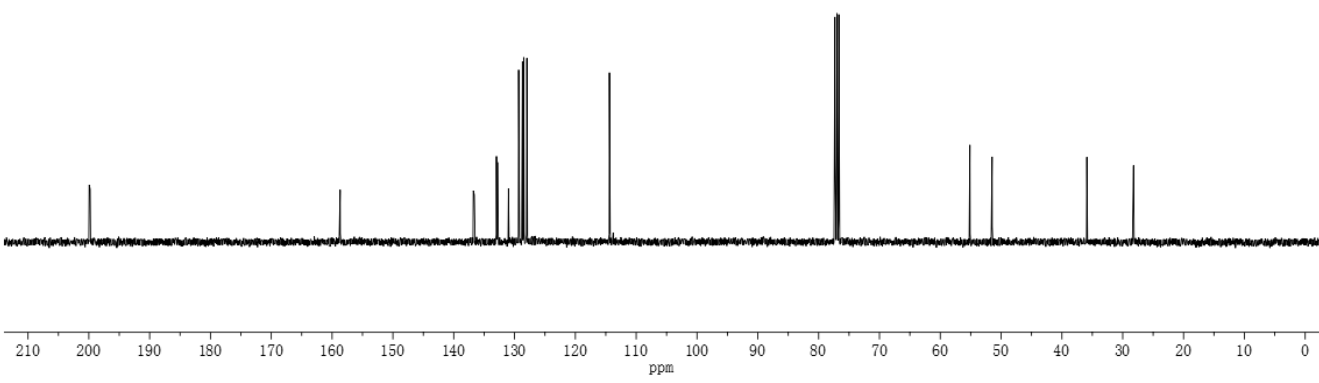

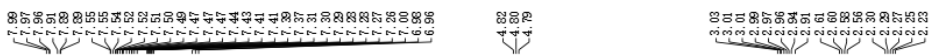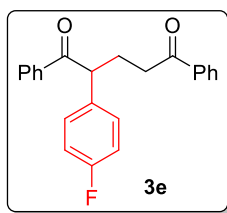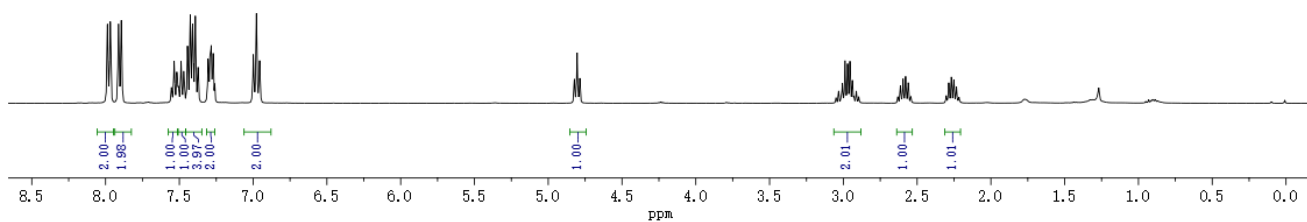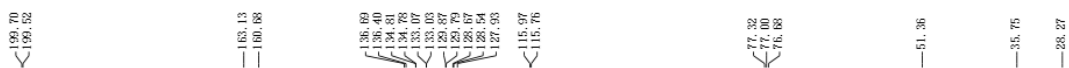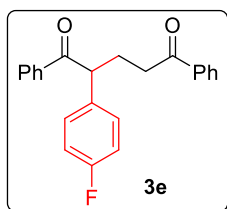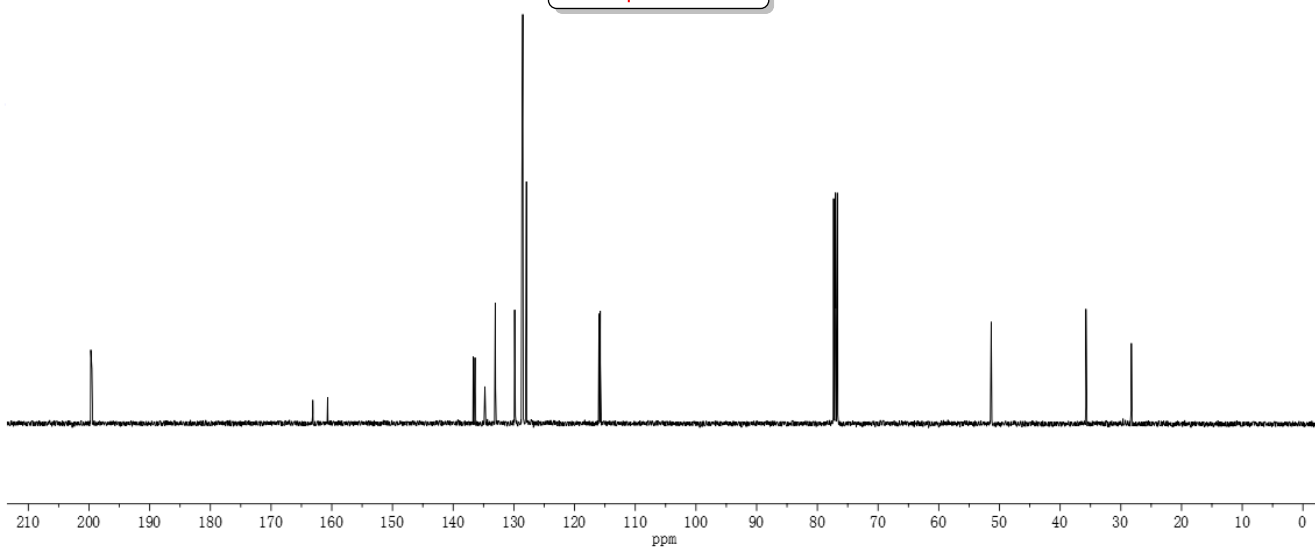



7.86  
7.81  
7.79  
7.53  
7.51  
7.49  
7.47  
7.44  
7.41  
7.40  
7.39  
7.37  
7.35  
7.31  
7.19

4.81  
4.79  
4.77

3.00  
2.99  
2.98  
2.97  
2.96  
2.95  
2.94  
2.93  
2.92  
2.91

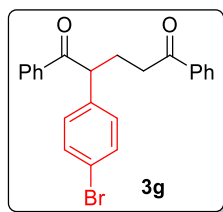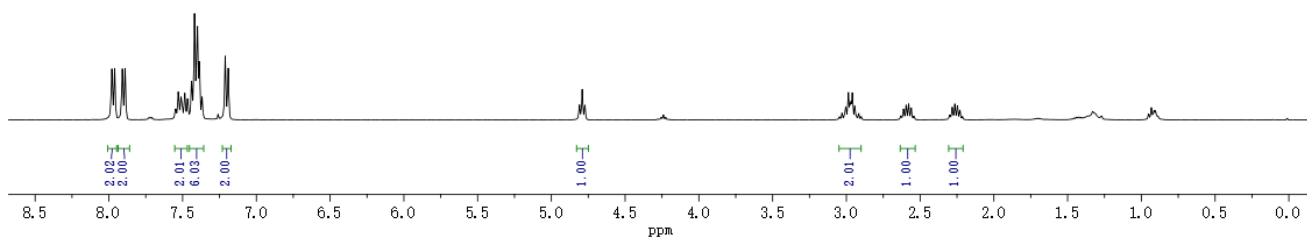

199.54  
199.13

138.17  
136.60  
136.25  
133.85  
132.85  
129.97  
128.63  
128.55  
127.89  
121.18

77.32  
77.00  
76.88  
51.52  
35.66  
28.03

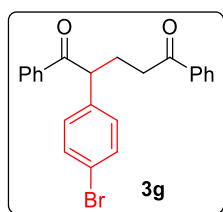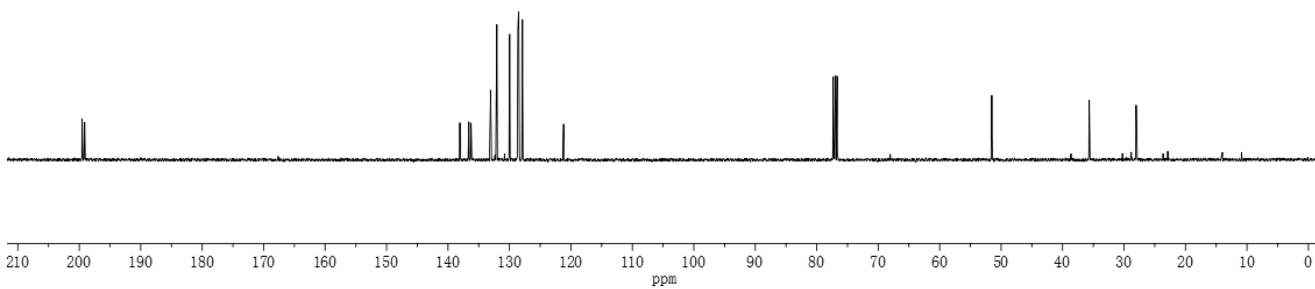

7.94  
7.92  
7.90  
7.88  
7.86  
7.84  
7.82  
7.80  
7.78  
7.76  
7.74  
7.72  
7.70  
7.68  
7.66  
7.64  
7.62

5.06  
5.04  
5.02

3.10  
3.08  
3.07  
3.05  
3.03  
3.01  
2.99  
2.97  
2.95  
2.93  
2.91  
2.89  
2.87  
2.85  
2.83  
2.81  
2.79  
2.77  
2.75  
2.73  
2.71  
2.69  
2.67  
2.65  
2.63  
2.61  
2.59  
2.57  
2.55  
2.53  
2.51  
2.49  
2.47  
2.45  
2.43  
2.41  
2.39  
2.37  
2.35  
2.33  
2.31  
2.29  
2.27  
2.25  
2.23  
2.21  
2.19  
2.17  
2.15  
2.13  
2.11  
2.09  
2.07  
2.05  
2.03  
2.01  
1.99  
1.97  
1.95  
1.93  
1.91  
1.89  
1.87  
1.85  
1.83  
1.81  
1.79  
1.77  
1.75  
1.73  
1.71  
1.69  
1.67  
1.65  
1.63  
1.61  
1.59  
1.57  
1.55  
1.53  
1.51  
1.49  
1.47  
1.45  
1.43  
1.41  
1.39  
1.37  
1.35  
1.33  
1.31  
1.29  
1.27  
1.25  
1.23  
1.21  
1.19  
1.17  
1.15  
1.13  
1.11  
1.09  
1.07  
1.05  
1.03  
1.01  
0.99  
0.97  
0.95  
0.93  
0.91  
0.89  
0.87  
0.85  
0.83  
0.81  
0.79  
0.77  
0.75  
0.73  
0.71  
0.69  
0.67  
0.65  
0.63  
0.61  
0.59  
0.57  
0.55  
0.53  
0.51  
0.49  
0.47  
0.45  
0.43  
0.41  
0.39  
0.37  
0.35  
0.33  
0.31  
0.29  
0.27  
0.25  
0.23  
0.21  
0.19  
0.17  
0.15  
0.13  
0.11  
0.09  
0.07  
0.05  
0.03  
0.01

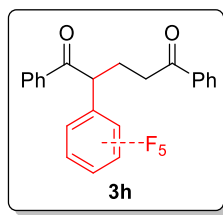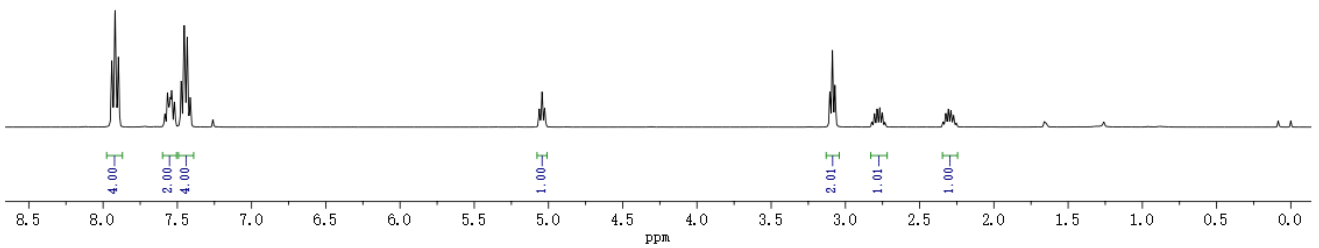

196.86  
196.05

136.53  
135.61  
133.42  
133.29  
128.82  
128.64  
127.91

113.21

77.32  
77.00  
76.68

42.63  
35.65

24.40

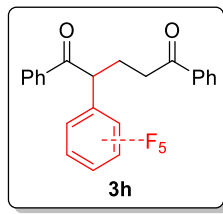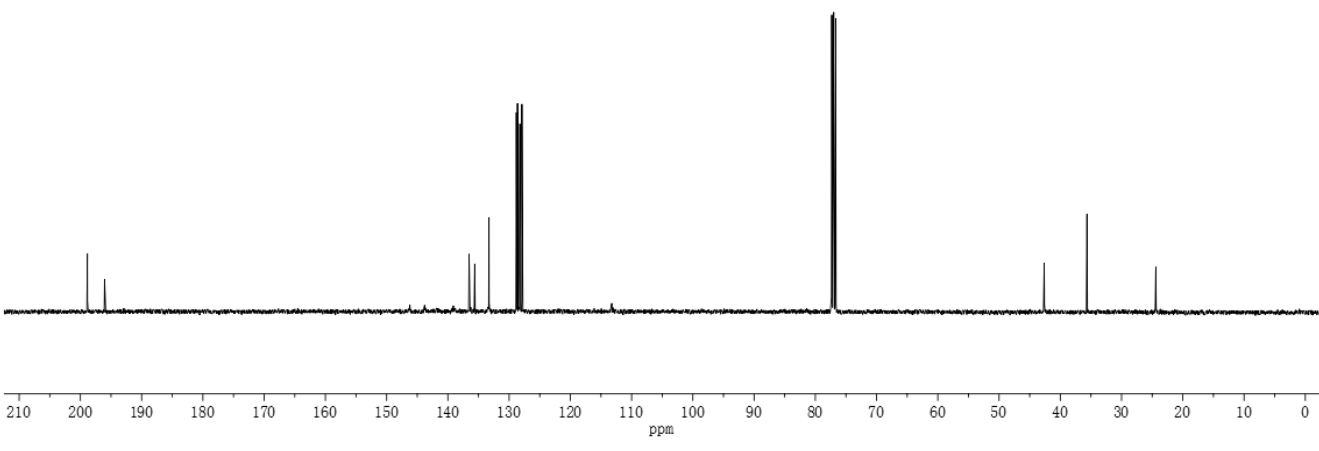







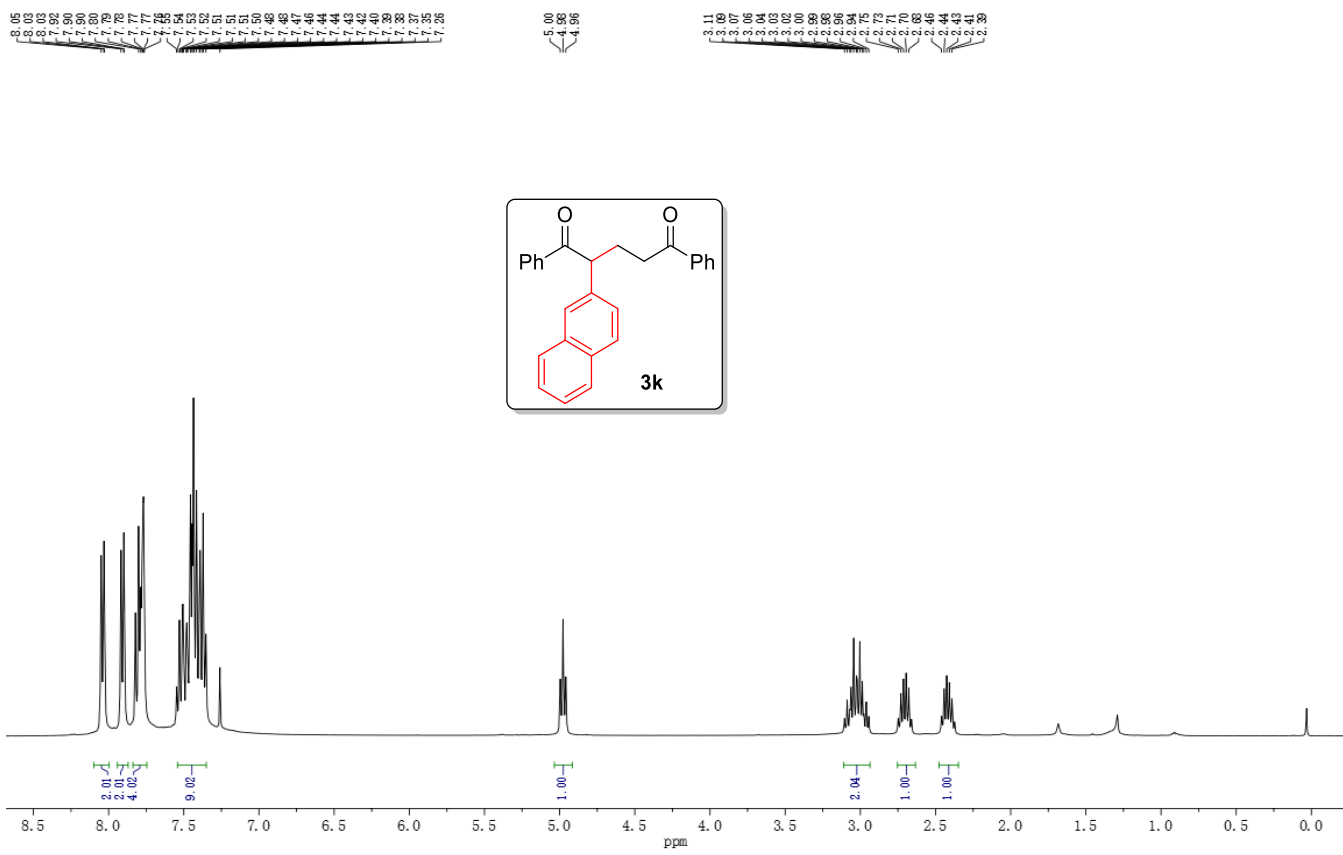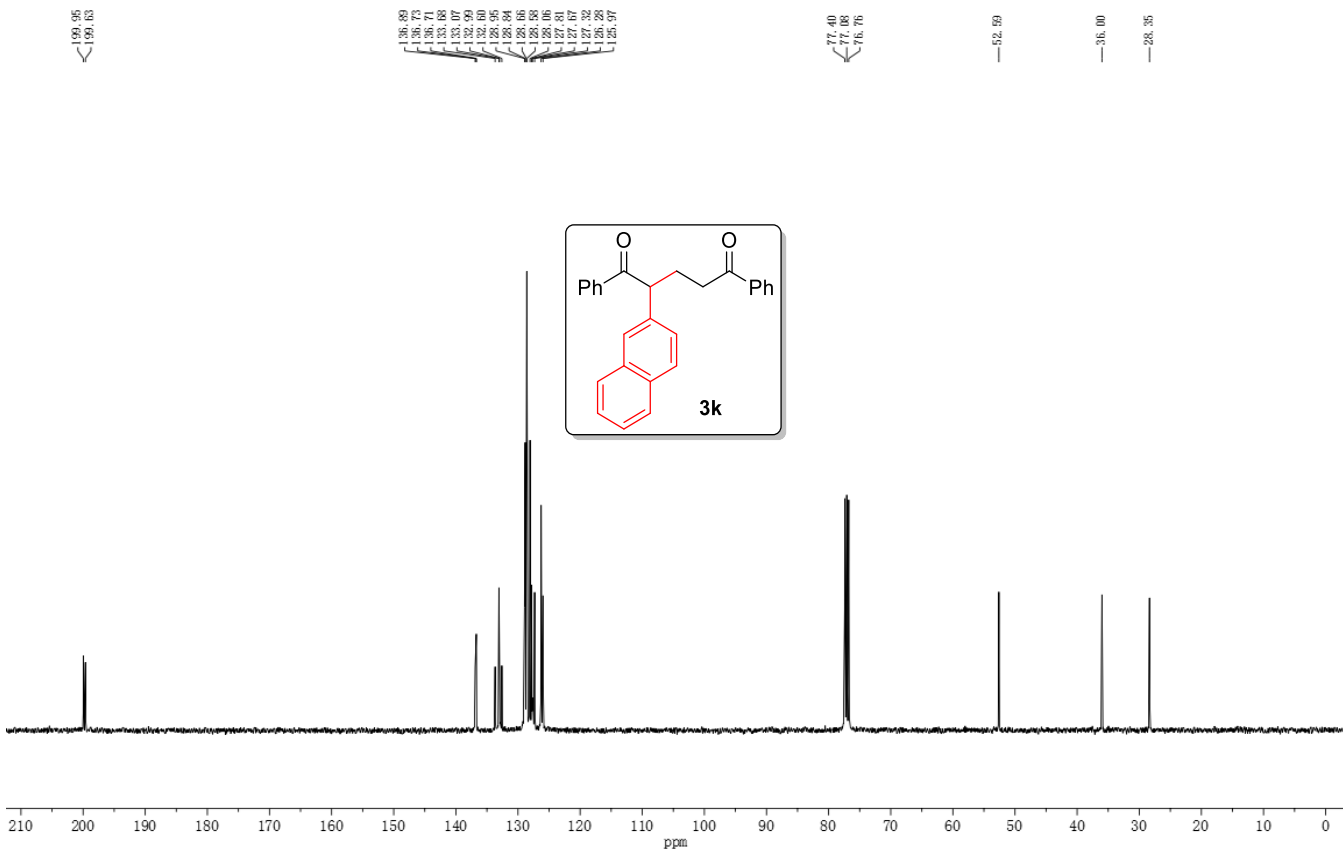

7.83  
7.81  
7.60  
7.52  
7.51  
7.50  
7.41  
7.40  
7.38  
7.36  
7.35  
7.34  
7.33  
7.32  
7.31

8.88  
8.85  
8.84  
8.82  
8.81  
8.50  
8.49  
8.48

-1.67

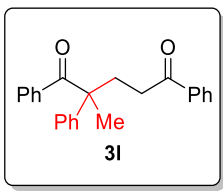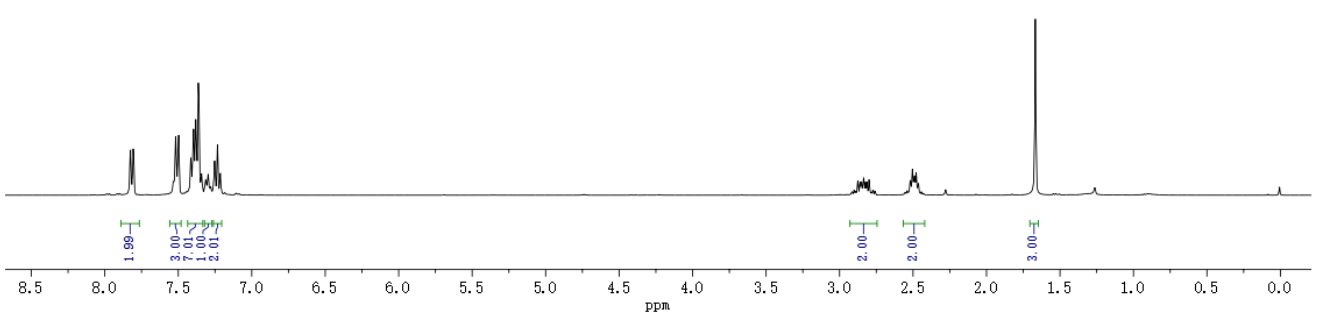

203.06  
199.90

143.37  
136.28  
132.92  
131.88  
129.59  
128.68  
128.06  
128.04  
127.11  
126.22

77.32  
77.00  
76.88

54.15

34.74  
34.08

24.33

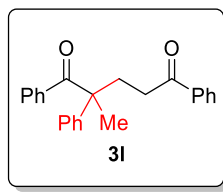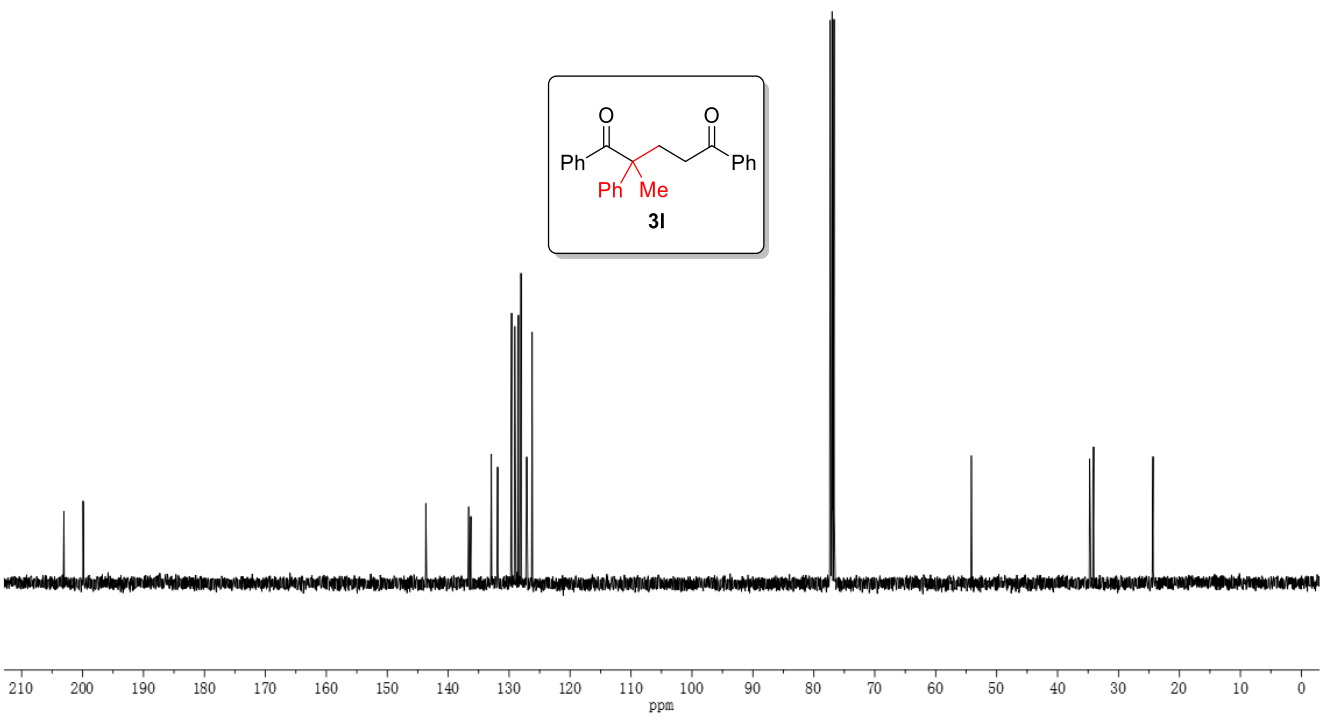

7.82  
7.82  
7.82  
7.80  
7.80  
7.53  
7.53  
7.51  
7.51  
7.49  
7.41  
7.41  
7.39  
7.39  
7.38  
7.38  
7.37  
7.37  
7.26  
7.26  
7.25  
7.25  
7.24  
7.24  
7.22

2.88  
2.88  
2.86  
2.86  
2.81  
2.81  
2.80  
2.80  
2.79  
2.49  
2.47  
2.46  
2.45  
2.45

1.64

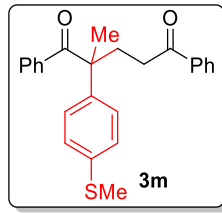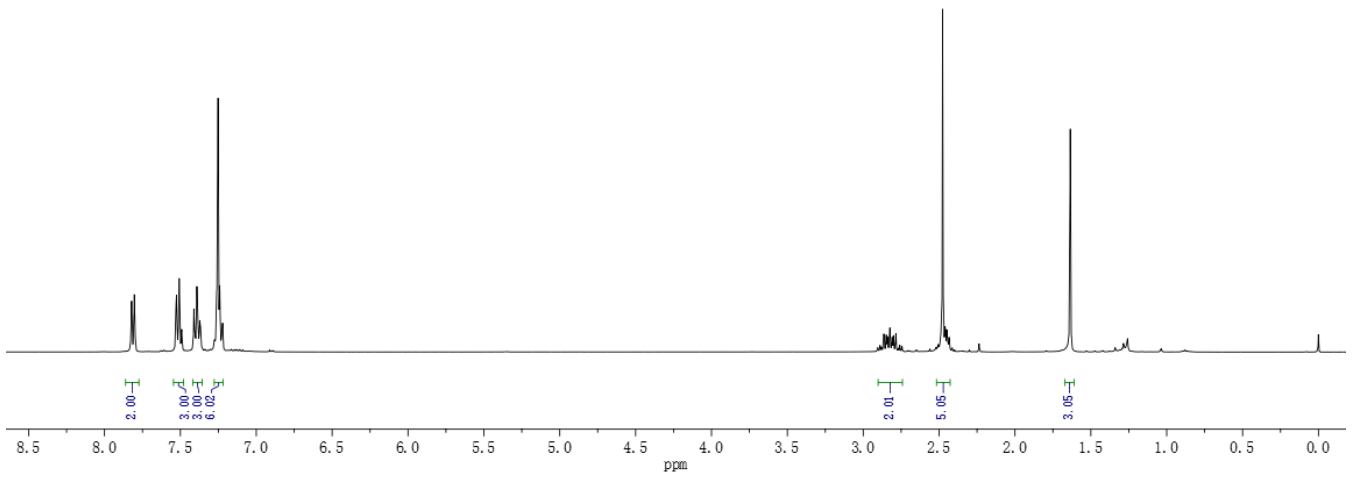

203.00  
199.86

140.43  
137.45  
136.72  
136.32  
132.59  
131.88  
129.94  
128.17  
128.09  
126.86  
126.78

77.39  
77.28  
77.07  
76.76

53.82

34.75  
34.11

24.37

15.61

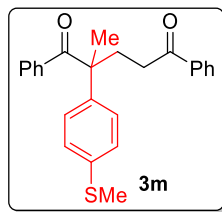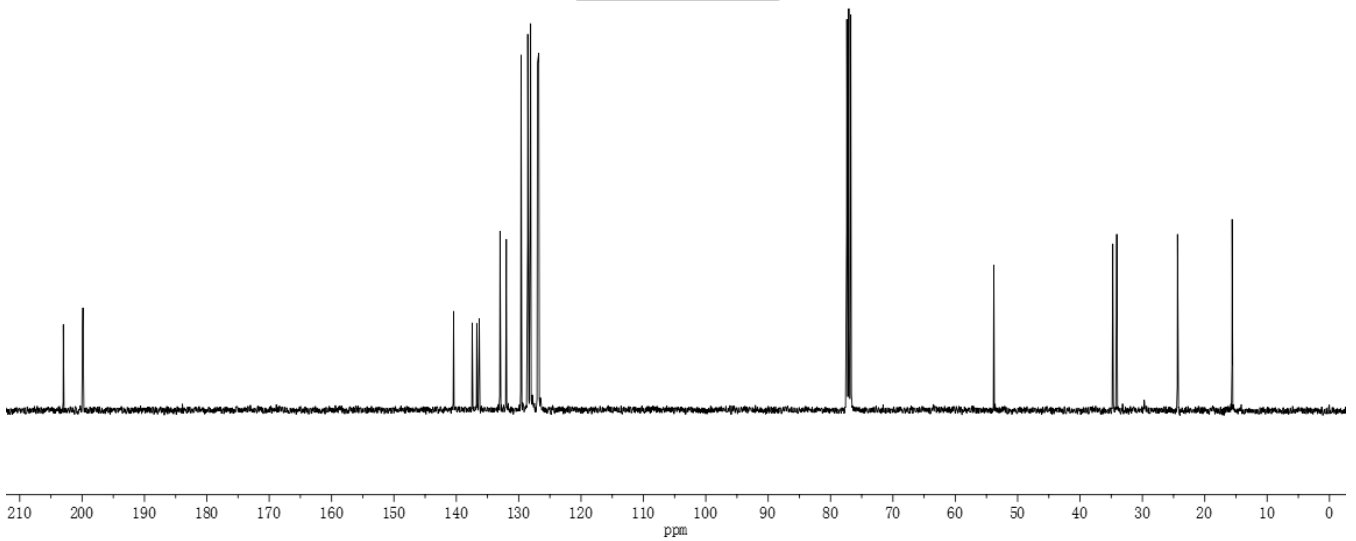

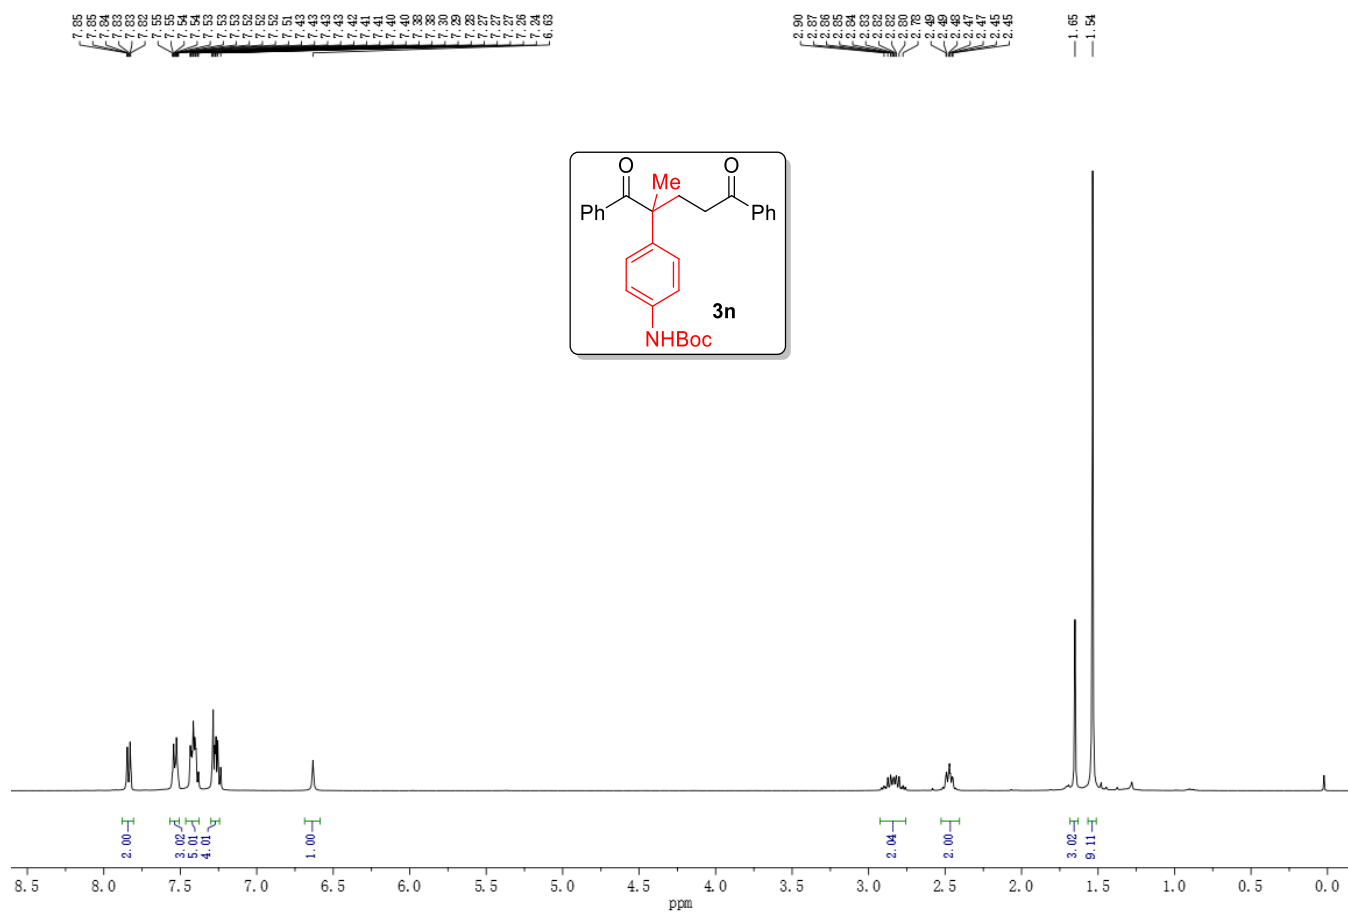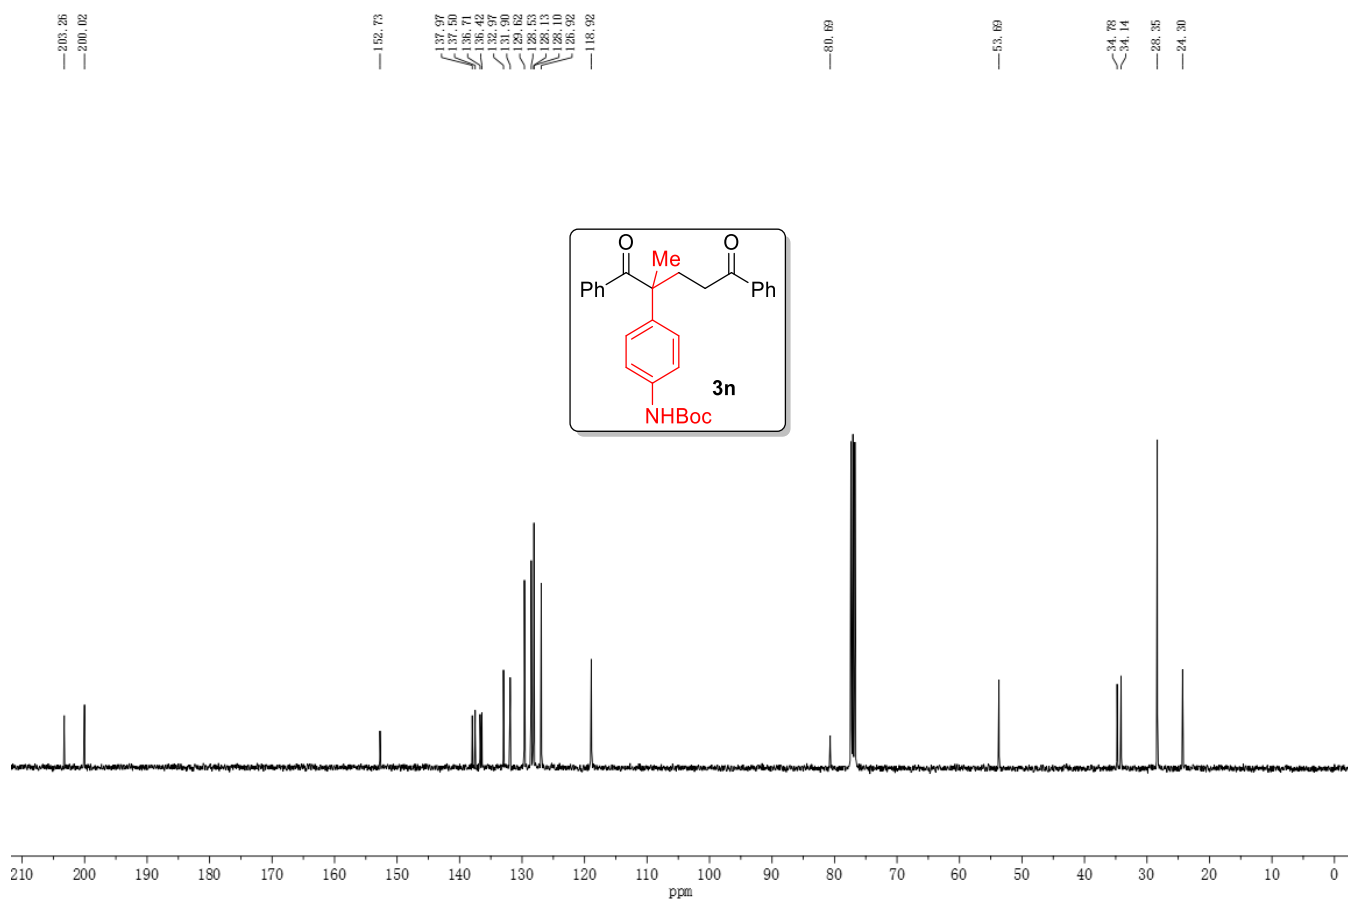



7.81, 7.80, 7.79, 7.68, 7.60, 7.58, 7.58, 7.52, 7.42, 7.41, 7.40, 7.39, 7.38, 7.37, 7.36, 7.35, 7.35, 7.35, 7.29, 7.27, 7.25, 3.16, 3.15, 3.14, 3.12, 3.11, 3.06, 2.65, 2.63, 2.62, 2.61, 2.59, 2.58, 2.52, 2.50, 2.49, 2.49, 2.46, 2.46, 2.24, 2.24, 2.21, 2.20, 2.19, 2.16, 1.72, 1.71, 1.70, 1.69, 1.69, 1.67, 0.75, 0.74, 0.74, 0.73, 0.72, 0.72, 0.71, 0.71, 0.45, 0.45, 0.44, 0.43, 0.41, 0.41, 0.39, 0.38, 0.38, 0.37, 0.36, 0.36, 0.35, 0.07, 0.07, 0.06, 0.06, 0.05, 0.05, 0.04, 0.04, 0.03, 0.03

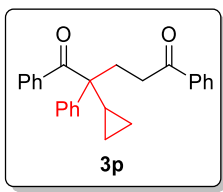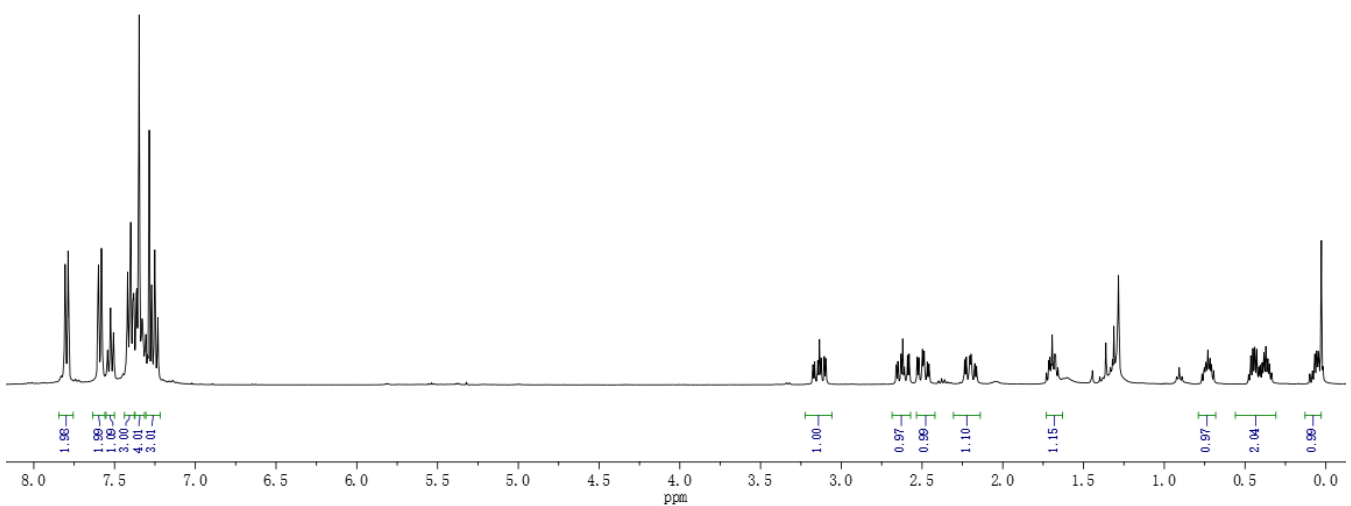

201.79  
199.94

141.29, 136.56, 135.56, 132.92, 131.96, 130.02, 128.90, 128.17, 128.05, 128.02, 127.25

77.35, 76.71

57.33

34.17, 30.85

18.03

3.87, 0.15

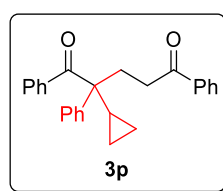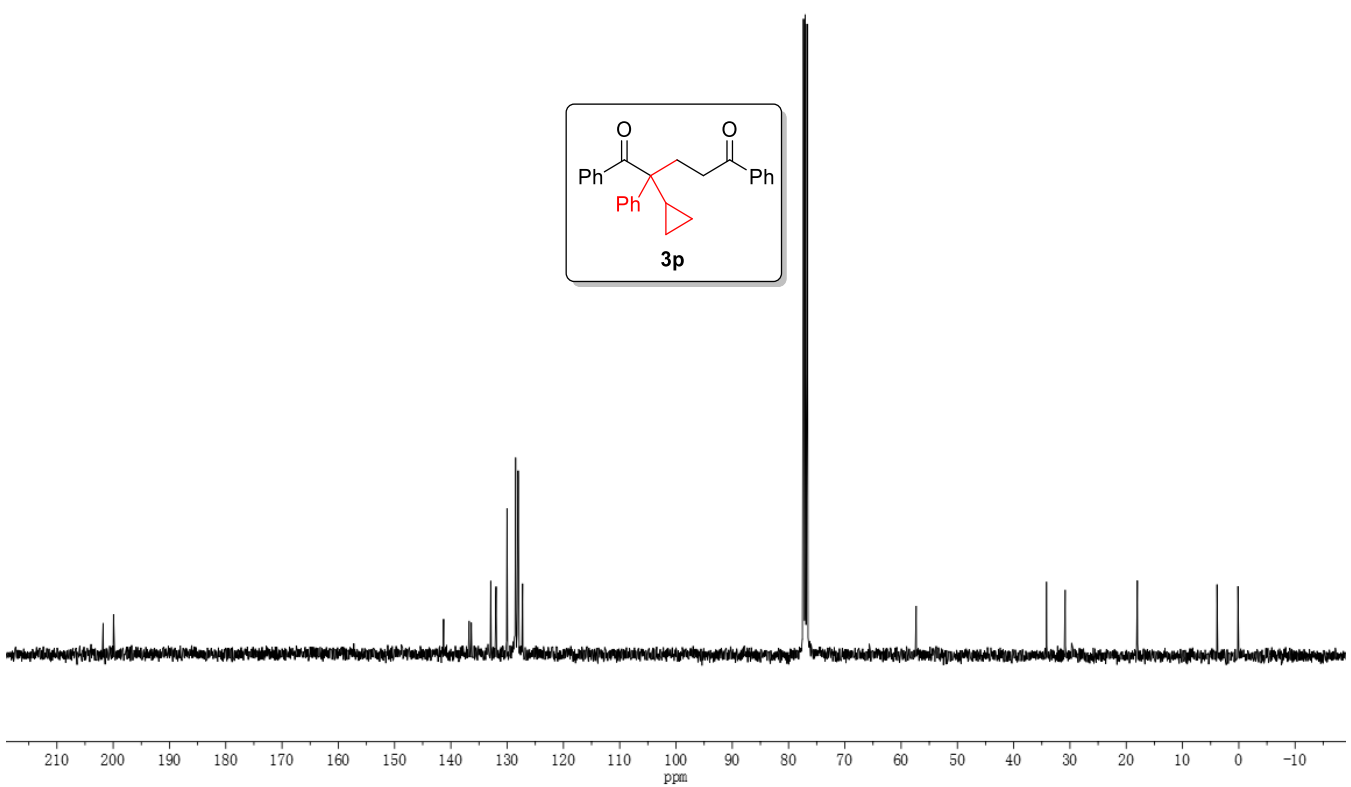





8.03  
8.02  
8.01  
8.00  
7.99  
7.98  
7.76  
7.65  
7.55  
7.51  
7.49  
7.47  
7.45  
7.44  
7.40  
7.38  
7.37  
7.36  
7.35  
7.33  
7.31  
7.30  
7.28  
7.25  
7.23  
7.21  
7.20

4.66  
4.60

3.23  
3.22  
3.21  
3.20  
3.19  
3.18  
3.17  
3.16  
3.15  
3.14  
3.13  
3.12  
3.11  
3.10  
3.09  
3.08  
3.07  
3.06  
3.05  
3.04  
3.03  
3.02  
3.01  
3.00  
2.99  
2.98  
2.97  
2.96  
2.95  
2.94  
2.93  
2.92  
2.91  
2.90  
2.89  
2.88  
2.87  
2.86  
2.85  
2.84  
2.83  
2.82  
2.81  
2.80  
2.79  
2.78  
2.77  
2.76  
2.75  
2.74  
2.73  
2.72  
2.71  
2.70  
2.69  
2.68  
2.67  
2.66  
2.65  
2.64  
2.63  
2.62  
2.61  
2.60  
2.59  
2.58  
2.57  
2.56  
2.55  
2.54

1.09  
1.08  
0.84  
0.82

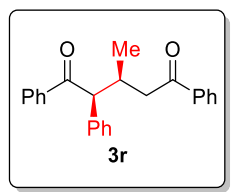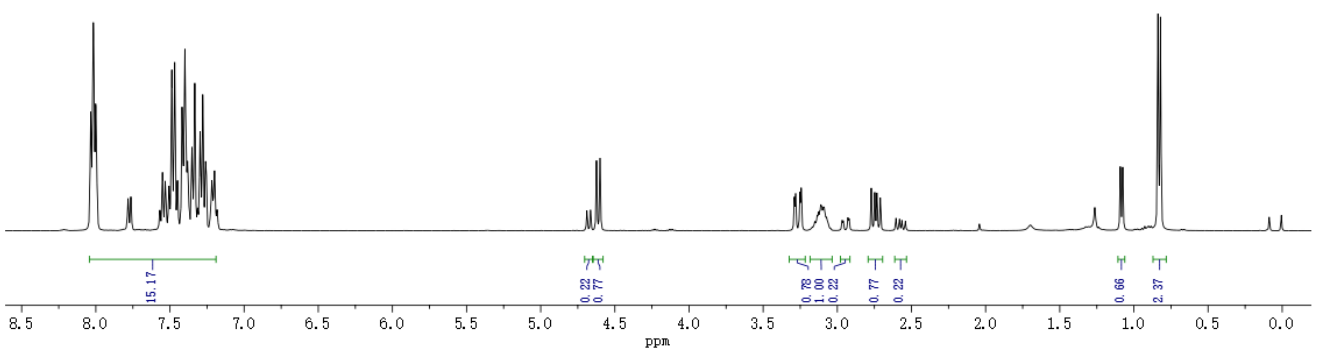

199.97  
199.81

137.62  
137.55  
137.34  
137.12  
137.07  
136.94  
136.76  
136.62  
136.59  
128.96  
128.82  
128.62  
128.55  
128.42  
128.32  
128.32  
127.44  
127.26

77.32  
77.10  
76.88

59.05  
58.74

44.24  
42.75

33.86  
33.54

18.77  
17.39

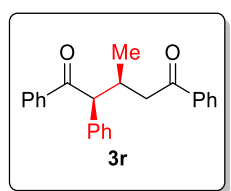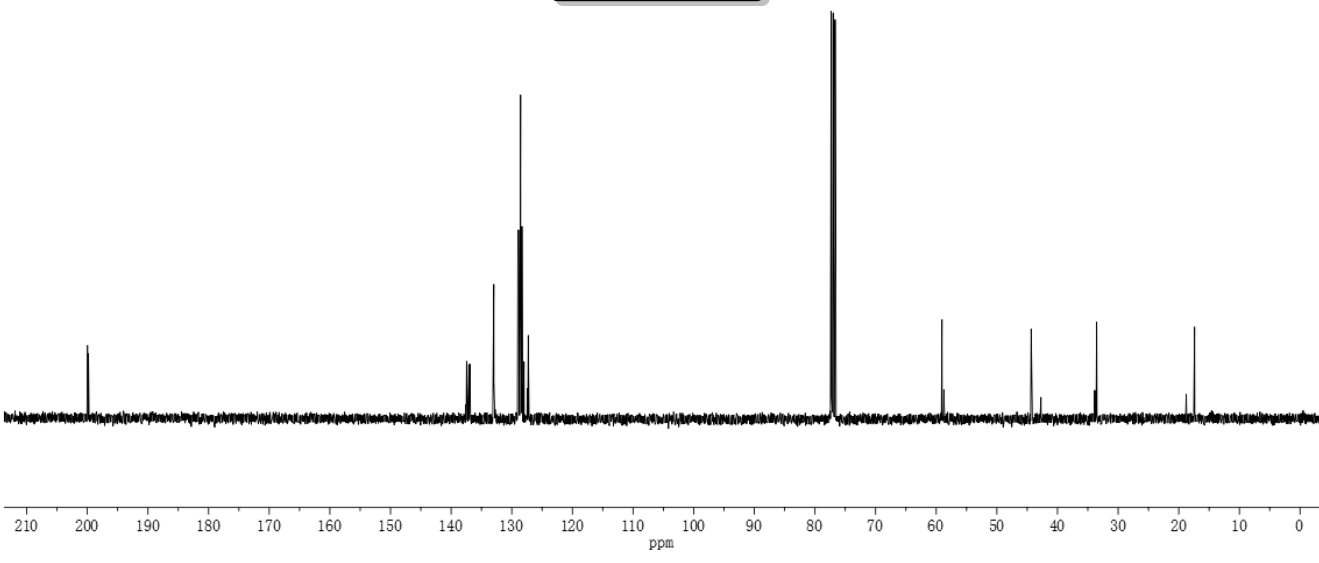



8.06  
8.04  
8.03  
8.02  
7.99  
7.56  
7.54  
7.52  
7.50  
7.49  
7.47  
7.45  
7.43  
7.41  
7.38  
7.37  
7.36  
7.35  
7.33  
7.29  
7.28  
7.25

-5.40

3.28  
3.24  
3.01  
2.97

0.70  
0.69  
0.68  
0.66  
0.65  
0.63  
0.62  
0.61  
0.60  
0.59  
0.43  
0.42  
0.41  
0.40

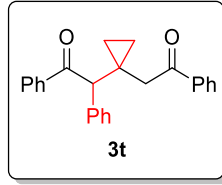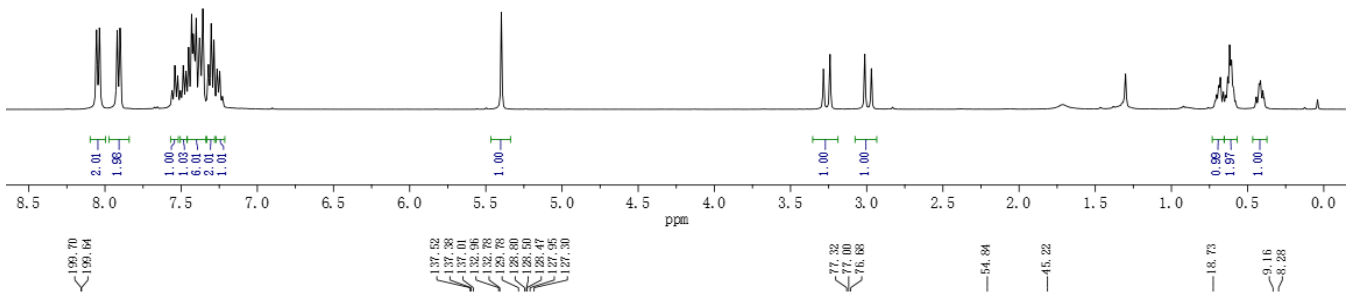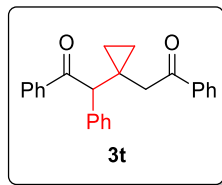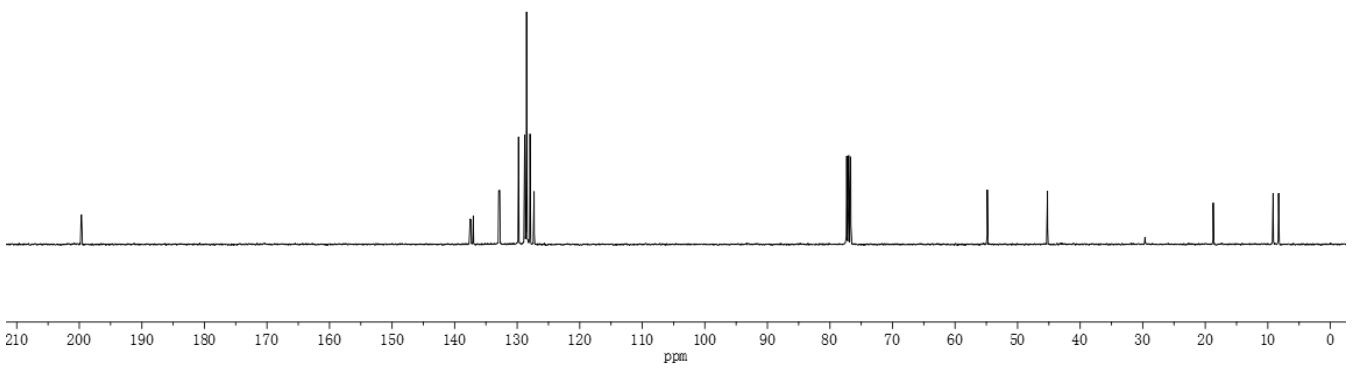

7.84  
7.83  
7.82  
7.81  
7.64  
7.63  
7.62  
7.61  
7.59  
7.57  
7.56  
7.55  
7.49  
7.41  
7.40  
7.39  
7.37  
7.36  
7.35  
7.34  
7.33  
7.23  
7.22  
6.74

3.08  
3.06  
3.04  
3.02  
3.01  
3.00  
3.00  
3.00  
2.88  
2.87  
2.86  
2.84  
2.83  
2.70  
2.69  
2.67  
2.66  
2.65  
2.64  
2.62  
2.60  
1.75

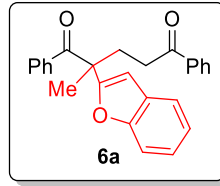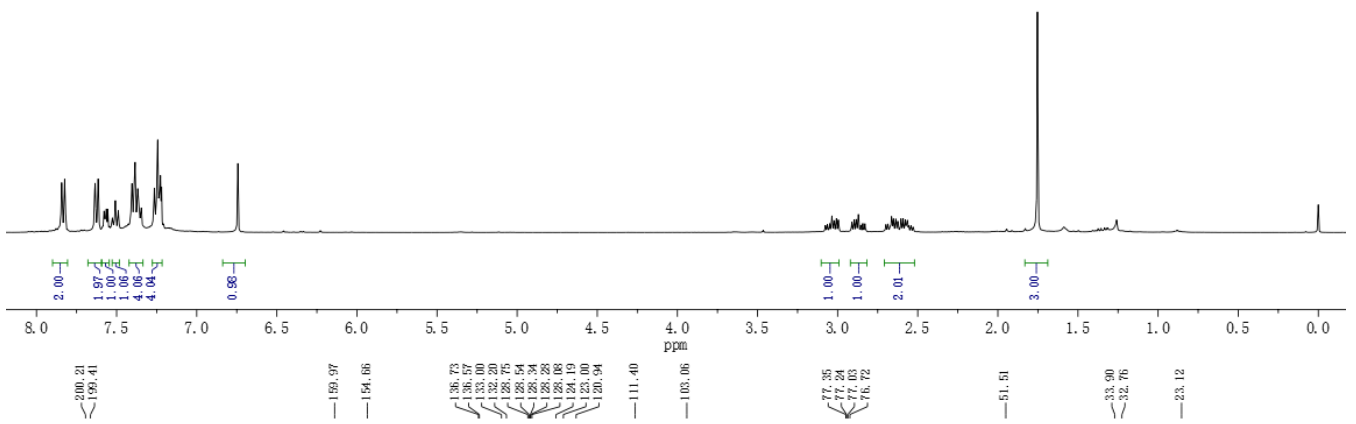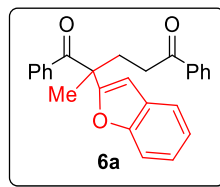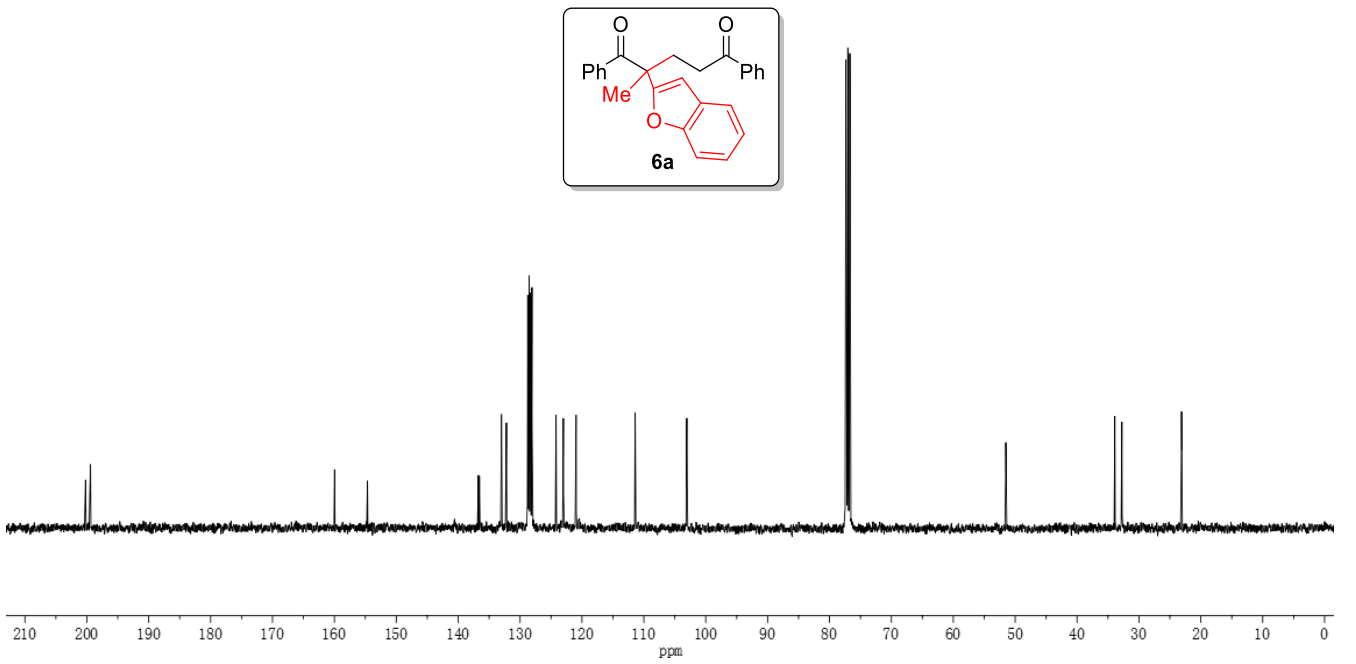

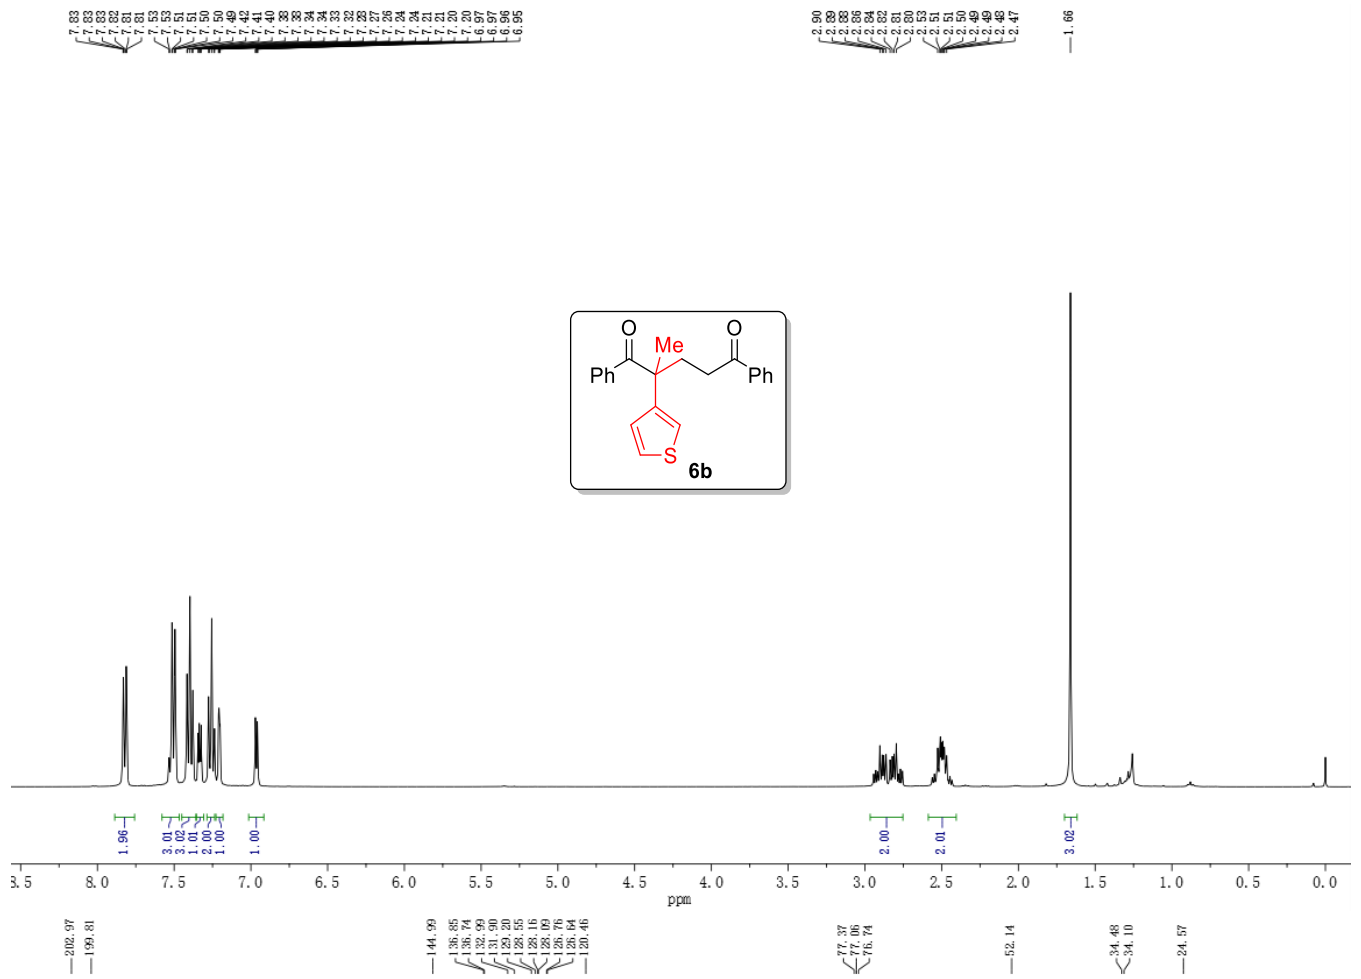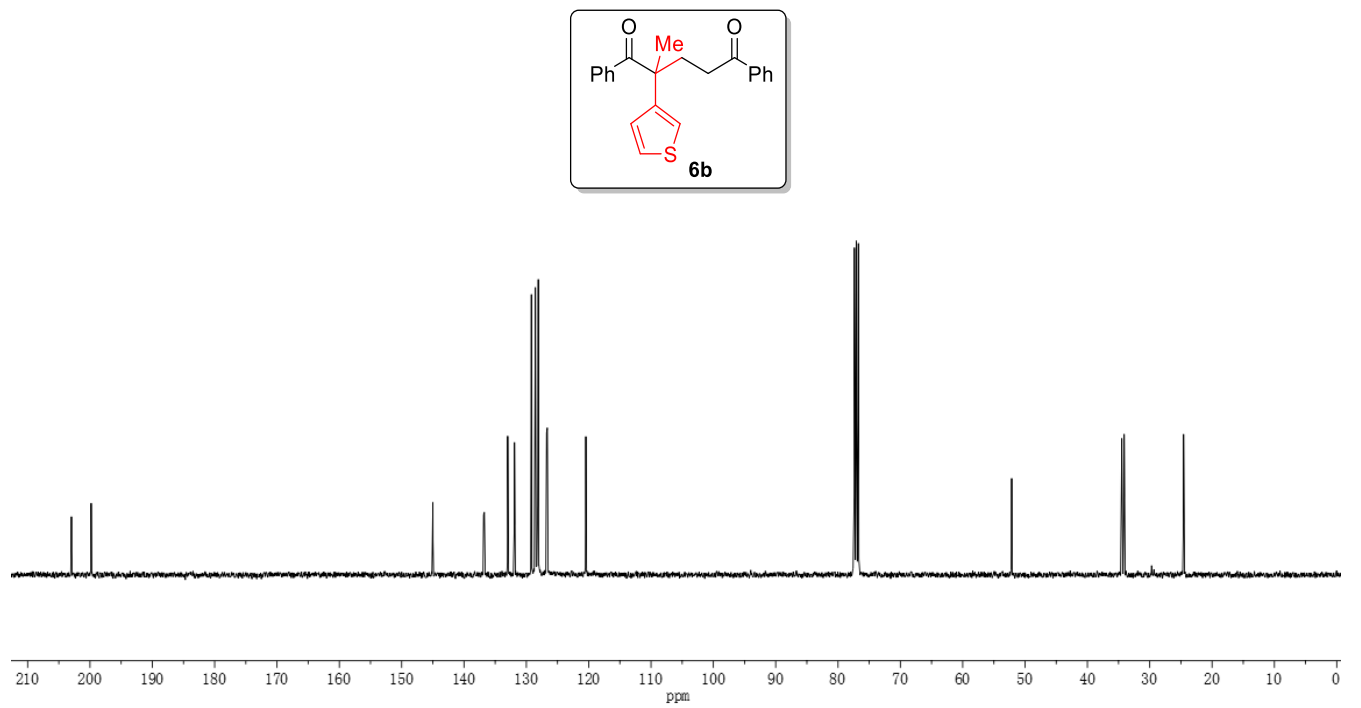

7.58  
7.57  
7.56  
7.55  
7.54  
7.53  
7.52  
7.51  
7.50  
7.49  
7.48  
7.47  
7.46  
7.45  
7.44  
7.43  
7.42  
7.41

3.83  
3.82  
3.81  
3.80  
3.79  
3.78  
3.77  
3.76  
3.75  
3.74  
3.73  
3.72  
3.71  
3.70  
3.69  
3.68  
3.67  
3.66  
3.65  
3.64  
3.63  
3.62  
3.61  
3.60  
3.59  
3.58  
3.57  
3.56  
3.55  
3.54  
3.53  
3.52  
3.51  
3.50  
3.49  
3.48  
3.47  
3.46  
3.45  
3.44  
3.43  
3.42  
3.41  
3.40  
3.39  
3.38  
3.37  
3.36  
3.35  
3.34  
3.33  
3.32  
3.31  
3.30  
3.29  
3.28  
3.27  
3.26  
3.25  
3.24  
3.23  
3.22  
3.21  
3.20  
3.19  
3.18  
3.17  
3.16  
3.15  
3.14  
3.13  
3.12  
3.11  
3.10  
3.09  
3.08  
3.07  
3.06  
3.05  
3.04  
3.03  
3.02  
3.01  
3.00  
2.99  
2.98  
2.97  
2.96  
2.95  
2.94  
2.93  
2.92  
2.91  
2.90  
2.89  
2.88  
2.87  
2.86  
2.85  
2.84  
2.83  
2.82  
2.81  
2.80  
2.79  
2.78  
2.77  
2.76  
2.75  
2.74  
2.73  
2.72  
2.71  
2.70  
2.69  
2.68  
2.67  
2.66  
2.65  
2.64  
2.63  
2.62  
2.61  
2.60  
2.59  
2.58  
2.57  
2.56  
2.55  
2.54  
2.53  
2.52  
2.51  
2.50  
2.49  
2.48  
2.47  
2.46  
2.45  
2.44  
2.43  
2.42  
2.41  
2.40  
2.39  
2.38  
2.37  
2.36  
2.35  
2.34  
2.33  
2.32  
2.31  
2.30  
2.29  
2.28  
2.27  
2.26  
2.25  
2.24  
2.23  
2.22  
2.21  
2.20  
2.19  
2.18  
2.17  
2.16  
2.15  
2.14  
2.13  
2.12  
2.11  
2.10  
2.09  
2.08  
2.07  
2.06  
2.05  
2.04  
2.03  
2.02  
2.01  
2.00  
1.99  
1.98  
1.97  
1.96  
1.95  
1.94  
1.93  
1.92  
1.91  
1.90  
1.89  
1.88  
1.87  
1.86  
1.85  
1.84  
1.83  
1.82  
1.81  
1.80  
1.79  
1.78  
1.77  
1.76  
1.75  
1.74  
1.73  
1.72  
1.71  
1.70  
1.69  
1.68  
1.67  
1.66  
1.65  
1.64  
1.63  
1.62  
1.61  
1.60  
1.59  
1.58  
1.57  
1.56  
1.55  
1.54  
1.53  
1.52  
1.51  
1.50  
1.49  
1.48  
1.47  
1.46  
1.45  
1.44  
1.43  
1.42  
1.41  
1.40  
1.39  
1.38  
1.37  
1.36  
1.35  
1.34  
1.33  
1.32  
1.31  
1.30  
1.29  
1.28  
1.27  
1.26  
1.25  
1.24  
1.23  
1.22  
1.21  
1.20  
1.19  
1.18  
1.17  
1.16  
1.15  
1.14  
1.13  
1.12  
1.11  
1.10  
1.09  
1.08  
1.07  
1.06  
1.05  
1.04  
1.03  
1.02  
1.01  
1.00  
0.99  
0.98  
0.97  
0.96  
0.95  
0.94  
0.93  
0.92  
0.91  
0.90  
0.89  
0.88  
0.87  
0.86  
0.85  
0.84  
0.83  
0.82  
0.81  
0.80  
0.79  
0.78  
0.77  
0.76  
0.75  
0.74  
0.73  
0.72  
0.71  
0.70  
0.69  
0.68  
0.67  
0.66  
0.65  
0.64  
0.63  
0.62  
0.61  
0.60  
0.59  
0.58  
0.57  
0.56  
0.55  
0.54  
0.53  
0.52  
0.51  
0.50  
0.49  
0.48  
0.47  
0.46  
0.45  
0.44  
0.43  
0.42  
0.41  
0.40  
0.39  
0.38  
0.37  
0.36  
0.35  
0.34  
0.33  
0.32  
0.31  
0.30  
0.29  
0.28  
0.27  
0.26  
0.25  
0.24  
0.23  
0.22  
0.21  
0.20  
0.19  
0.18  
0.17  
0.16  
0.15  
0.14  
0.13  
0.12  
0.11  
0.10  
0.09  
0.08  
0.07  
0.06  
0.05  
0.04  
0.03  
0.02  
0.01  
0.00

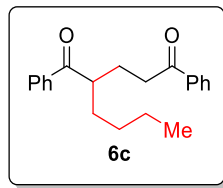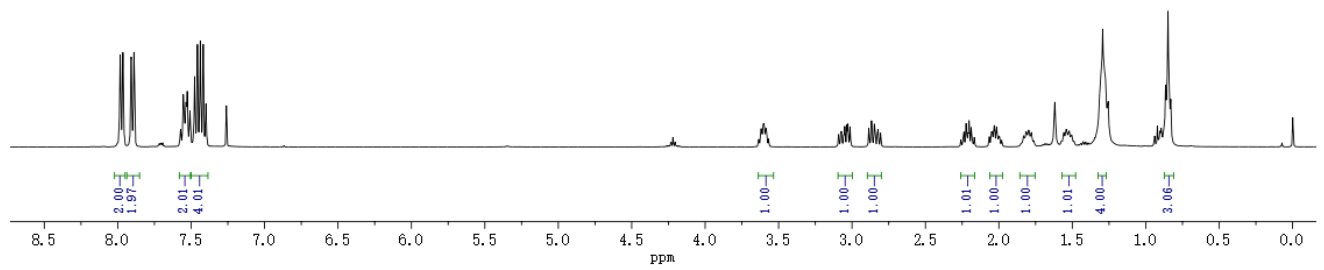

204.04  
191.52  
137.95  
136.72  
133.02  
132.99  
128.89  
128.53  
128.01  
77.32  
77.00  
76.88  
45.12  
35.01  
32.27  
29.51  
26.09  
22.81  
13.87

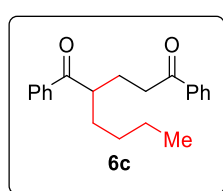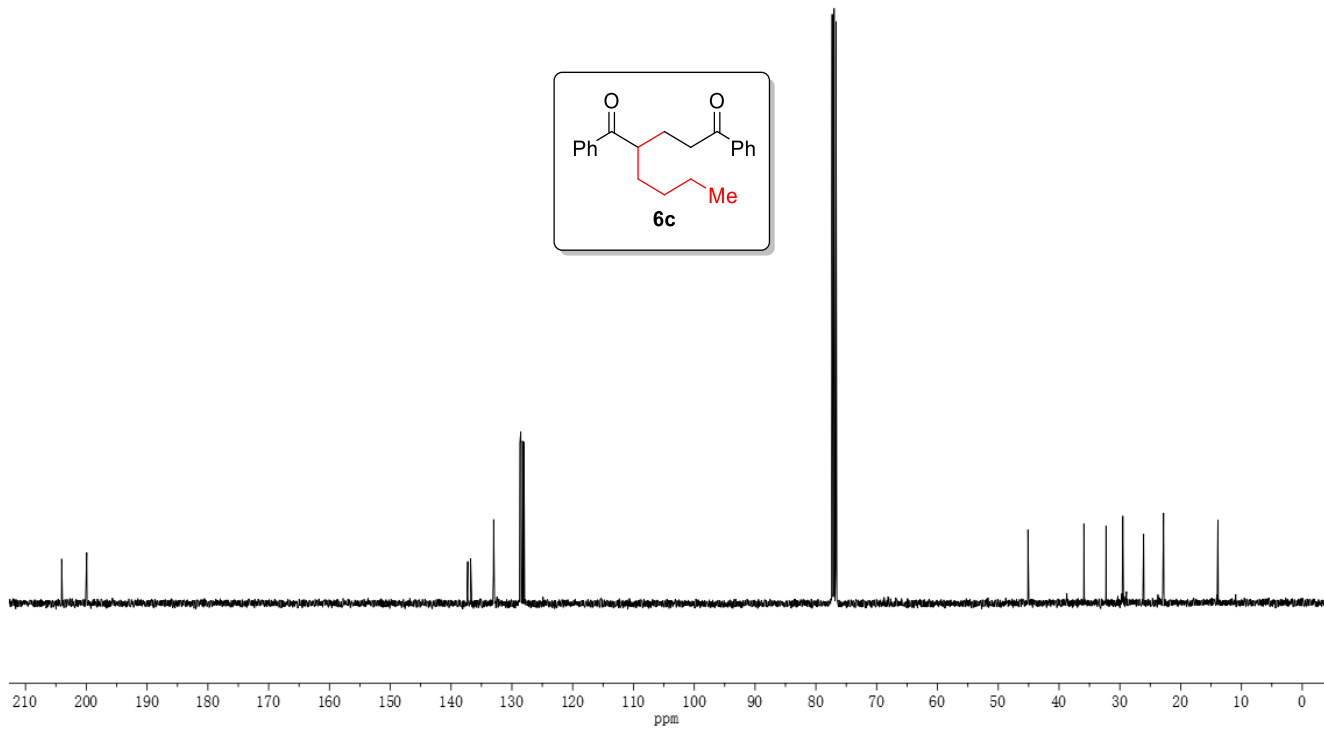

7.95, 7.96, 7.91, 7.89, 7.55, 7.53, 7.49, 7.44, 7.42, 7.40, 7.39

3.68, 3.69, 3.68, 3.05, 3.03, 3.02, 3.01, 2.99, 2.98, 2.97, 2.96, 2.95, 2.94, 2.93, 2.92, 2.91, 2.90, 2.89, 2.88, 2.87, 2.86, 2.85, 2.84, 2.83, 2.82, 2.81, 2.80, 2.79, 2.78, 2.77, 2.76, 2.75, 2.74, 2.73, 2.72, 2.71, 2.70, 2.69, 2.68, 2.67, 2.66, 2.65, 2.64, 2.63, 2.62, 2.61, 2.60, 2.59, 2.58, 2.57, 2.56, 2.55, 2.54, 2.53, 2.52, 2.51, 2.50, 2.49, 2.48, 2.47, 2.46, 2.45, 2.44, 2.43, 2.42, 2.41, 2.40, 2.39, 2.38, 2.37, 2.36, 2.35, 2.34, 2.33, 2.32, 2.31, 2.30, 2.29, 2.28, 2.27, 2.26, 2.25, 2.24, 2.23, 2.22, 2.21, 2.20, 2.19, 2.18, 2.17, 2.16, 2.15, 2.14, 2.13, 2.12, 2.11, 2.10, 2.09, 2.08, 2.07, 2.06, 2.05, 2.04, 2.03, 2.02, 2.01, 2.00, 1.99, 1.98, 1.97, 1.96, 1.95, 1.94, 1.93, 1.92, 1.91, 1.90, 1.89, 1.88, 1.87, 1.86, 1.85, 1.84, 1.83, 1.82, 1.81, 1.80, 1.79, 1.78, 1.77, 1.76, 1.75, 1.74, 1.73, 1.72, 1.71, 1.70, 1.69, 1.68, 1.67, 1.66, 1.65, 1.64, 1.63, 1.62, 1.61, 1.60, 1.59, 1.58, 1.57, 1.56, 1.55, 1.54, 1.53, 1.52, 1.51, 1.50, 1.49, 1.48, 1.47, 1.46, 1.45, 1.44, 1.43, 1.42, 1.41, 1.40, 1.39, 1.38, 1.37, 1.36, 1.35, 1.34, 1.33, 1.32, 1.31, 1.30, 1.29, 1.28, 1.27, 1.26, 1.25, 1.24, 1.23, 1.22, 1.21, 1.20, 1.19, 1.18, 1.17, 1.16, 1.15, 1.14, 1.13, 1.12, 1.11, 1.10, 1.09, 1.08, 1.07, 1.06, 1.05, 1.04, 1.03, 1.02, 1.01, 1.00, 0.99, 0.98, 0.97, 0.96, 0.95, 0.94, 0.93, 0.92, 0.91, 0.90, 0.89, 0.88, 0.87, 0.86, 0.85, 0.84, 0.83, 0.82, 0.81, 0.80, 0.79, 0.78, 0.77, 0.76, 0.75, 0.74, 0.73, 0.72, 0.71, 0.70, 0.69, 0.68, 0.67, 0.66, 0.65, 0.64, 0.63, 0.62, 0.61, 0.60, 0.59, 0.58, 0.57, 0.56, 0.55, 0.54, 0.53, 0.52, 0.51, 0.50, 0.49, 0.48, 0.47, 0.46, 0.45, 0.44, 0.43, 0.42, 0.41, 0.40, 0.39, 0.38, 0.37, 0.36, 0.35, 0.34, 0.33, 0.32, 0.31, 0.30, 0.29, 0.28, 0.27, 0.26, 0.25, 0.24, 0.23, 0.22, 0.21, 0.20, 0.19, 0.18, 0.17, 0.16, 0.15, 0.14, 0.13, 0.12, 0.11, 0.10, 0.09, 0.08, 0.07, 0.06, 0.05, 0.04, 0.03, 0.02, 0.01, 0.00

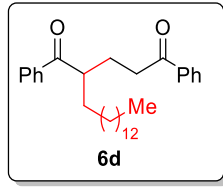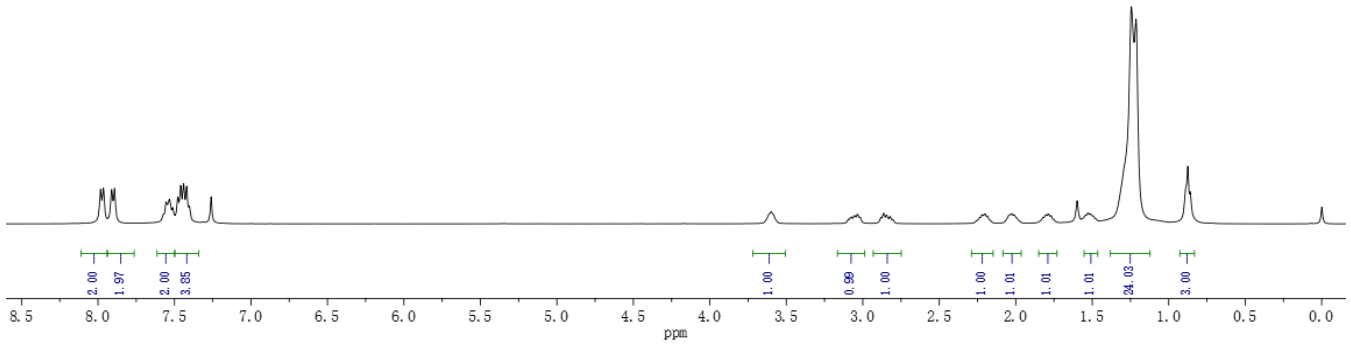

204.09  
199.97

137.28  
136.81  
133.05  
133.03  
128.72  
128.26  
128.14

77.35  
77.24  
77.03  
76.72

45.19  
35.96  
32.60  
31.94  
29.77  
29.70  
29.68  
29.63  
29.57  
29.43  
27.88  
26.10  
22.71  
14.14

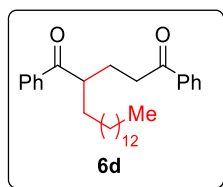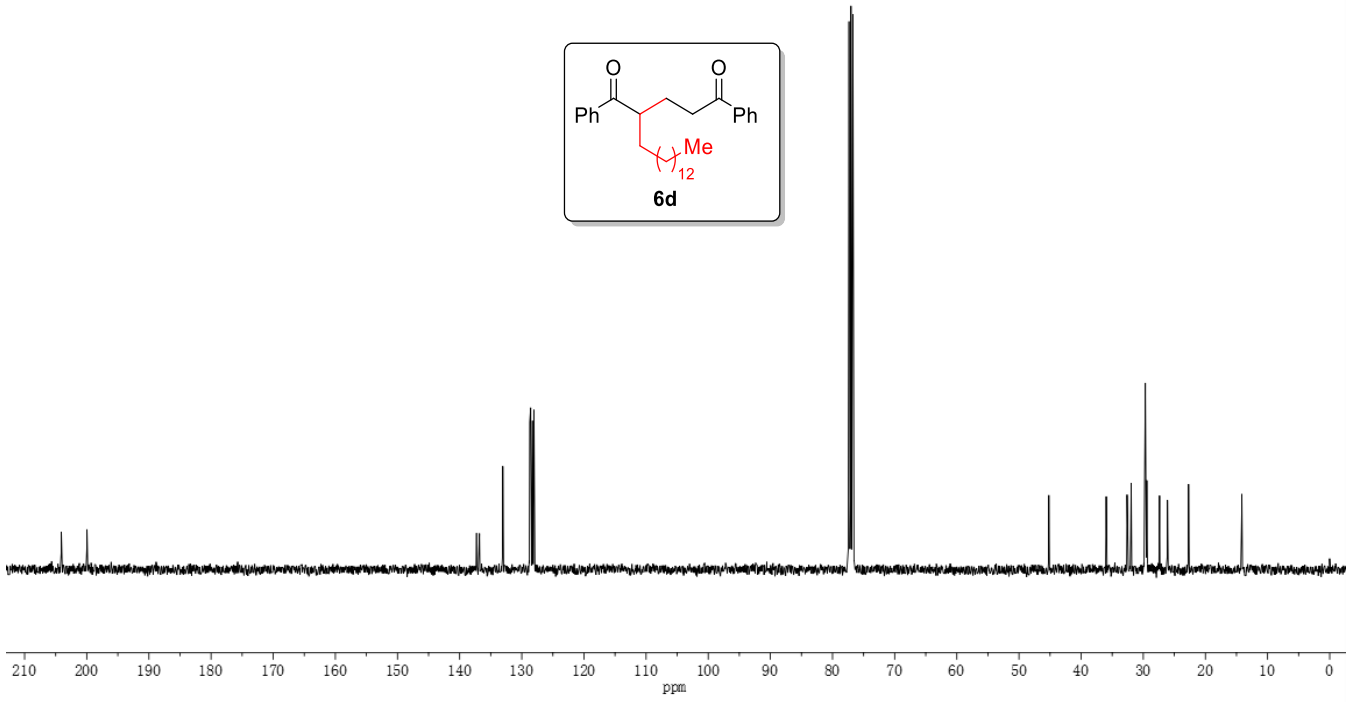



7.89  
7.87  
7.85  
7.73  
7.73  
7.71  
7.55  
7.53  
7.51  
7.51  
7.46  
7.44  
7.42  
7.41  
7.40  
7.39  
7.38  
7.26

5.7  
5.64  
5.61  
5.60  
5.57  
5.54  
5.49  
5.38  
5.38  
5.37  
5.29  
5.29  
5.08  
5.07  
5.06  
5.05  
5.04  
5.03  
5.02  
5.01  
5.00  
5.00  
1.79  
1.77  
1.75  
1.72  
1.70  
1.62  
1.60  
1.57

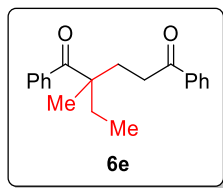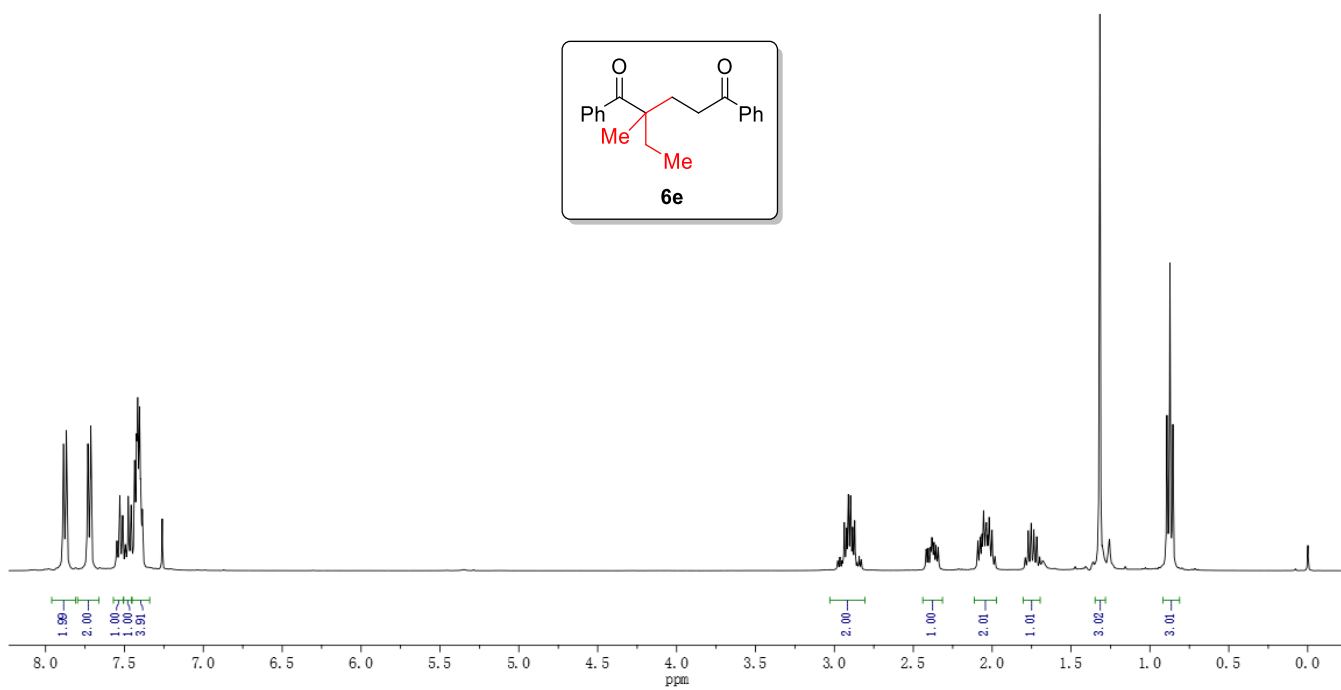

— 208.28

— 199.85

— 139.15

— 136.72

— 133.68

— 131.22

— 128.59

— 128.35

— 127.59

— 77.95

— 77.05

— 76.75

— 51.31

— 33.99

— 32.47

— 32.41

— 22.74

— 8.888

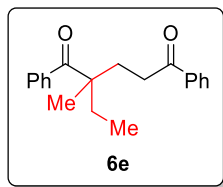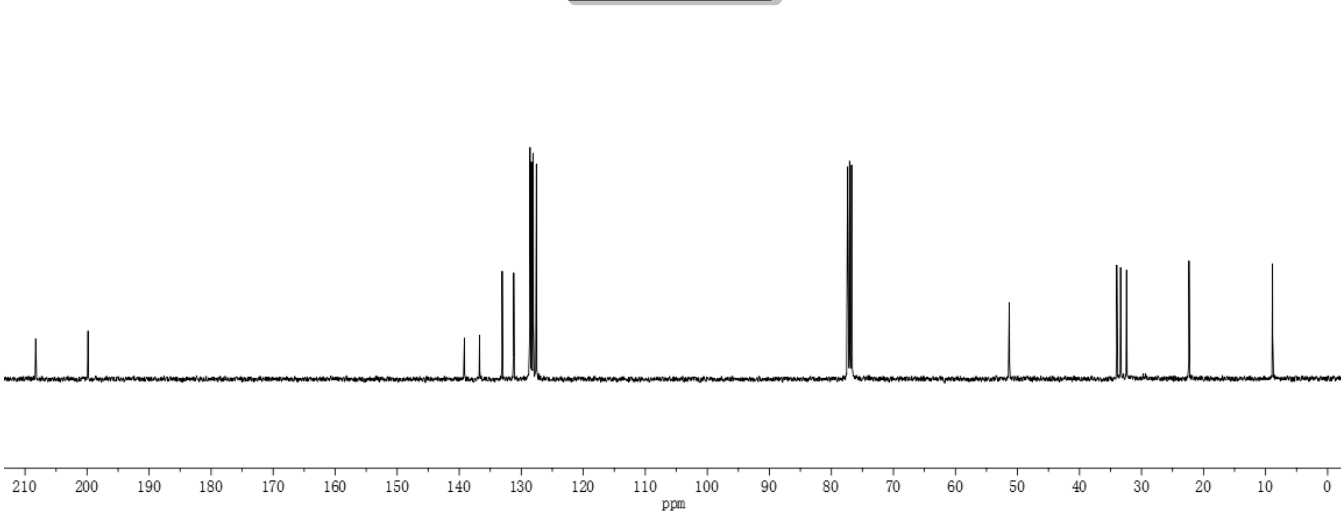



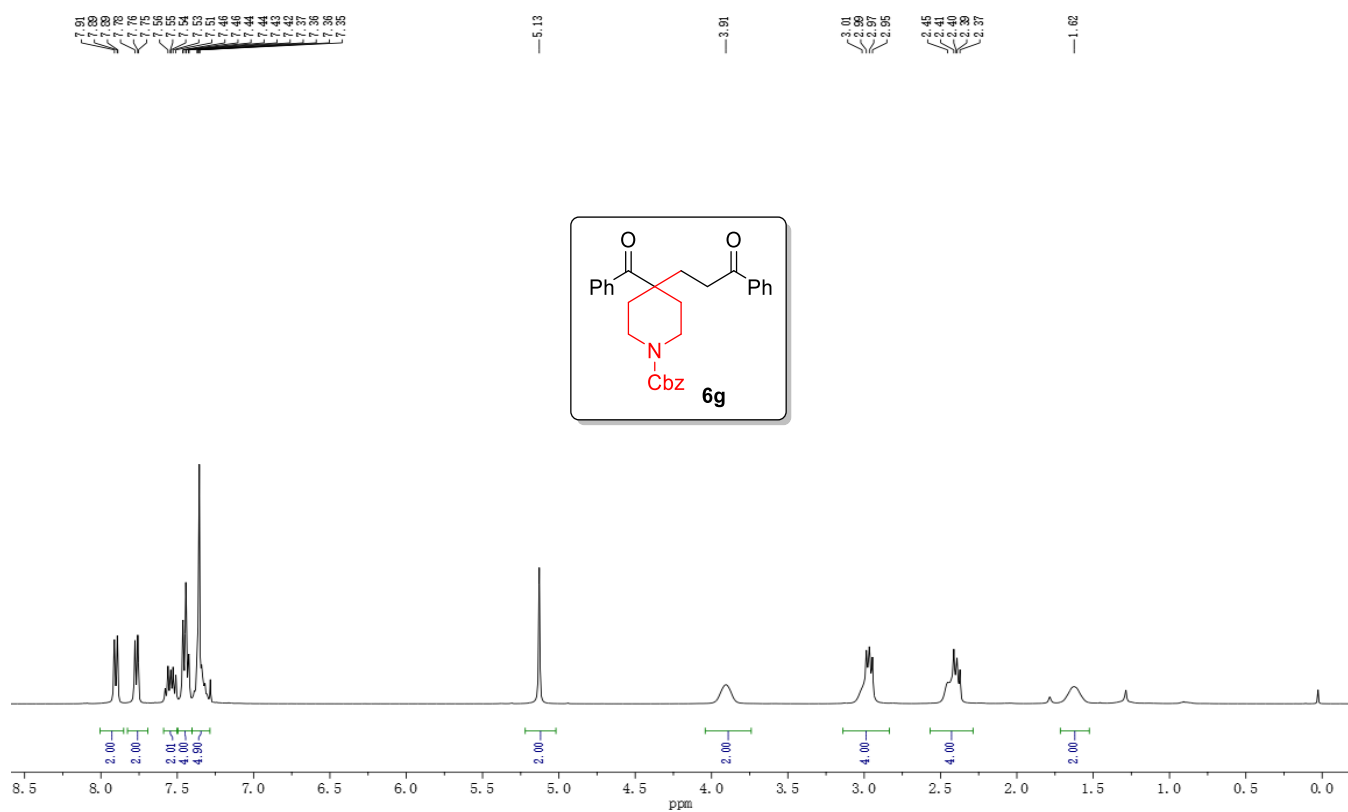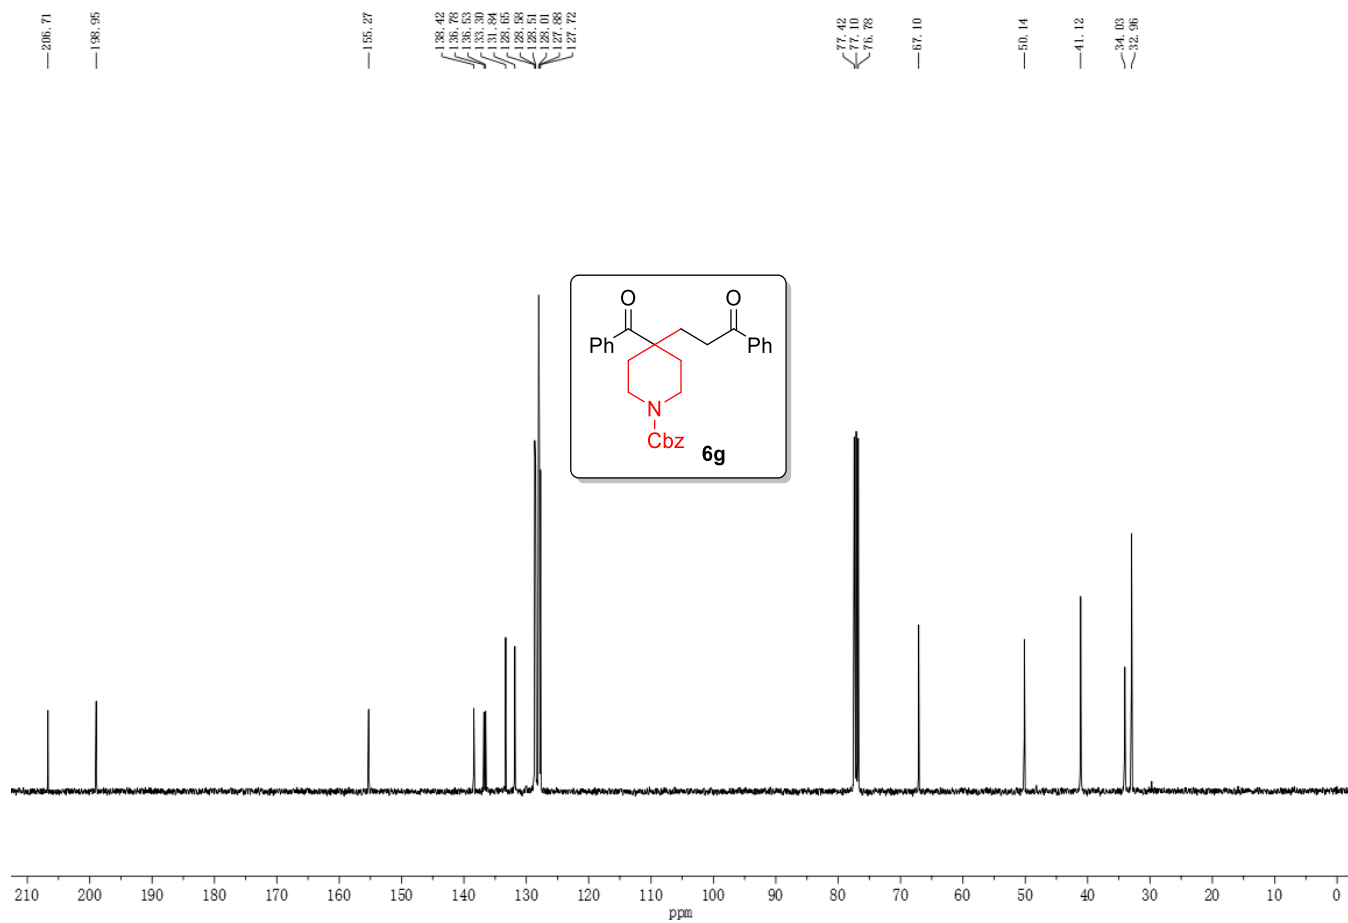

7.92  
7.91  
7.90  
7.89  
7.88  
7.87  
7.86  
7.85  
7.84  
7.83  
7.82  
7.81  
7.80  
7.79  
7.78  
7.77  
7.76  
7.75  
7.74  
7.73  
7.72  
7.71  
7.70  
7.69  
7.68  
7.67  
7.66  
7.65  
7.64  
7.63  
7.62  
7.61  
7.60  
7.59  
7.58  
7.57  
7.56  
7.55  
7.54  
7.53  
7.52  
7.51  
7.50  
7.49  
7.48  
7.47  
7.46  
7.45  
7.44  
7.43  
7.42  
7.41  
7.40  
7.39  
7.38  
7.37  
7.36  
7.35  
7.34

3.73  
3.72  
3.71  
3.70  
3.69  
3.11  
3.10  
3.08  
3.06  
3.05  
3.04  
3.03  
3.02  
3.01  
3.00  
2.74  
2.73  
2.72  
1.95  
1.94  
1.93  
1.92  
1.91  
1.90  
1.89  
1.88  
1.87  
1.86  
1.85  
1.84  
1.83  
1.82  
1.81  
1.80  
1.79  
1.78  
1.77  
1.76  
1.75  
1.74  
1.73  
1.72  
1.71  
1.70  
1.69  
1.68  
1.67  
1.66  
1.65  
1.64  
1.63  
1.62  
1.61  
1.60  
1.59  
1.58  
1.57  
1.56  
1.55  
1.54  
1.53  
1.52  
1.51  
1.50  
1.49  
1.48  
1.47  
1.46  
1.45  
1.44  
1.43  
1.42

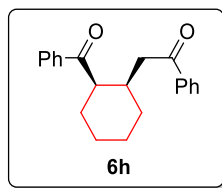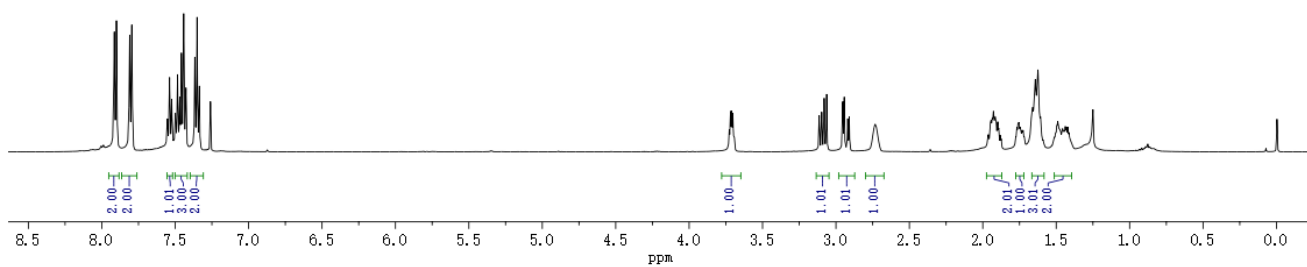

203.80  
191.76

137.06  
136.79  
132.84  
128.71  
128.49  
128.23  
128.05

77.33  
77.07  
76.82

46.50  
33.76  
33.57  
29.25  
27.71  
22.79

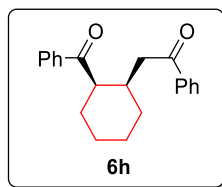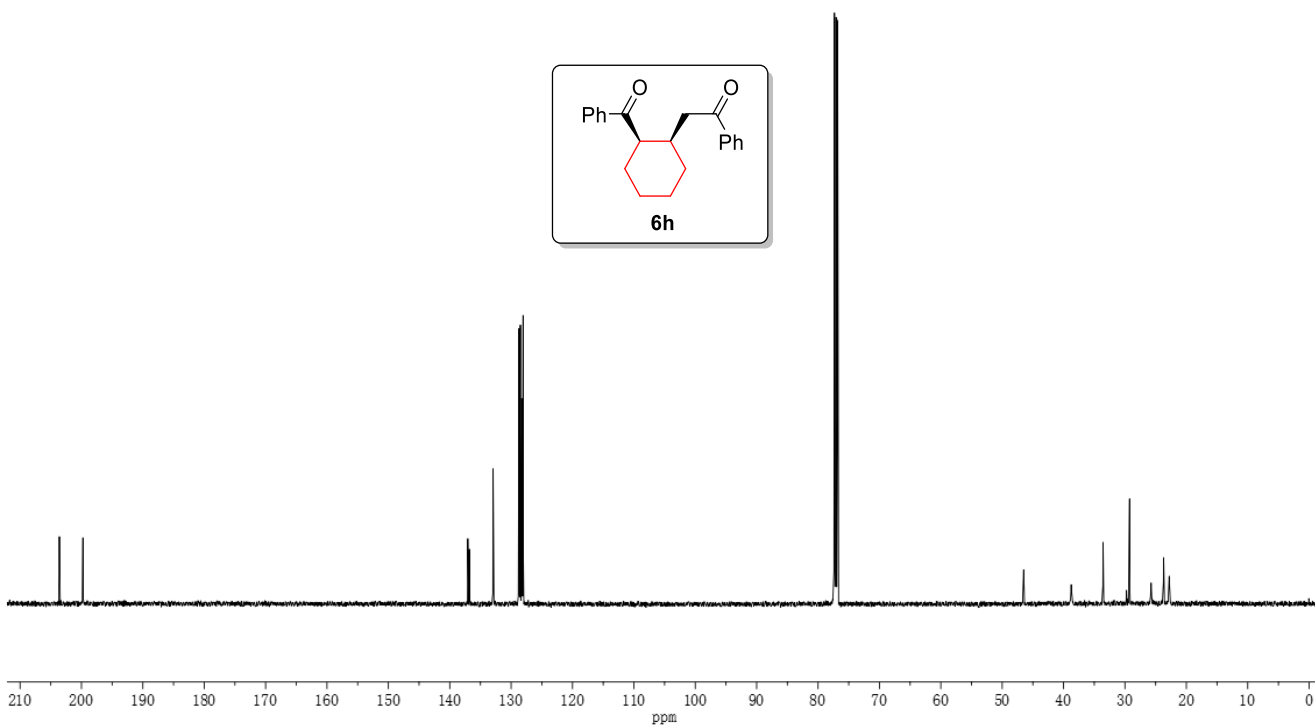

8.05 8.03 8.01 7.99 7.97 7.95 7.57 7.55 7.53 7.51 7.49 7.47 7.45 7.43 7.41 7.39 7.37 7.35 7.33 7.31 7.29 7.27 7.25 7.23 7.21 7.19 7.17 7.15 7.13 7.11 7.09 7.07 7.05 7.03 7.01 6.99 6.97 6.95 6.93 6.91 6.89 6.87 6.85 6.83 6.81 6.79 6.77 6.75 6.73 6.71 6.69 6.67 6.65 6.63 6.61 6.59 6.57 6.55 6.53 6.51 6.49 6.47 6.45 6.43 6.41 6.39 6.37 6.35 6.33 6.31 6.29 6.27 6.25 6.23 6.21 6.19 6.17 6.15 6.13 6.11 6.09 6.07 6.05 6.03 6.01 5.99 5.97 5.95 5.93 5.91 5.89 5.87 5.85 5.83 5.81 5.79 5.77 5.75 5.73 5.71 5.69 5.67 5.65 5.63 5.61 5.59 5.57 5.55 5.53 5.51 5.49 5.47 5.45 5.43 5.41 5.39 5.37 5.35 5.33 5.31 5.29 5.27 5.25 5.23 5.21 5.19 5.17 5.15 5.13 5.11 5.09 5.07 5.05 5.03 5.01 4.99 4.97 4.95 4.93 4.91 4.89 4.87 4.85 4.83 4.81 4.79 4.77 4.75 4.73 4.71 4.69 4.67 4.65 4.63 4.61 4.59 4.57 4.55 4.53 4.51 4.49 4.47 4.45 4.43 4.41 4.39 4.37 4.35 4.33 4.31 4.29 4.27 4.25 4.23 4.21 4.19 4.17 4.15 4.13 4.11 4.09 4.07 4.05 4.03 4.01 3.99 3.97 3.95 3.93 3.91 3.89 3.87 3.85 3.83 3.81 3.79 3.77 3.75 3.73 3.71 3.69 3.67 3.65 3.63 3.61 3.59 3.57 3.55 3.53 3.51 3.49 3.47 3.45 3.43 3.41 3.39 3.37 3.35 3.33 3.31 3.29 3.27 3.25 3.23 3.21 3.19 3.17 3.15 3.13 3.11 3.09 3.07 3.05 3.03 3.01 2.99 2.97 2.95 2.93 2.91 2.89 2.87 2.85 2.83 2.81 2.79 2.77 2.75 2.73 2.71 2.69 2.67 2.65 2.63 2.61 2.59 2.57 2.55 2.53 2.51 2.49 2.47 2.45 2.43 2.41 2.39 2.37 2.35 2.33 2.31 2.29 2.27 2.25 2.23 2.21 2.19 2.17 2.15 2.13 2.11 2.09 2.07 2.05 2.03 2.01 1.99 1.97 1.95 1.93 1.91 1.89 1.87 1.85 1.83 1.81 1.79 1.77 1.75 1.73 1.71 1.69 1.67 1.65 1.63 1.61 1.59 1.57 1.55 1.53 1.51 1.49 1.47 1.45 1.43 1.41 1.39 1.37 1.35 1.33 1.31 1.29 1.27 1.25 1.23 1.21 1.19 1.17 1.15 1.13 1.11 1.09 1.07 1.05 1.03 1.01 0.99 0.97 0.95 0.93 0.91 0.89 0.87 0.85 0.83 0.81 0.79 0.77 0.75 0.73 0.71 0.69 0.67 0.65 0.63 0.61 0.59 0.57 0.55 0.53 0.51 0.49 0.47 0.45 0.43 0.41 0.39 0.37 0.35 0.33 0.31 0.29 0.27 0.25 0.23 0.21 0.19 0.17 0.15 0.13 0.11 0.09 0.07 0.05 0.03 0.01

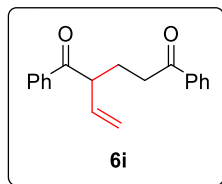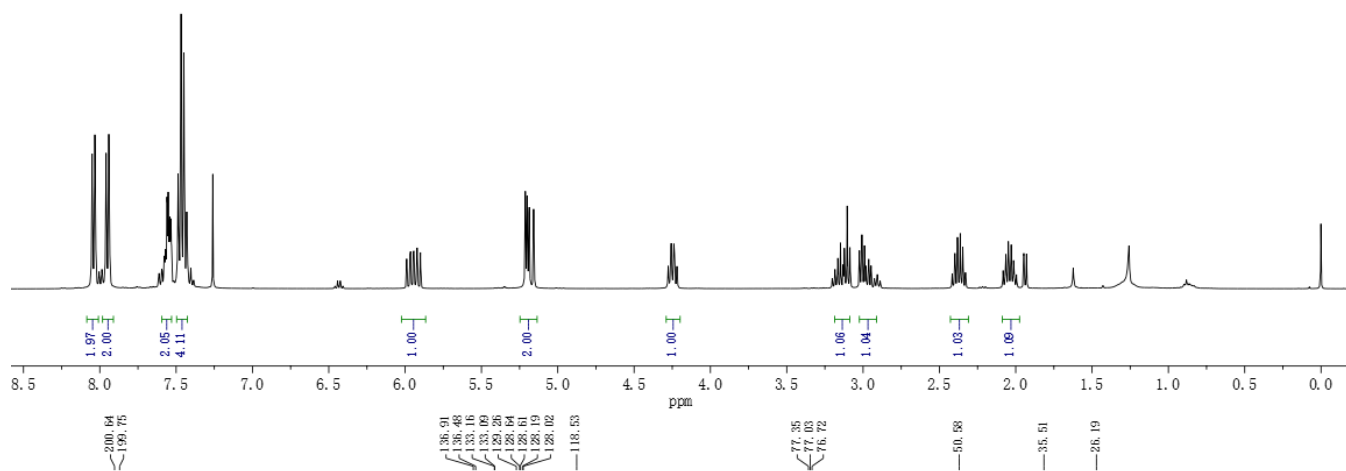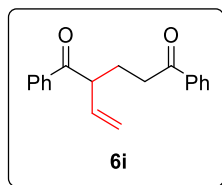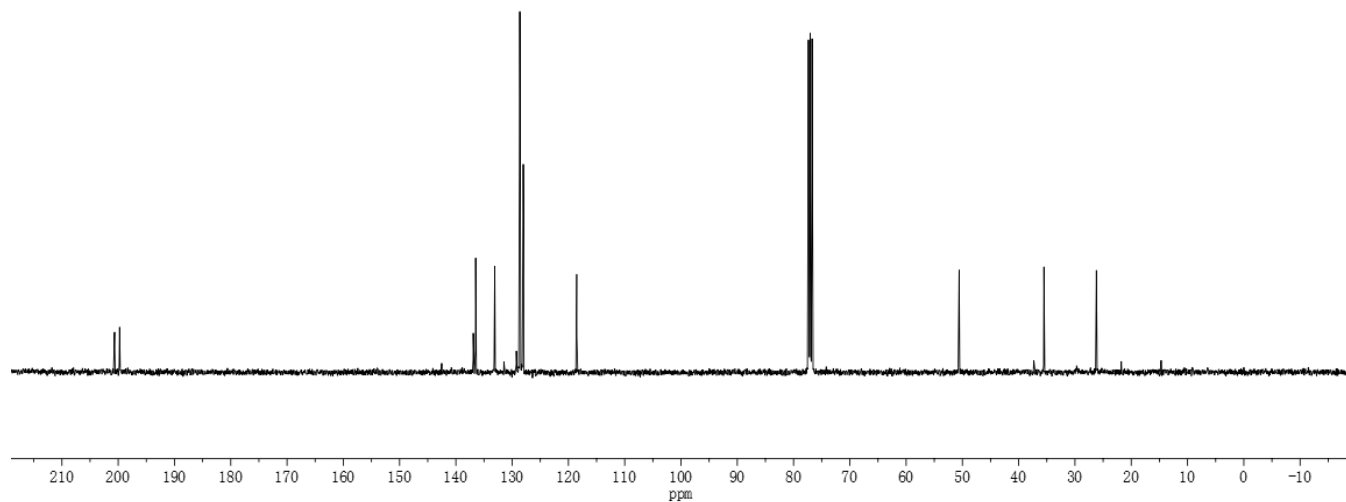

8.03  
7.99  
7.97  
7.95  
7.93  
7.91  
7.89  
7.87  
7.85  
7.83  
7.81  
7.79  
7.77  
7.75  
7.73  
7.71  
7.69  
7.67  
7.65  
7.63  
7.61  
7.59  
7.57  
7.55  
7.53  
7.51  
7.49  
7.47  
7.45  
7.43  
7.41  
7.39  
7.37  
7.35  
7.33  
7.31  
7.29  
7.27  
7.25  
7.23  
7.21  
7.19  
7.17  
7.15  
7.13  
7.11  
7.09  
7.07  
7.05  
7.03  
7.01  
6.99  
6.97  
6.95  
6.93  
6.91  
6.89  
6.87  
6.85  
6.83  
6.81  
6.79  
6.77  
6.75  
6.73  
6.71  
6.69  
6.67  
6.65  
6.63  
6.61  
6.59  
6.57  
6.55  
6.53  
6.51  
6.49  
6.47  
6.45  
6.43  
6.41  
6.39  
6.37  
6.35  
6.33  
6.31  
6.29  
6.27  
6.25  
6.23  
6.21  
6.19  
6.17  
6.15  
6.13  
6.11  
6.09  
6.07  
6.05  
6.03  
6.01  
5.99  
5.97  
5.95  
5.93  
5.91  
5.89  
5.87  
5.85  
5.83  
5.81  
5.79  
5.77  
5.75  
5.73  
5.71  
5.69  
5.67  
5.65  
5.63  
5.61  
5.59  
5.57  
5.55  
5.53  
5.51  
5.49  
5.47  
5.45  
5.43  
5.41  
5.39  
5.37  
5.35  
5.33  
5.31  
5.29  
5.27  
5.25  
5.23  
5.21  
5.19  
5.17  
5.15  
5.13  
5.11  
5.09  
5.07  
5.05  
5.03  
5.01  
4.99  
4.97  
4.95  
4.93  
4.91  
4.89  
4.87  
4.85  
4.83  
4.81  
4.79  
4.77  
4.75  
4.73  
4.71  
4.69  
4.67  
4.65  
4.63  
4.61  
4.59  
4.57  
4.55  
4.53  
4.51  
4.49  
4.47  
4.45  
4.43  
4.41  
4.39  
4.37  
4.35  
4.33  
4.31  
4.29  
4.27  
4.25  
4.23  
4.21  
4.19  
4.17  
4.15  
4.13  
4.11  
4.09  
4.07  
4.05  
4.03  
4.01  
3.99  
3.97  
3.95  
3.93  
3.91  
3.89  
3.87  
3.85  
3.83  
3.81  
3.79  
3.77  
3.75  
3.73  
3.71  
3.69  
3.67  
3.65  
3.63  
3.61  
3.59  
3.57  
3.55  
3.53  
3.51  
3.49  
3.47  
3.45  
3.43  
3.41  
3.39  
3.37  
3.35  
3.33  
3.31  
3.29  
3.27  
3.25  
3.23  
3.21  
3.19  
3.17  
3.15  
3.13  
3.11  
3.09  
3.07  
3.05  
3.03  
3.01  
2.99  
2.97  
2.95  
2.93  
2.91  
2.89  
2.87  
2.85  
2.83  
2.81  
2.79  
2.77  
2.75  
2.73  
2.71  
2.69  
2.67  
2.65  
2.63  
2.61  
2.59  
2.57  
2.55  
2.53  
2.51  
2.49  
2.47  
2.45  
2.43  
2.41  
2.39  
2.37  
2.35  
2.33  
2.31  
2.29  
2.27  
2.25  
2.23  
2.21  
2.19  
2.17  
2.15  
2.13  
2.11  
2.09  
2.07  
2.05  
2.03  
2.01  
1.99  
1.97  
1.95  
1.93  
1.91  
1.89  
1.87  
1.85  
1.83  
1.81  
1.79  
1.77  
1.75  
1.73  
1.71  
1.69  
1.67  
1.65  
1.63  
1.61  
1.59  
1.57  
1.55  
1.53  
1.51  
1.49  
1.47  
1.45  
1.43  
1.41  
1.39  
1.37  
1.35  
1.33  
1.31  
1.29  
1.27  
1.25  
1.23  
1.21  
1.19  
1.17  
1.15  
1.13  
1.11  
1.09  
1.07  
1.05  
1.03  
1.01  
0.99  
0.97  
0.95  
0.93  
0.91  
0.89  
0.87  
0.85  
0.83  
0.81  
0.79  
0.77  
0.75  
0.73  
0.71  
0.69  
0.67  
0.65  
0.63  
0.61  
0.59  
0.57  
0.55  
0.53  
0.51  
0.49  
0.47  
0.45  
0.43  
0.41  
0.39  
0.37  
0.35  
0.33  
0.31  
0.29  
0.27  
0.25  
0.23  
0.21  
0.19  
0.17  
0.15  
0.13  
0.11  
0.09  
0.07  
0.05  
0.03  
0.01  
0.00

2.90  
2.88  
2.87  
2.86  
2.85  
2.84  
2.83  
2.82  
2.81  
2.80  
2.79  
2.78  
2.77  
2.76  
2.75  
2.74  
2.73  
2.72  
2.71  
2.70  
2.69  
2.68  
2.67  
2.66  
2.65  
2.64  
2.63  
2.62  
2.61  
2.60  
2.59  
2.58  
2.57  
2.56  
2.55  
2.54  
2.53  
2.52  
2.51  
2.50  
2.49  
2.48  
2.47  
2.46  
2.45  
2.44  
2.43  
2.42  
2.41  
2.40  
2.39  
2.38  
2.37  
2.36  
2.35  
2.34  
2.33  
2.32  
2.31  
2.30  
2.29  
2.28  
2.27  
2.26  
2.25  
2.24  
2.23  
2.22  
2.21  
2.20  
2.19  
2.18  
2.17  
2.16  
2.15  
2.14  
2.13  
2.12  
2.11  
2.10  
2.09  
2.08  
2.07  
2.06  
2.05  
2.04  
2.03  
2.02  
2.01  
2.00  
1.99  
1.98  
1.97  
1.96  
1.95  
1.94  
1.93  
1.92  
1.91  
1.90  
1.89  
1.88  
1.87  
1.86  
1.85  
1.84  
1.83  
1.82  
1.81  
1.80  
1.79  
1.78  
1.77  
1.76  
1.75  
1.74  
1.73  
1.72  
1.71  
1.70  
1.69  
1.68  
1.67  
1.66  
1.65  
1.64  
1.63  
1.62  
1.61  
1.60  
1.59  
1.58  
1.57  
1.56  
1.55  
1.54  
1.53  
1.52  
1.51  
1.50  
1.49  
1.48  
1.47  
1.46  
1.45  
1.44  
1.43  
1.42  
1.41  
1.40  
1.39  
1.38  
1.37  
1.36  
1.35  
1.34  
1.33  
1.32  
1.31  
1.30  
1.29  
1.28  
1.27  
1.26  
1.25  
1.24  
1.23  
1.22  
1.21  
1.20  
1.19  
1.18  
1.17  
1.16  
1.15  
1.14  
1.13  
1.12  
1.11  
1.10  
1.09  
1.08  
1.07  
1.06  
1.05  
1.04  
1.03  
1.02  
1.01  
1.00  
0.99  
0.98  
0.97  
0.96  
0.95  
0.94  
0.93  
0.92  
0.91  
0.90  
0.89  
0.88  
0.87  
0.86  
0.85  
0.84  
0.83  
0.82  
0.81  
0.80  
0.79  
0.78  
0.77  
0.76  
0.75  
0.74  
0.73  
0.72  
0.71  
0.70  
0.69  
0.68  
0.67  
0.66  
0.65  
0.64  
0.63  
0.62  
0.61  
0.60  
0.59  
0.58  
0.57  
0.56  
0.55  
0.54  
0.53  
0.52  
0.51  
0.50  
0.49  
0.48  
0.47  
0.46  
0.45  
0.44  
0.43  
0.42  
0.41  
0.40  
0.39  
0.38  
0.37  
0.36  
0.35  
0.34  
0.33  
0.32  
0.31  
0.30  
0.29  
0.28  
0.27  
0.26  
0.25  
0.24  
0.23  
0.22  
0.21  
0.20  
0.19  
0.18  
0.17  
0.16  
0.15  
0.14  
0.13  
0.12  
0.11  
0.10  
0.09  
0.08  
0.07  
0.06  
0.05  
0.04  
0.03  
0.02  
0.01  
0.00

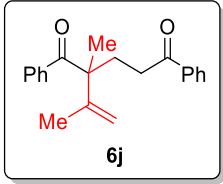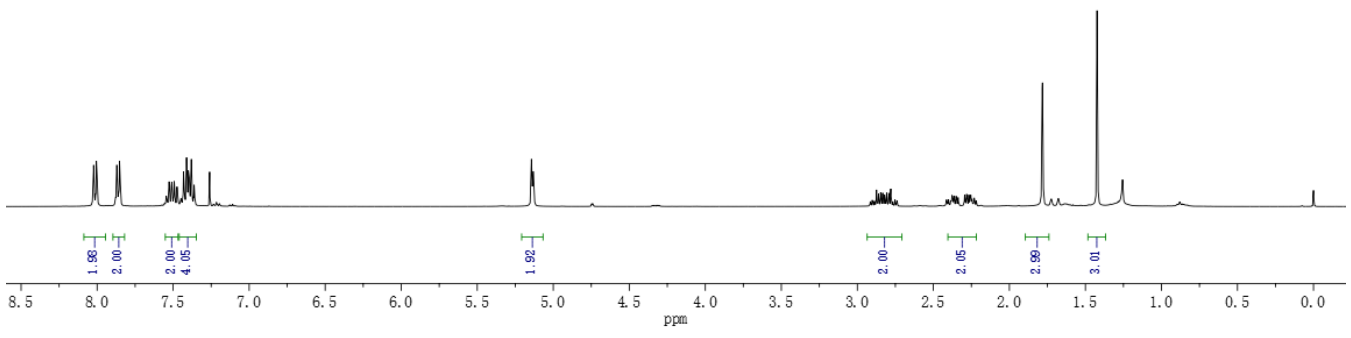

— 203.44  
— 200.01

— 148.00  
— 136.94  
— 136.83  
— 132.77  
— 128.95  
— 128.56  
— 128.26  
— 128.07

— 112.82

— 55.67

— 33.92  
— 31.63

— 22.76  
— 20.67

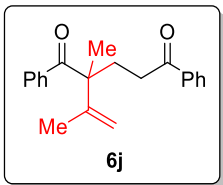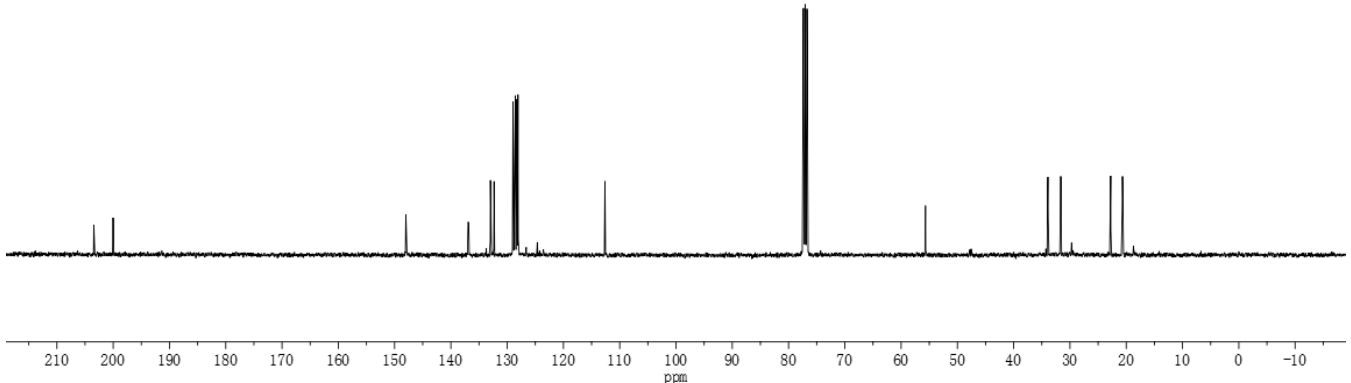

7.89  
7.87  
7.87  
7.82  
7.80  
7.79  
7.77  
7.77  
7.72  
7.70  
7.53  
7.51  
7.50  
7.47  
7.46  
7.43  
7.42  
7.41  
7.40  
7.39  
7.39  
7.37  
7.26  
5.37  
5.37  
5.27  
5.26

3.93  
3.91  
3.90  
3.89  
3.88  
3.87  
3.86  
3.84  
3.81  
3.78  
4.45  
4.42  
4.41  
4.32  
4.32  
4.31  
4.29  
4.05  
4.03  
4.01  
3.99  
3.88  
3.87  
3.86  
3.82  
3.81  
3.78

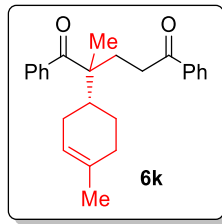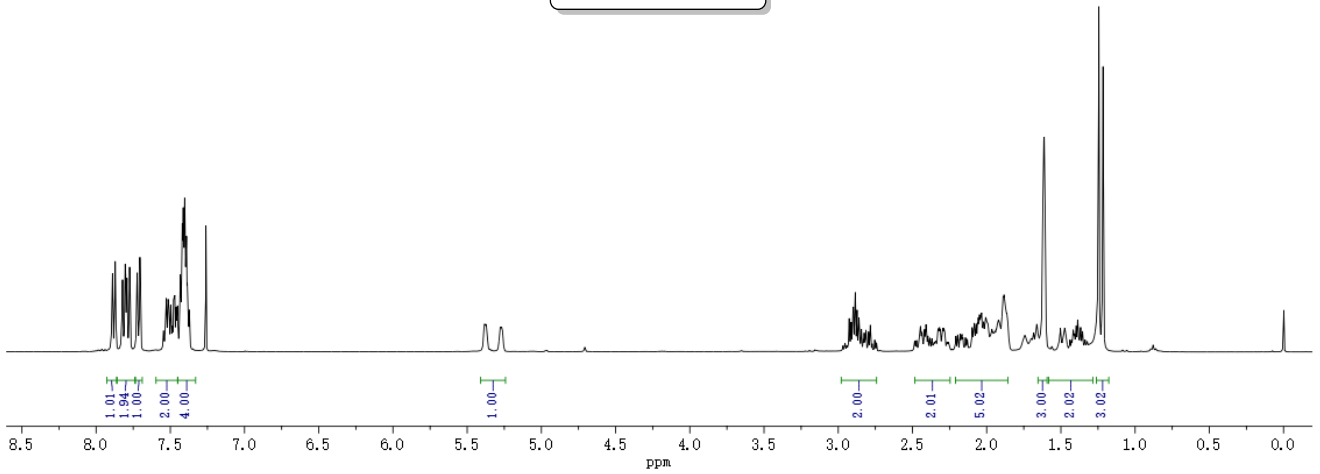

208.78  
207.80

199.90  
199.83

139.49  
138.06  
136.70  
136.63  
134.00  
133.10  
131.46  
131.16  
128.58  
128.33  
128.08  
128.05  
127.81  
127.61  
126.38

77.38  
77.06  
76.74

54.09  
54.03

41.67  
40.62  
34.07  
33.98  
31.72  
31.14  
27.11  
26.24  
25.26  
24.04  
23.32  
18.65

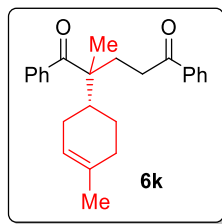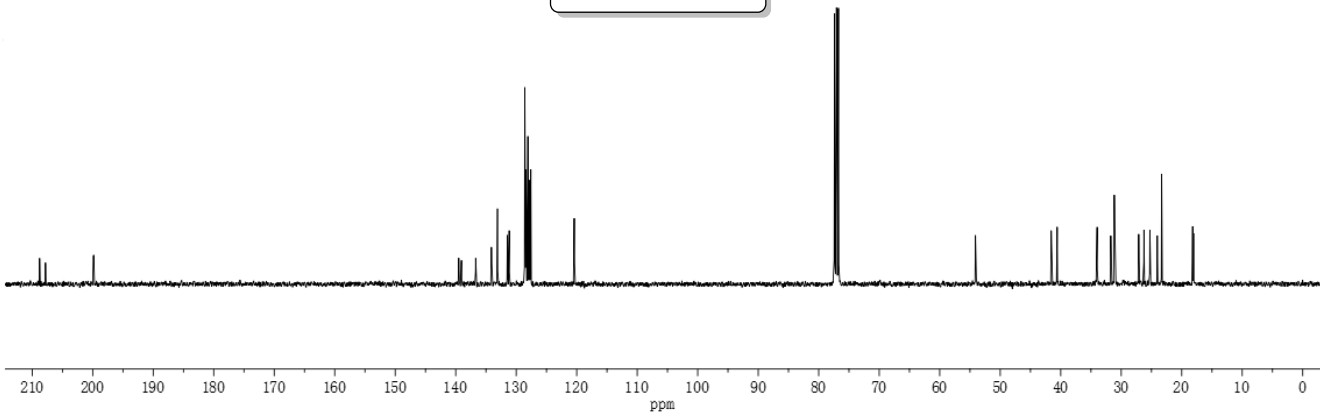

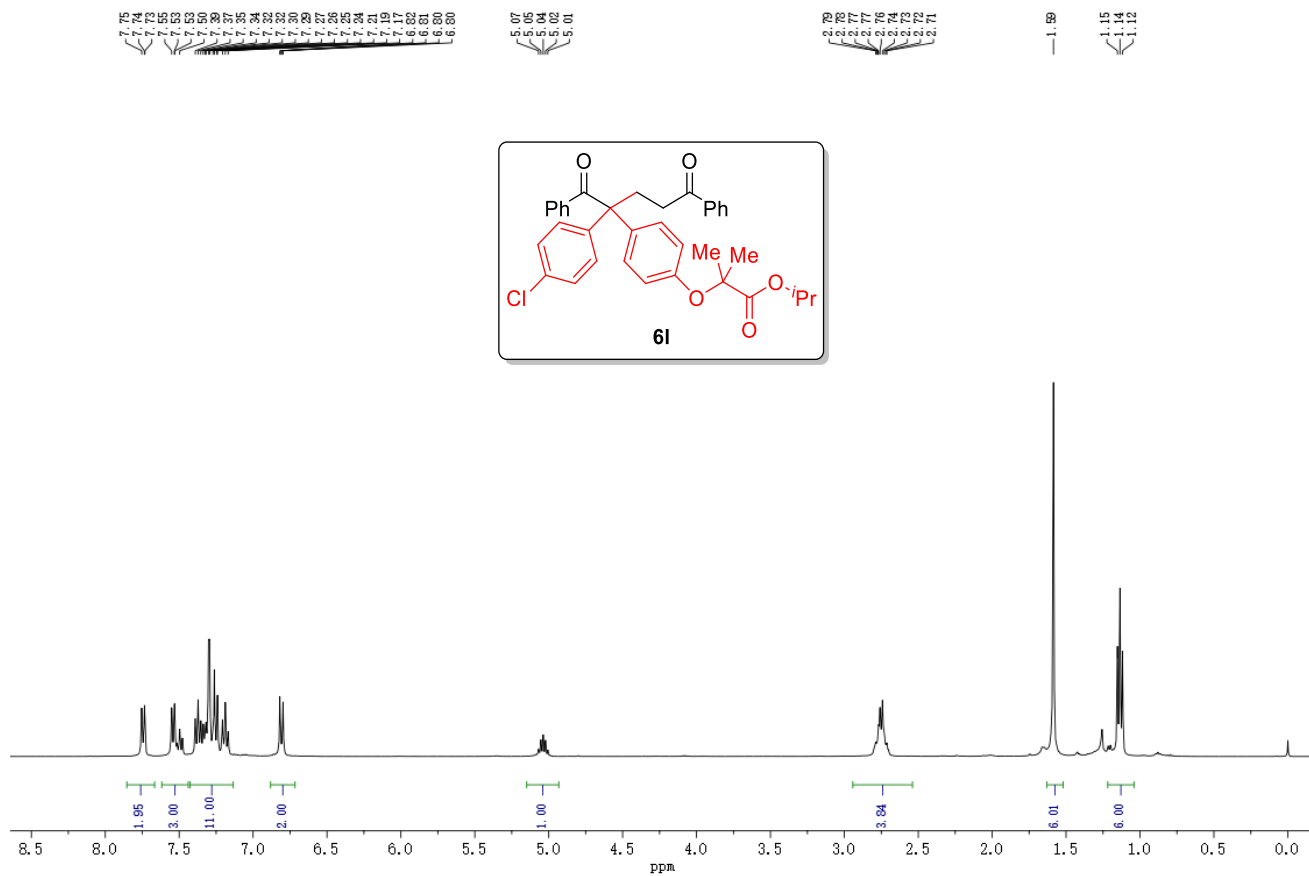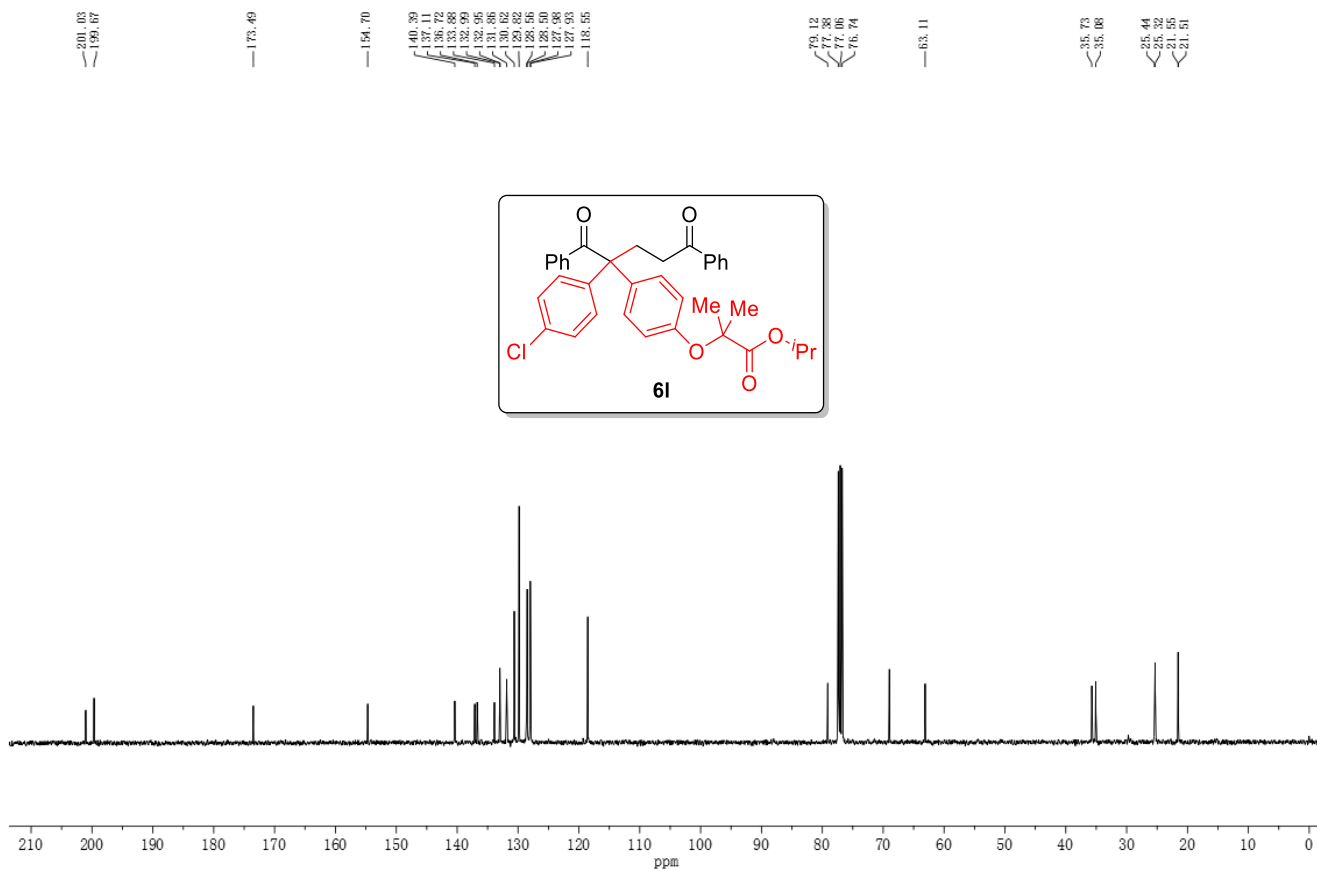



7.77  
7.77  
7.75  
7.74  
7.68  
7.56  
7.47  
7.46  
7.45  
7.44  
7.44  
7.43  
7.42  
7.41  
7.38  
7.35  
7.34  
7.34  
7.33  
7.33  
7.30  
7.30  
7.29  
7.28  
7.19  
7.18  
7.17  
7.15

3.85  
3.85  
3.83  
3.83  
3.82  
3.82  
3.77  
3.75  
3.75  
3.73

1.42  
1.40  
1.40

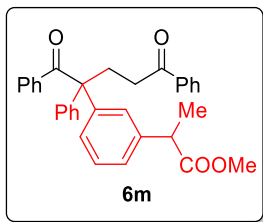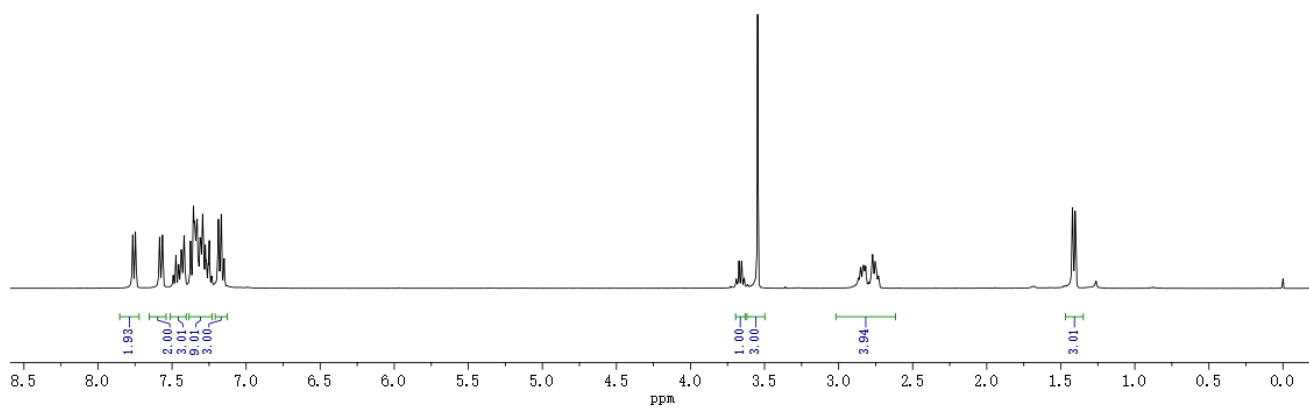

191.25  
159.89

174.88  
174.83

141.76  
141.73  
141.29  
141.26  
140.82  
140.82  
137.31  
136.89  
136.86  
136.86  
133.95  
129.22  
128.06  
128.02  
128.02  
128.73  
128.55  
128.45  
128.05  
128.02  
127.20  
127.20  
126.06

77.40  
77.38  
76.76

64.32  
64.29

51.95

45.46  
45.36

36.03  
35.22

18.59  
18.30

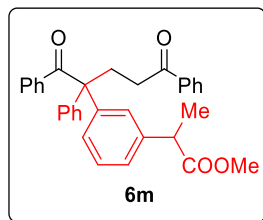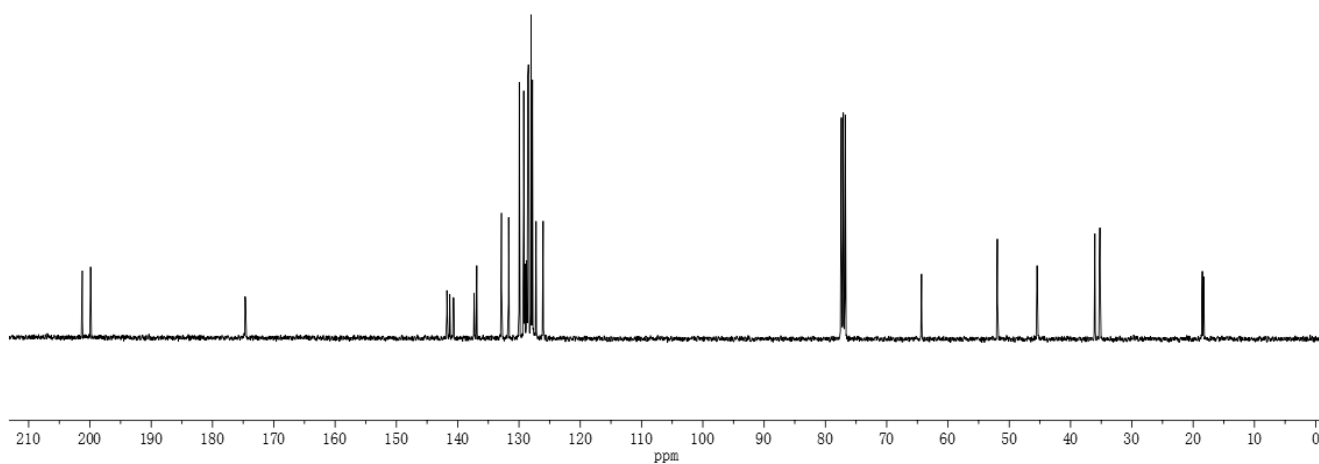





7.86  
7.84  
7.63  
7.61  
7.49  
7.45  
7.42  
7.40  
7.33  
7.30  
7.26

4.03  
4.01

7.00  
6.98  
6.96  
6.94  
6.92  
6.90  
6.88  
6.86  
6.84  
6.82  
6.80  
6.78  
6.76  
6.74  
6.72  
6.70  
6.68  
6.66  
6.64  
6.62  
6.60  
6.58  
6.56  
6.54  
6.52  
6.50  
6.48  
6.46  
6.44  
6.42  
6.40  
6.38  
6.36  
6.34  
6.32  
6.30  
6.28  
6.26  
6.24  
6.22  
6.20  
6.18  
6.16  
6.14  
6.12  
6.10  
6.08  
6.06  
6.04  
6.02  
6.00  
5.98  
5.96  
5.94  
5.92  
5.90  
5.88  
5.86  
5.84  
5.82  
5.80  
5.78  
5.76  
5.74  
5.72  
5.70  
5.68  
5.66  
5.64  
5.62  
5.60  
5.58  
5.56  
5.54  
5.52  
5.50  
5.48  
5.46  
5.44  
5.42  
5.40  
5.38  
5.36  
5.34  
5.32  
5.30  
5.28  
5.26  
5.24  
5.22  
5.20  
5.18  
5.16  
5.14  
5.12  
5.10  
5.08  
5.06  
5.04  
5.02  
5.00  
4.98  
4.96  
4.94  
4.92  
4.90  
4.88  
4.86  
4.84  
4.82  
4.80  
4.78  
4.76  
4.74  
4.72  
4.70  
4.68  
4.66  
4.64  
4.62  
4.60  
4.58  
4.56  
4.54  
4.52  
4.50  
4.48  
4.46  
4.44  
4.42  
4.40  
4.38  
4.36  
4.34  
4.32  
4.30  
4.28  
4.26  
4.24  
4.22  
4.20  
4.18  
4.16  
4.14  
4.12  
4.10  
4.08  
4.06  
4.04  
4.02  
4.00  
3.98  
3.96  
3.94  
3.92  
3.90  
3.88  
3.86  
3.84  
3.82  
3.80  
3.78  
3.76  
3.74  
3.72  
3.70  
3.68  
3.66  
3.64  
3.62  
3.60  
3.58  
3.56  
3.54  
3.52  
3.50  
3.48  
3.46  
3.44  
3.42  
3.40  
3.38  
3.36  
3.34  
3.32  
3.30  
3.28  
3.26  
3.24  
3.22  
3.20  
3.18  
3.16  
3.14  
3.12  
3.10  
3.08  
3.06  
3.04  
3.02  
3.00  
2.98  
2.96  
2.94  
2.92  
2.90  
2.88  
2.86  
2.84  
2.82  
2.80  
2.78  
2.76  
2.74  
2.72  
2.70  
2.68  
2.66  
2.64  
2.62  
2.60  
2.58  
2.56  
2.54  
2.52  
2.50  
2.48  
2.46  
2.44  
2.42  
2.40  
2.38  
2.36  
2.34  
2.32  
2.30  
2.28  
2.26  
2.24  
2.22  
2.20  
2.18  
2.16  
2.14  
2.12  
2.10  
2.08  
2.06  
2.04  
2.02  
2.00  
1.98  
1.96  
1.94  
1.92  
1.90  
1.88  
1.86  
1.84  
1.82  
1.80  
1.78  
1.76  
1.74  
1.72  
1.70  
1.68  
1.66  
1.64  
1.62  
1.60  
1.58  
1.56  
1.54  
1.52  
1.50  
1.48  
1.46  
1.44  
1.42  
1.40  
1.38  
1.36  
1.34  
1.32  
1.30  
1.28  
1.26  
1.24  
1.22  
1.20  
1.18  
1.16  
1.14  
1.12  
1.10  
1.08  
1.06  
1.04  
1.02  
1.00  
0.98  
0.96  
0.94  
0.92  
0.90  
0.88  
0.86  
0.84  
0.82  
0.80  
0.78  
0.76  
0.74  
0.72  
0.70  
0.68  
0.66  
0.64  
0.62  
0.60  
0.58  
0.56  
0.54  
0.52  
0.50  
0.48  
0.46  
0.44  
0.42  
0.40  
0.38  
0.36  
0.34  
0.32  
0.30  
0.28  
0.26  
0.24  
0.22  
0.20  
0.18  
0.16  
0.14  
0.12  
0.10  
0.08  
0.06  
0.04  
0.02  
0.00

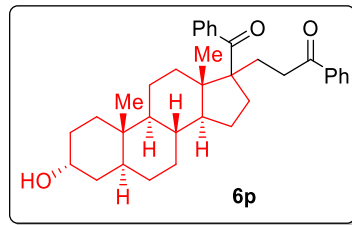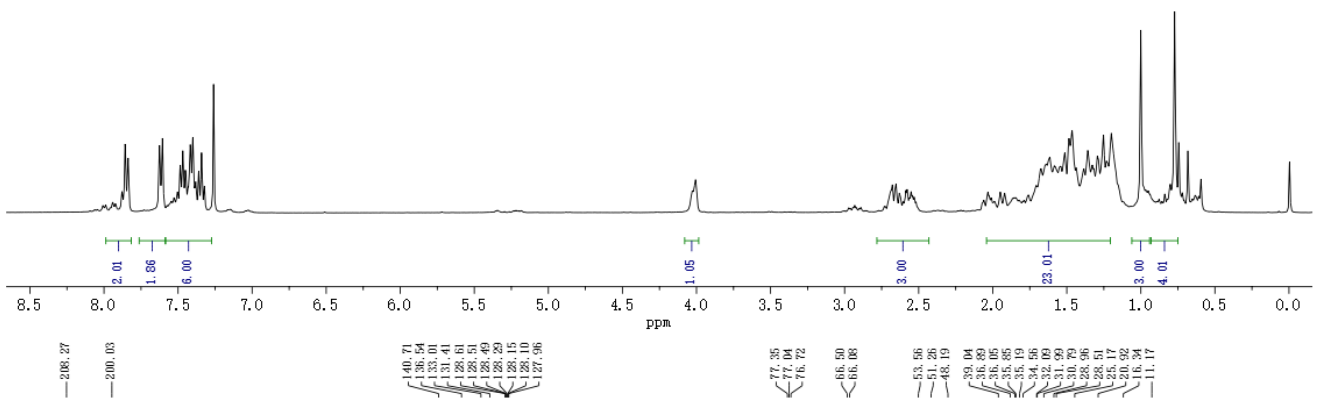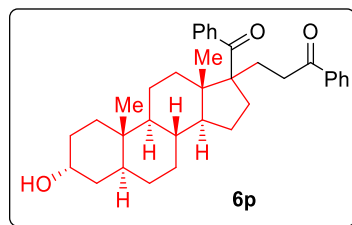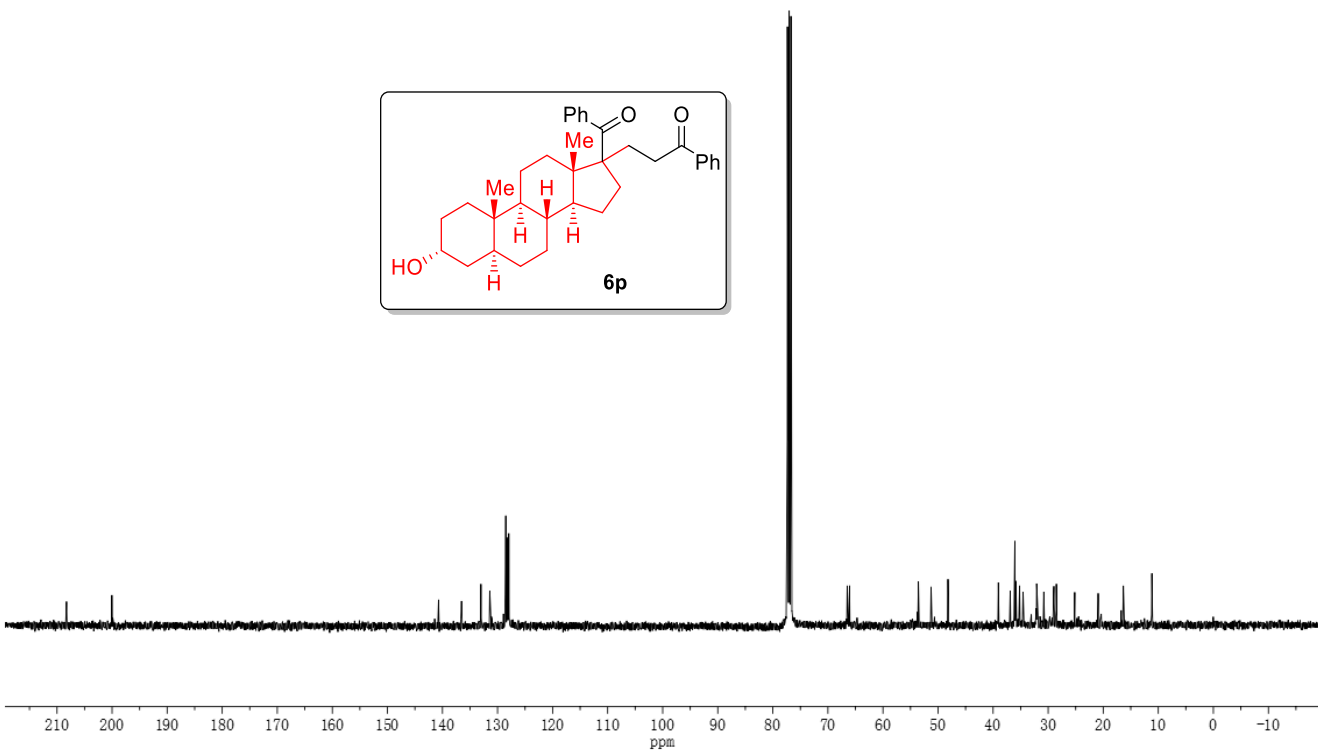

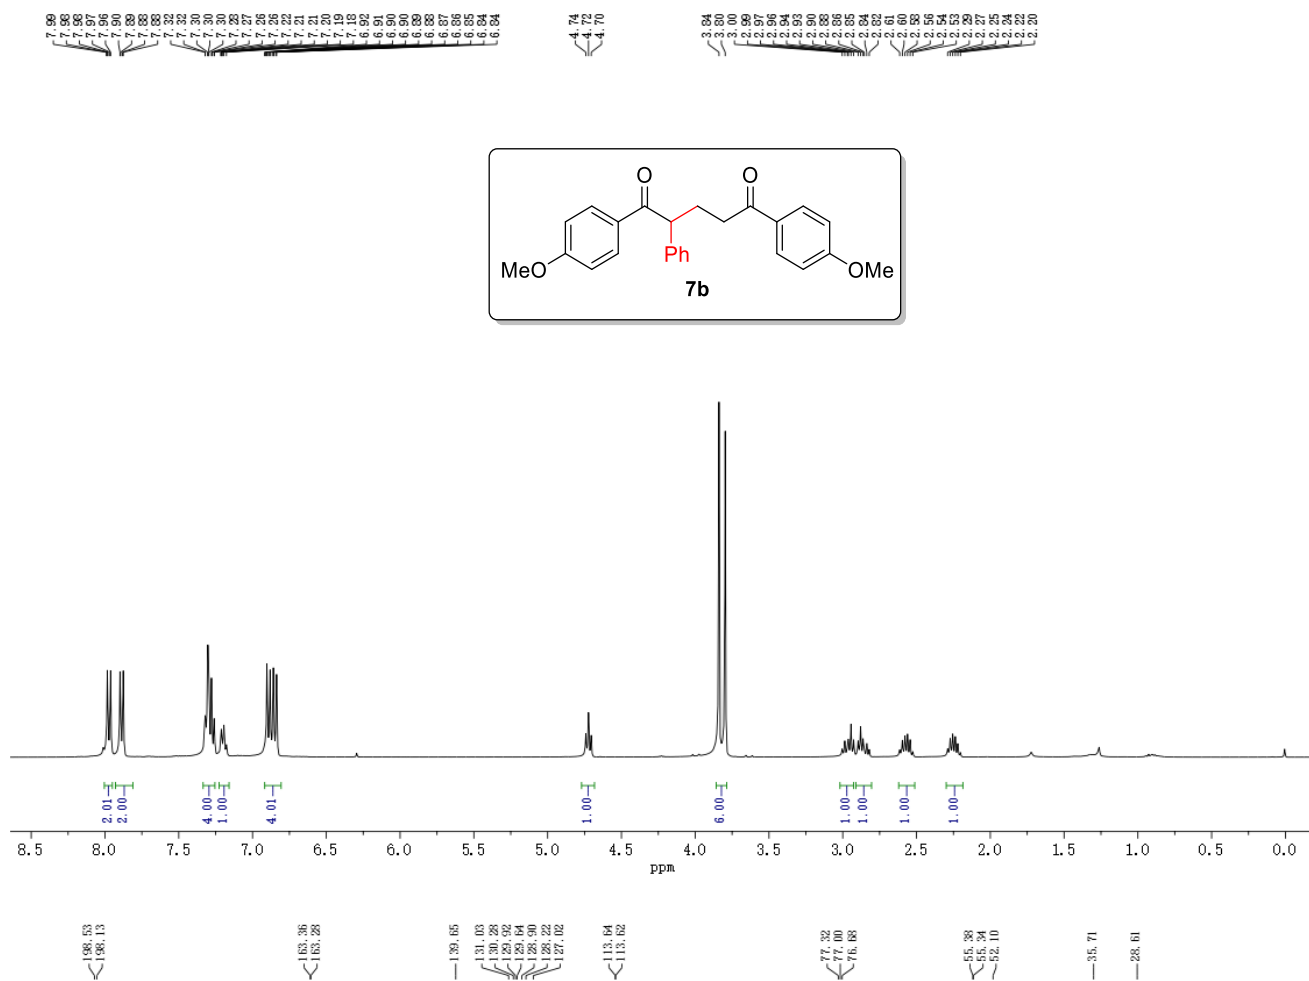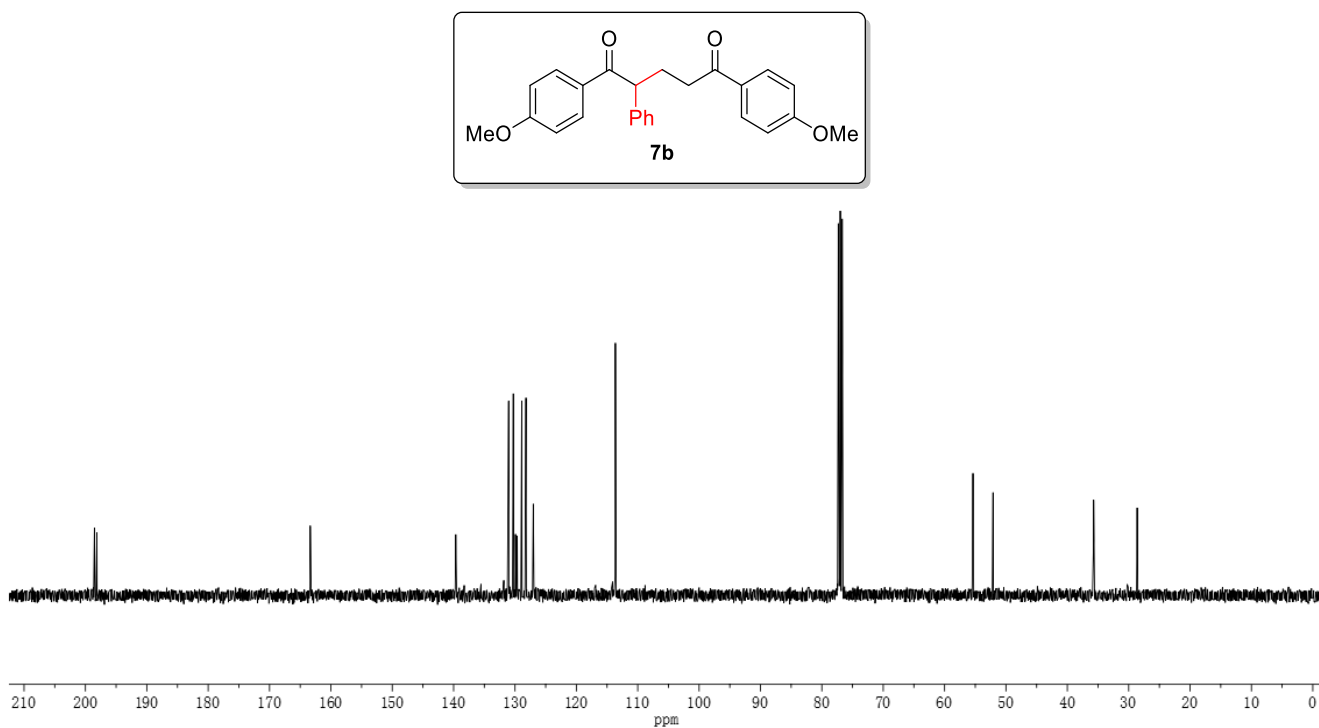

7.910  
7.888  
7.882  
7.860  
7.800  
7.333  
7.332  
7.311  
7.300  
7.293  
7.288  
7.286  
7.285  
7.223  
7.221  
7.211  
7.210  
7.191  
7.116

4.77  
4.76  
4.74

3.03  
3.01  
3.00  
2.99  
2.97  
2.95  
2.95  
2.94  
2.91  
2.89  
2.87  
2.86  
2.85  
2.83  
2.81  
2.79  
2.78  
2.74  
2.73  
2.72  
2.71  
2.69  
2.68  
2.67  
2.66  
2.64  
2.63  
2.62  
2.61  
2.59  
2.58  
2.57  
2.56  
2.54  
2.54  
2.54  
2.53  
2.52  
2.51  
2.50  
2.49  
2.47  
2.44  
2.43  
2.42  
2.41  
2.39  
2.38  
2.37  
2.36  
2.34  
2.33  
2.32  
2.31  
2.29  
2.28  
2.27  
2.26  
2.24  
2.23  
2.22  
2.21  
2.19  
2.18  
2.17  
2.16  
2.14  
2.13  
2.12  
2.11  
2.09  
2.08  
2.07  
2.06  
2.04  
2.03  
2.02  
2.01  
2.00  
1.99  
1.97  
1.95  
1.95  
1.94  
1.91  
1.89  
1.87  
1.86  
1.85  
1.83  
1.81  
1.79  
1.78  
1.77  
1.76  
1.74  
1.73  
1.72  
1.71  
1.69  
1.68  
1.67  
1.66  
1.64  
1.63  
1.62  
1.61  
1.59  
1.58  
1.57  
1.56  
1.54  
1.54  
1.54  
1.53  
1.52  
1.51  
1.49  
1.47  
1.44  
1.43  
1.42  
1.41  
1.39  
1.38  
1.37  
1.36  
1.34  
1.33  
1.32  
1.31  
1.29  
1.28  
1.27  
1.26  
1.24  
1.23  
1.22  
1.21  
1.19  
1.18  
1.17  
1.16  
1.14  
1.13  
1.12  
1.11  
1.09  
1.08  
1.07  
1.06  
1.04  
1.03  
1.02  
1.01  
1.00  
0.99  
0.97  
0.95  
0.95  
0.94  
0.91  
0.89  
0.87  
0.86  
0.85  
0.83  
0.81  
0.79  
0.78  
0.77  
0.76  
0.74  
0.73  
0.72  
0.71  
0.69  
0.68  
0.67  
0.66  
0.64  
0.63  
0.62  
0.61  
0.59  
0.58  
0.57  
0.56  
0.54  
0.54  
0.54  
0.53  
0.52  
0.51  
0.49  
0.47  
0.44  
0.43  
0.42  
0.41  
0.39  
0.38  
0.37  
0.36  
0.34  
0.33  
0.32  
0.31  
0.29  
0.28  
0.27  
0.26  
0.24  
0.23  
0.22  
0.21  
0.19  
0.18  
0.17  
0.16  
0.14  
0.13  
0.12  
0.11  
0.09  
0.08  
0.07  
0.06  
0.04  
0.03  
0.02  
0.01  
0.00

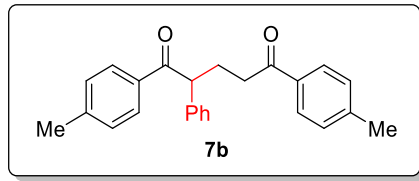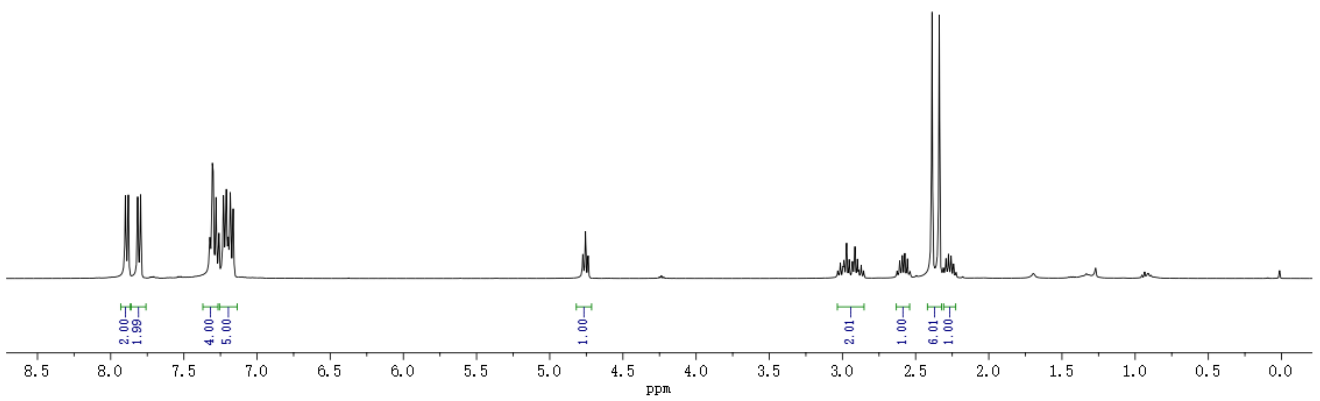

199.56  
196.21

145.72  
145.66  
136.41  
134.35  
134.13  
134.16  
128.93  
128.87  
128.27  
128.12  
127.07

77.32  
77.00  
76.88

52.29

35.89

28.38

21.58  
21.52

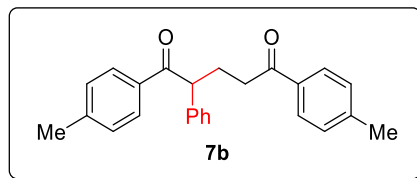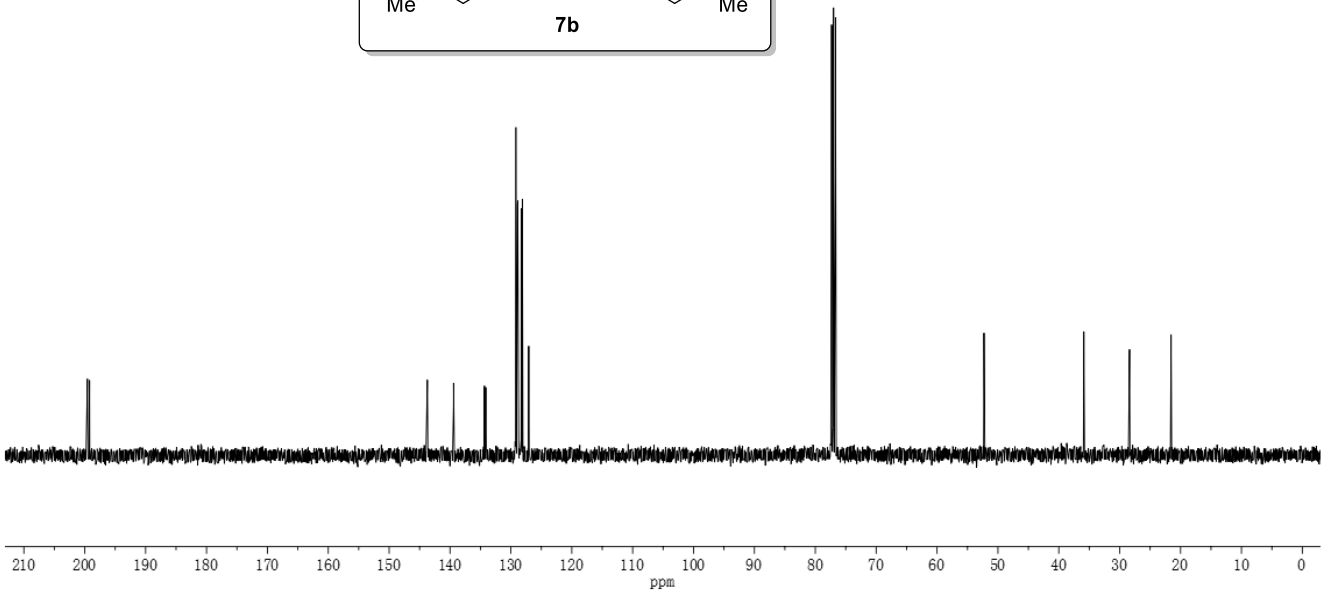

7.63  
7.61  
7.59  
7.56  
7.54  
7.44  
7.41  
7.37  
7.35  
7.32  
7.31  
7.30  
7.29  
7.27  
7.26  
7.25  
7.24

4.73  
4.71  
4.69

3.00  
2.99  
2.98  
2.96  
2.94  
2.91  
2.89  
2.88  
2.87  
2.86  
2.85  
2.84  
2.83

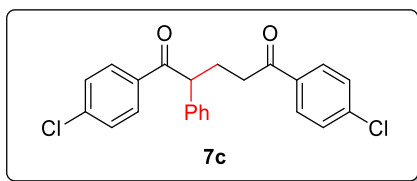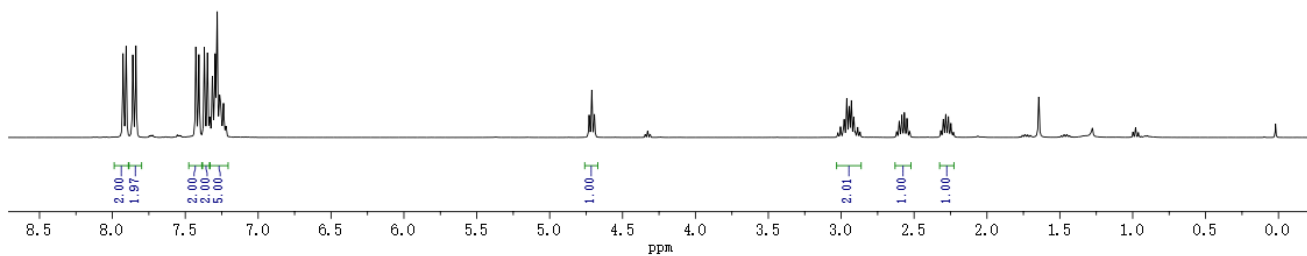

198.58  
198.27

139.53  
139.39  
138.72  
135.04  
130.77  
129.42  
129.18  
128.88  
128.53  
127.43

77.32  
77.00  
76.68

52.44

35.79

28.06

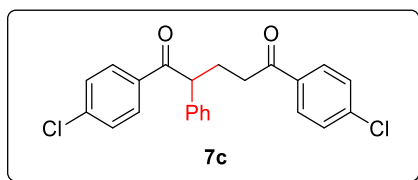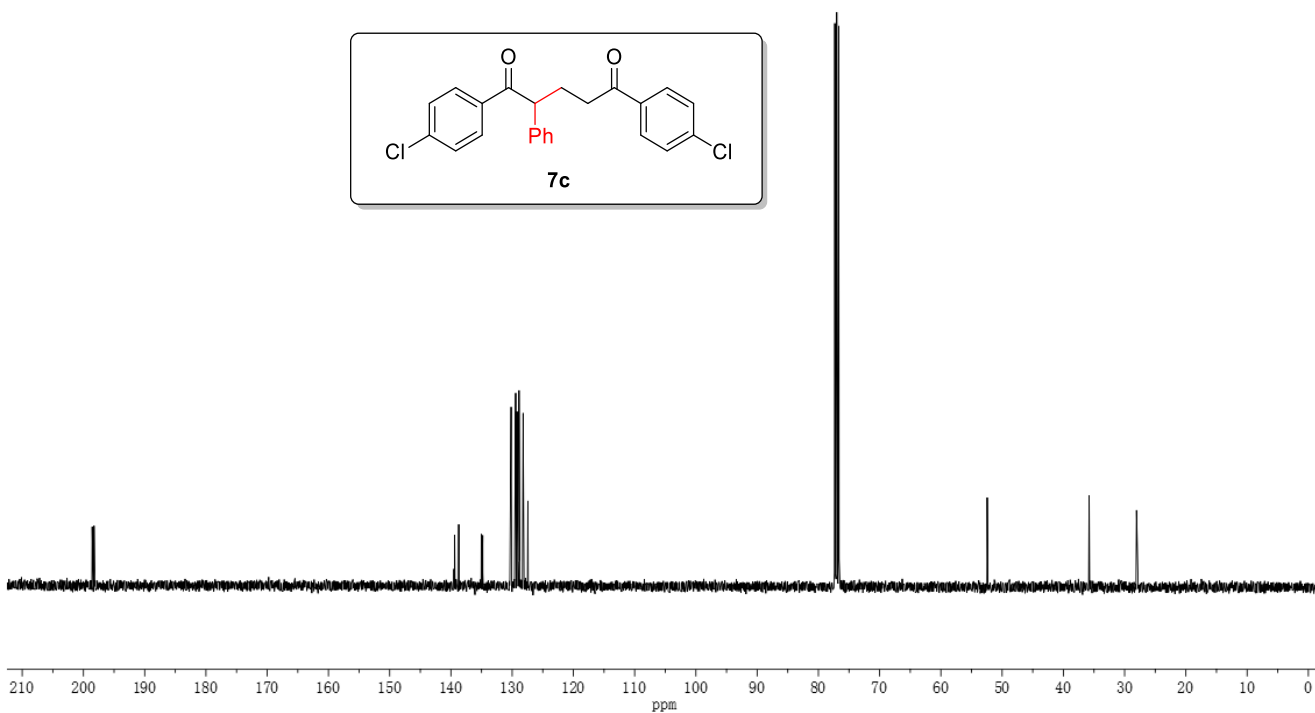





8.05  
8.03  
7.97  
7.69  
7.63  
7.61  
7.59  
7.57  
7.28  
7.26  
7.24  
7.22

4.76  
4.74  
4.72

3.03  
3.01  
2.99  
2.97  
2.95  
2.93  
2.91  
2.89  
2.87  
2.85  
2.83  
2.81  
2.79  
2.77  
2.75  
2.73  
2.71  
2.69  
2.67  
2.65  
2.63  
2.61  
2.59  
2.57  
2.55  
2.53  
2.51  
2.49  
2.47  
2.45  
2.43  
2.41  
2.39  
2.37  
2.35  
2.33  
2.31  
2.29  
2.27  
2.25  
2.23  
2.21  
2.19  
2.17  
2.15  
2.13  
2.11  
2.09  
2.07  
2.05  
2.03  
2.01  
1.99  
1.97  
1.95  
1.93  
1.91  
1.89  
1.87  
1.85  
1.83  
1.81  
1.79  
1.77  
1.75  
1.73  
1.71  
1.69  
1.67  
1.65  
1.63  
1.61  
1.59  
1.57  
1.55  
1.53  
1.51  
1.49  
1.47  
1.45  
1.43  
1.41  
1.39  
1.37  
1.35  
1.33  
1.31  
1.29  
1.27  
1.25  
1.23  
1.21  
1.19  
1.17  
1.15  
1.13  
1.11  
1.09  
1.07  
1.05  
1.03  
1.01  
0.99  
0.97  
0.95  
0.93  
0.91  
0.89  
0.87  
0.85  
0.83  
0.81  
0.79  
0.77  
0.75  
0.73  
0.71  
0.69  
0.67  
0.65  
0.63  
0.61  
0.59  
0.57  
0.55  
0.53  
0.51  
0.49  
0.47  
0.45  
0.43  
0.41  
0.39  
0.37  
0.35  
0.33  
0.31  
0.29  
0.27  
0.25  
0.23  
0.21  
0.19  
0.17  
0.15  
0.13  
0.11  
0.09  
0.07  
0.05  
0.03  
0.01

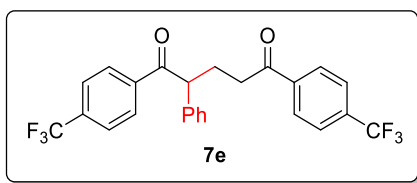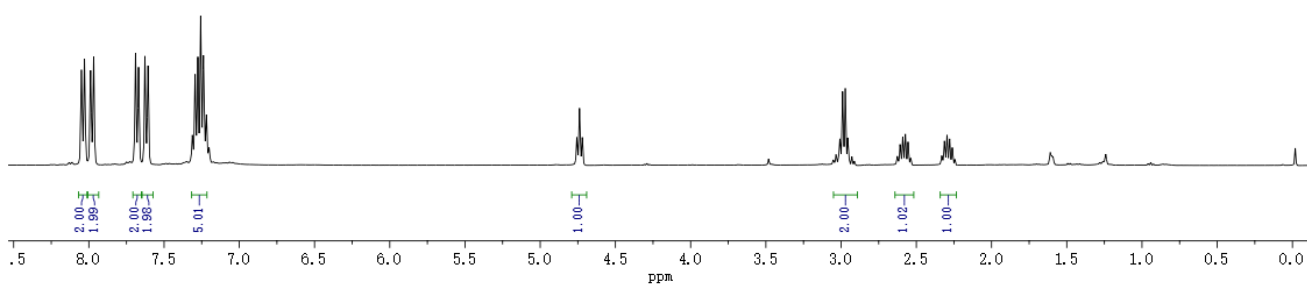

198.79  
198.48

139.35  
139.28  
139.26  
134.83  
134.38  
134.31  
134.09  
134.07  
129.11  
128.37  
128.28  
128.28  
127.89  
127.77  
125.75  
125.69  
125.65  
125.61  
125.57  
124.97  
124.92  
122.22  
122.16

77.35  
77.04  
76.72

52.80

36.07

27.86

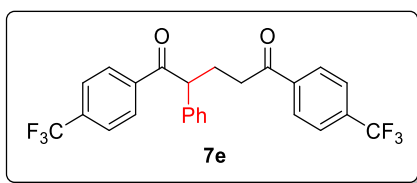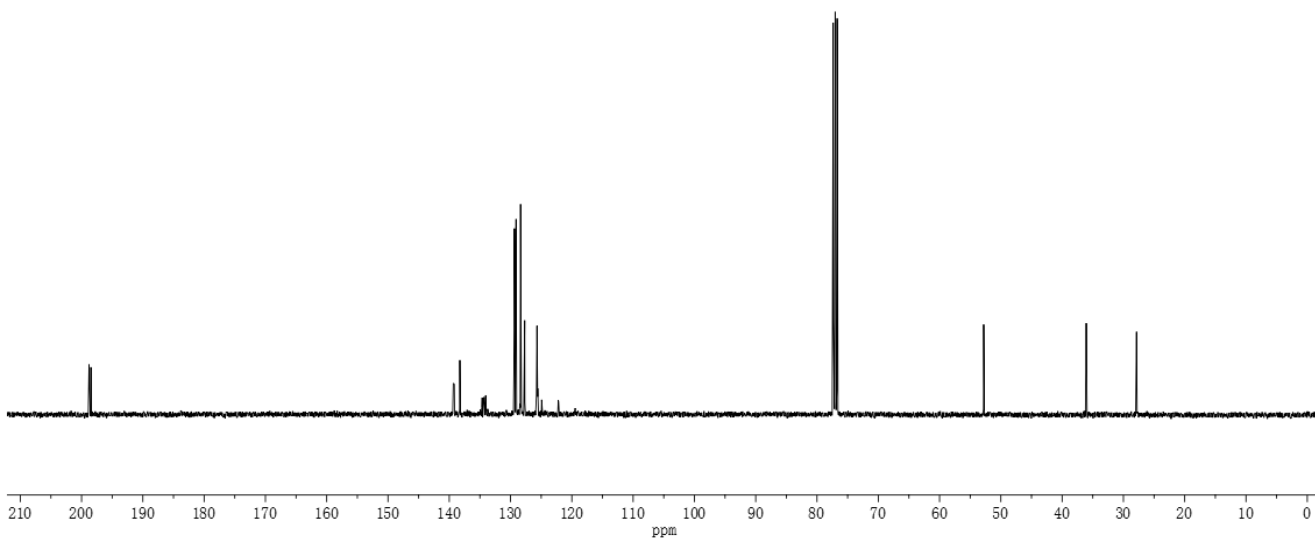

8.03  
8.01  
7.99  
7.97  
7.75  
7.73  
7.68  
7.66  
7.63  
7.61  
7.59  
7.57  
7.55  
7.53  
7.52

4.73  
4.71  
4.70

3.00  
2.99  
2.98  
2.97  
2.96  
2.95  
2.94  
2.93  
2.92  
2.91  
2.90

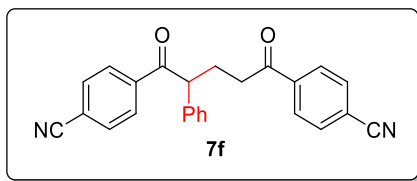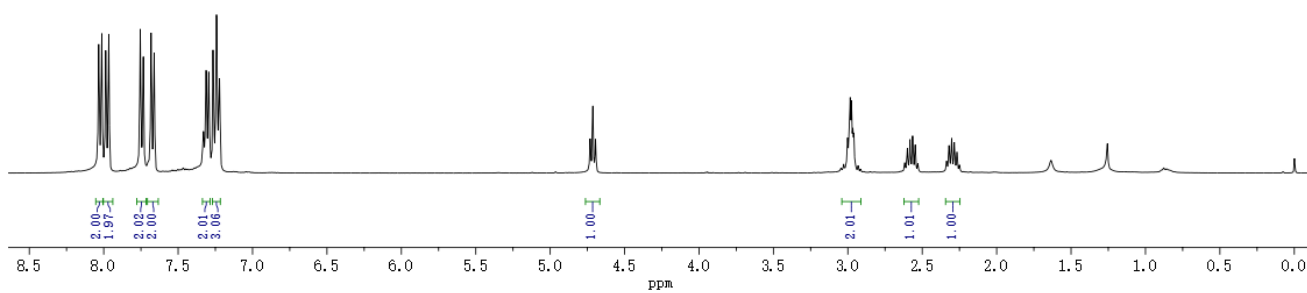

198.27  
197.99

138.51  
137.40  
137.40  
132.46  
132.37  
129.42  
128.10  
128.10  
128.10  
127.80  
117.81  
117.78  
116.44  
116.17

77.32  
77.00  
76.88

52.76

35.94

27.80

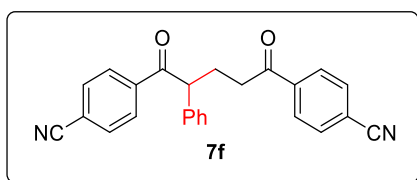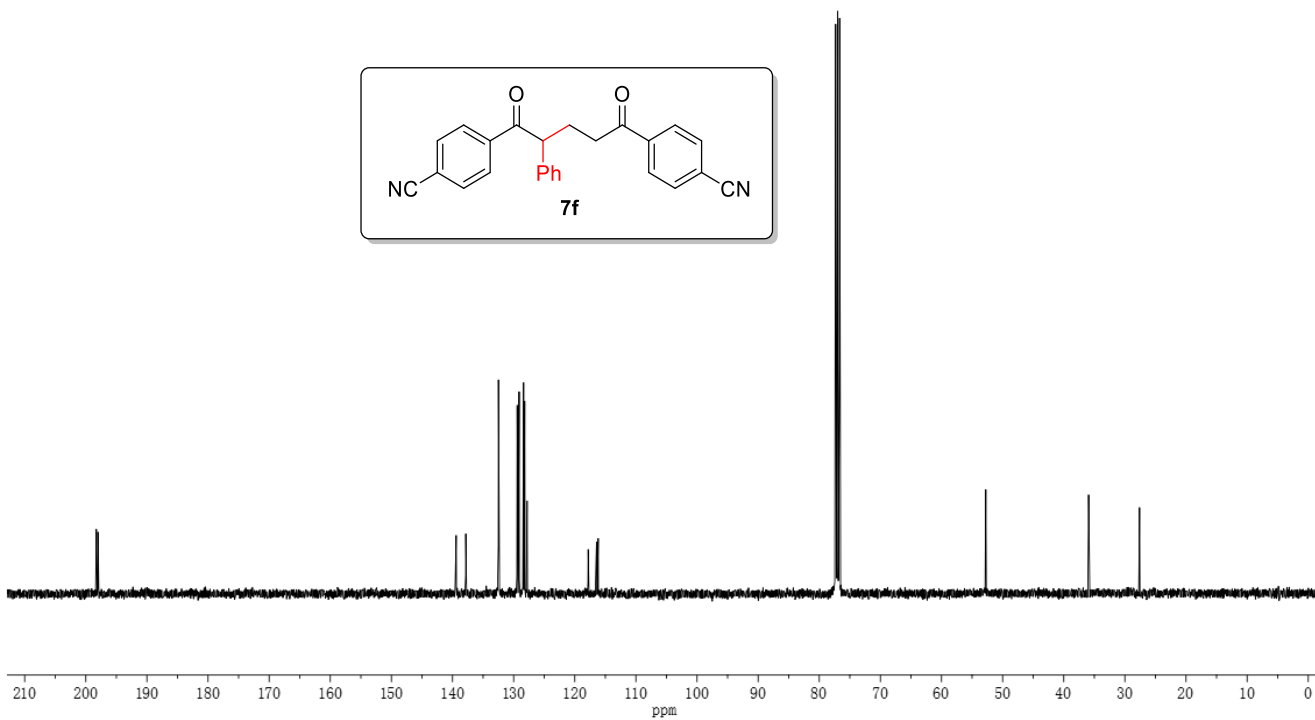

7.97  
7.96  
7.95  
7.94  
7.93  
7.92  
7.91  
7.90  
7.89  
7.88  
7.87  
7.86  
7.85  
7.84  
7.83  
7.82  
7.81  
7.80

4.67  
4.64  
4.63

2.45  
2.43  
2.42  
2.41  
2.39  
2.38  
2.37  
2.36  
2.35  
2.34  
2.33  
2.32  
2.31  
2.30

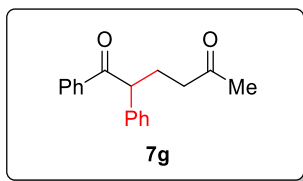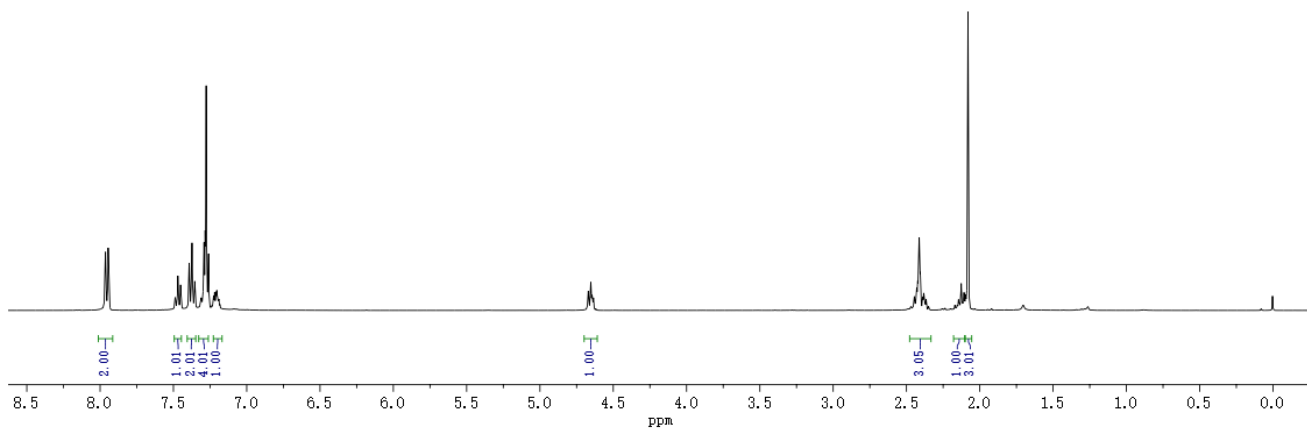

—218.38

—199.47

138.96  
136.57  
135.98  
135.88  
128.88  
128.83  
128.48  
128.24  
127.19

77.32  
77.00  
76.68

—52.18

—41.91

—29.92

—27.80

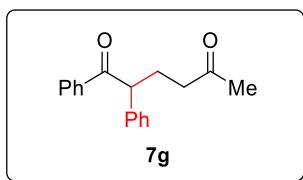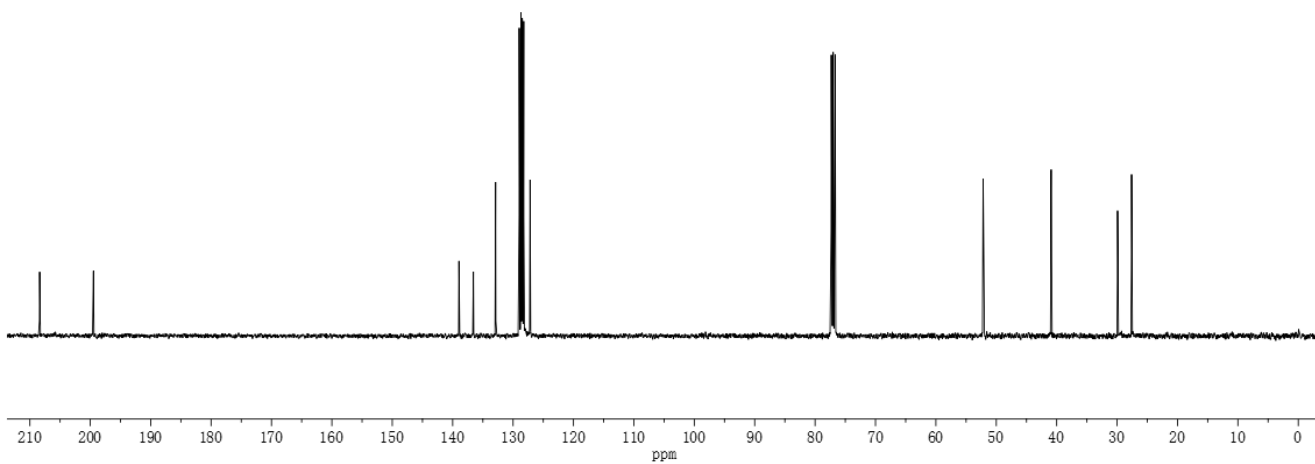

7.96  
7.96  
7.96  
7.94  
7.94  
7.47  
7.47  
7.47  
7.45  
7.45  
7.39  
7.39  
7.36  
7.36  
7.35  
7.35  
7.27  
7.27  
7.22  
7.22  
7.21  
7.21  
7.20  
7.19  
7.18

4.68  
4.67  
4.66

2.44  
2.43  
2.43  
2.41  
2.41  
2.39  
2.39  
2.38  
2.37  
2.37  
2.34  
2.34  
2.19  
2.19  
2.15  
2.15  
2.13  
2.13  
2.11  
2.11  
1.04  
1.04  
1.03

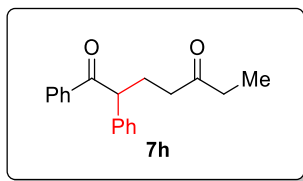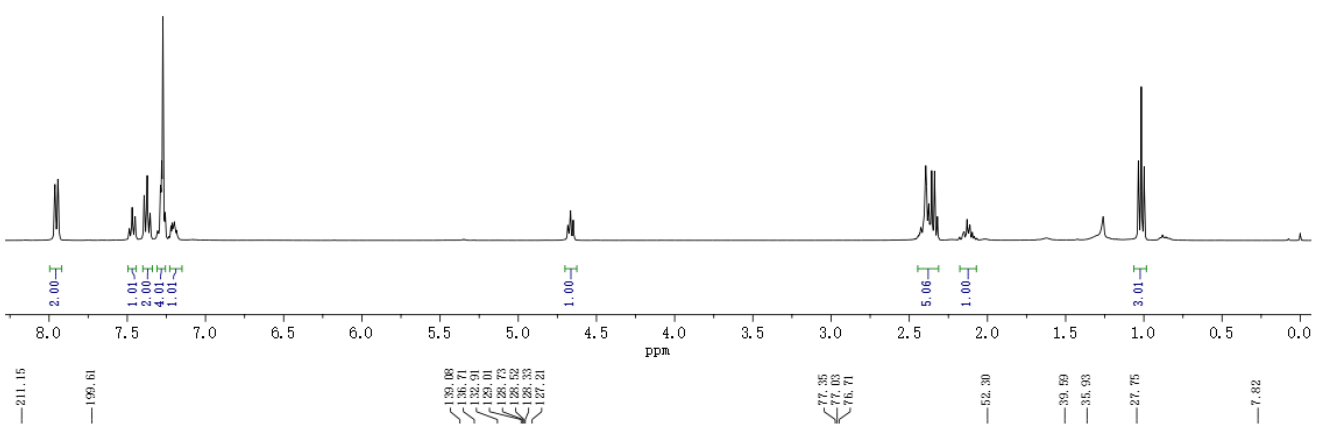

211.15

199.61

139.08  
136.71  
132.91  
129.71  
128.52  
128.33  
127.21

77.35  
77.01  
76.71

52.30

39.59

35.93

27.75

7.82

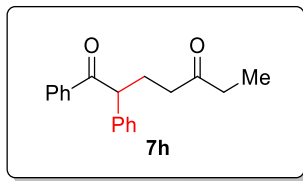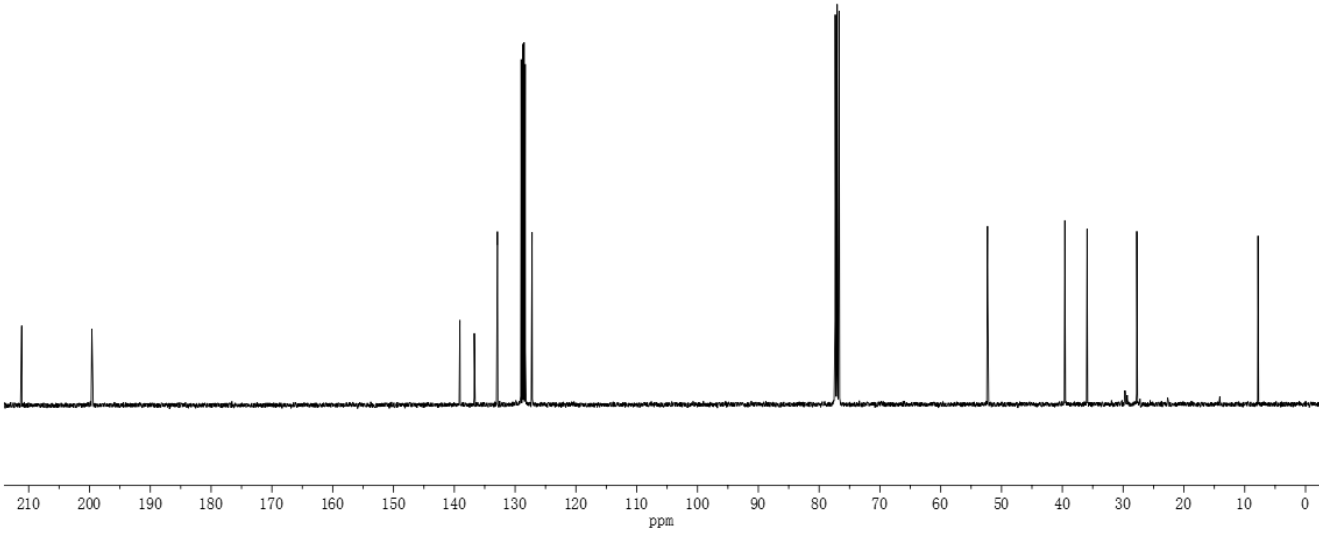

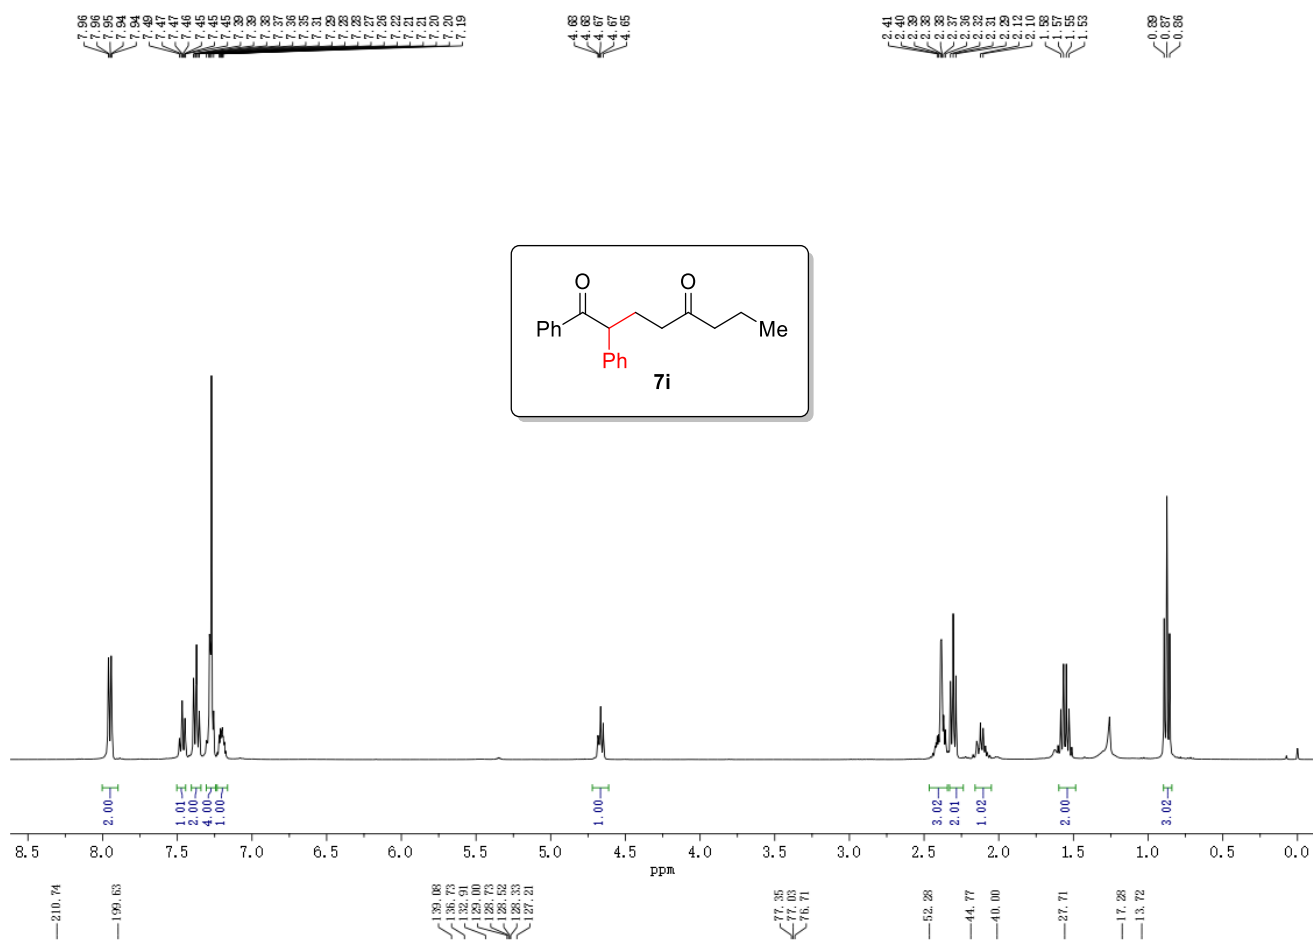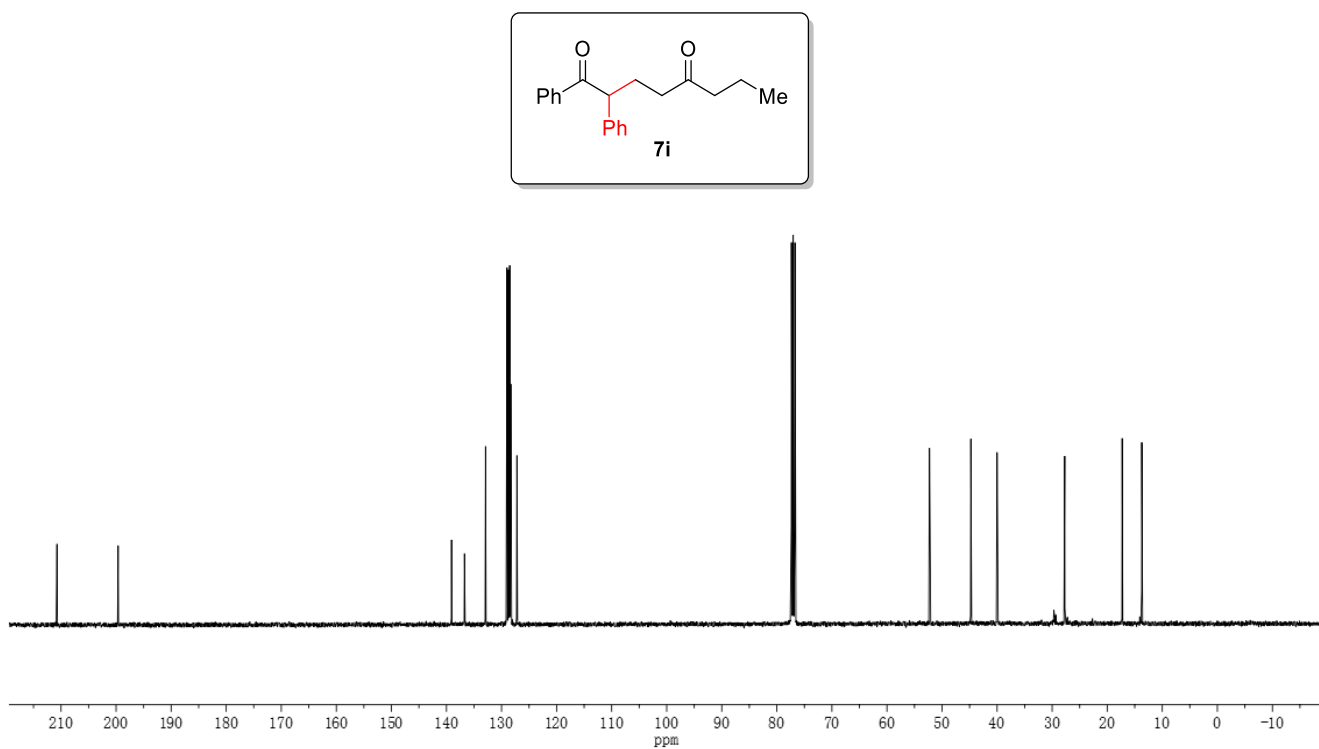



7.88  
7.87  
7.81  
7.80  
7.37  
7.36  
7.35  
7.34  
7.33  
7.32  
7.31  
7.30  
7.29  
7.17  
7.16  
7.14  
7.13  
7.12  
7.11  
7.02  
7.01

4.71  
4.69  
4.68

2.46  
2.45  
2.44  
2.43  
2.42  
2.41  
2.40  
2.39  
2.38  
2.37  
2.36  
2.35  
2.34  
2.33  
2.32

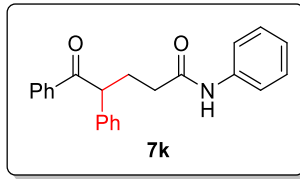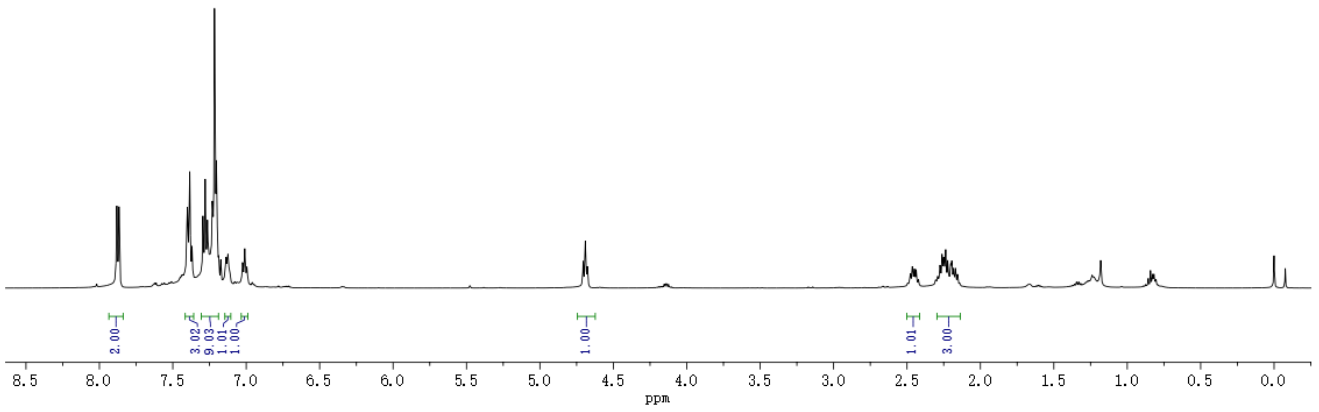

198.71

163.69

137.85  
136.80  
135.47  
132.02  
129.95  
127.77  
127.53  
127.32  
126.25  
125.24  
118.84

76.27  
76.01  
75.76

51.34

33.87

28.31

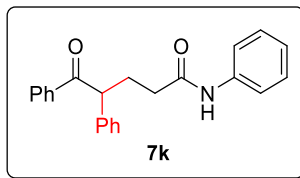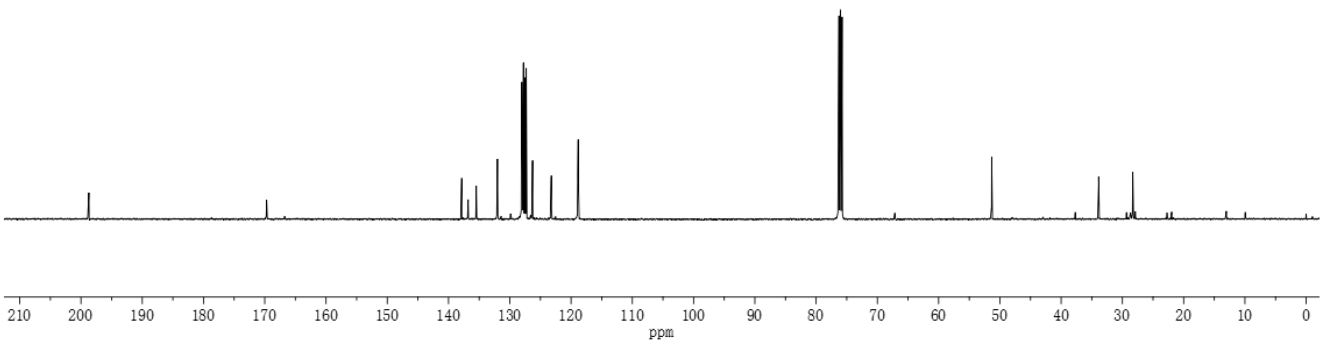





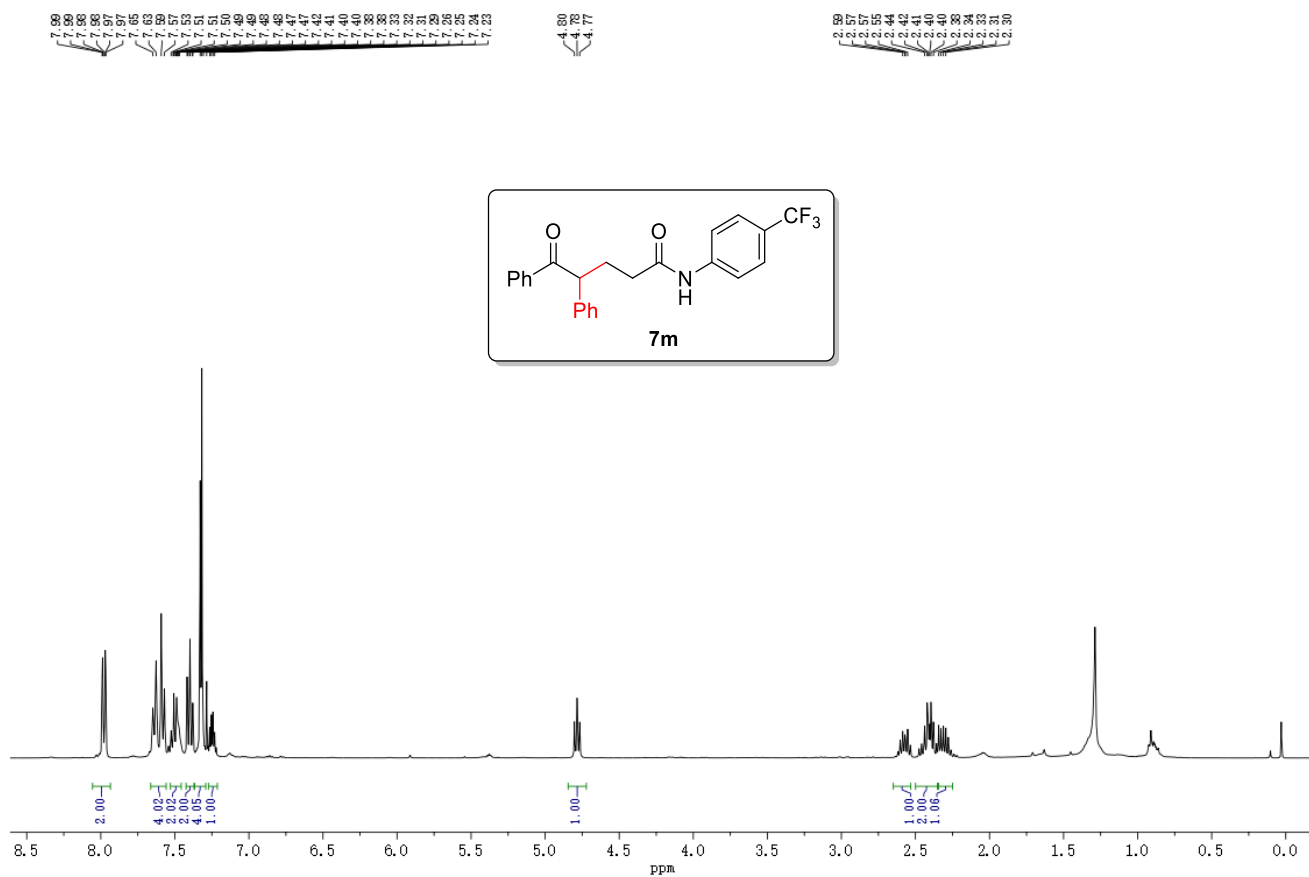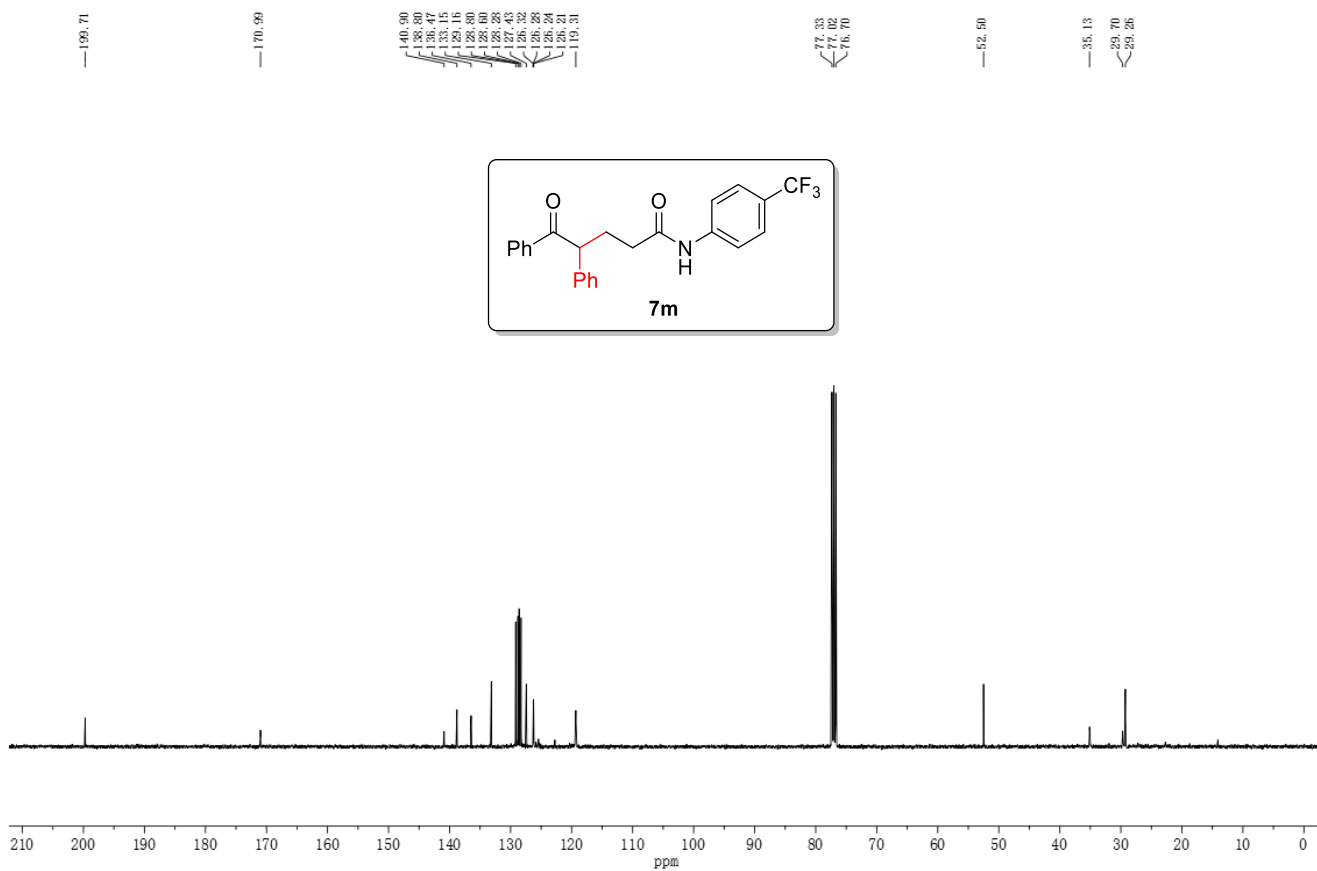

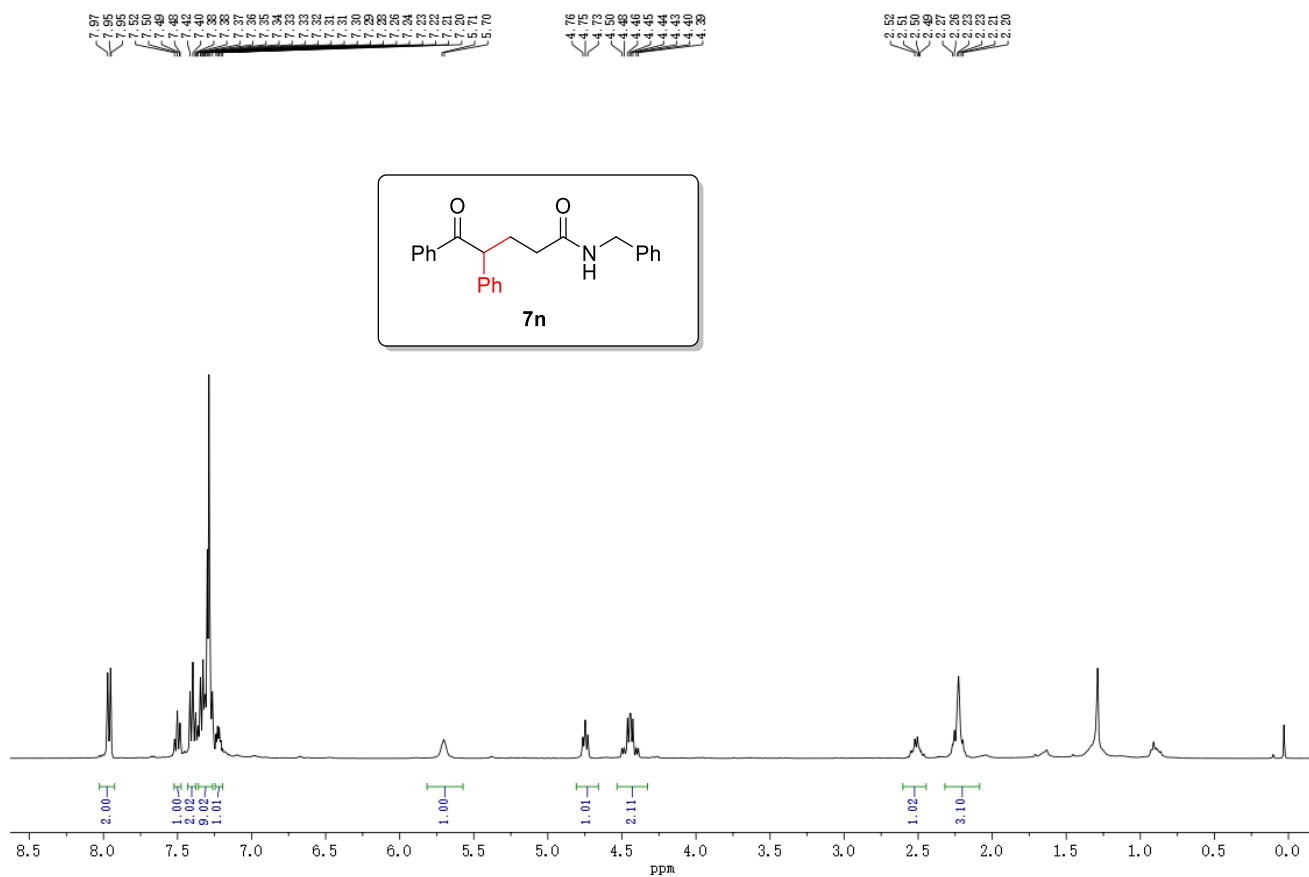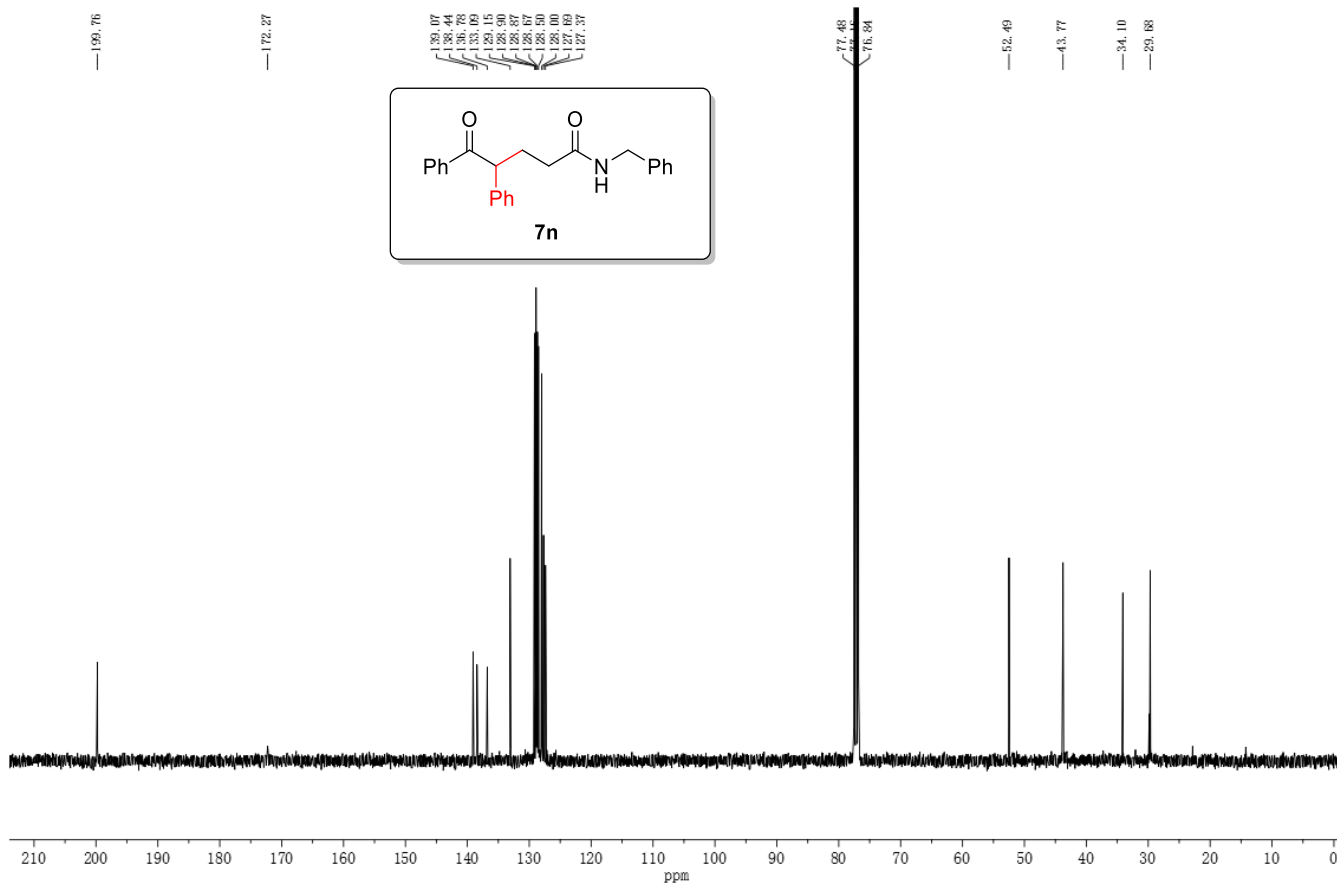

Supplement: d2cc05029c1.pdf [file d2cc05029c1.pdf]
